# Supplementary material for: OsteoporosAtlas: a human osteoporosis-related gene database
Source: PeerJ. 2019 Apr 26;7:e6778. doi: 10.7717/peerj.6778 (PMC6487800; doi:10.7717/peerj.6778)
Supplement: Table S1 — Column 1: osteoporosis-related genes’ entrez gene symbol and microRNAs’ name. Column 2: PubMed ID of potential supporting literature. Column 3: Potential supporting sentence text. [file peerj-07-6778-s001.xlsx]

## Sheet: Summary
TableS1.xlsx
Gene sheet:
1,494 potential osteoporosis-related genes and their supporting literature sentences for manual curation in OsteoporosAtlas 1.0.
Column 1: osteoporosis-related genes’ entrez gene symbol.
Column 2: PubMed ID of potential supporting literature.
Column 3: Potential supporting sentence text.
MicroRNA sheet:
134 potential osteoporosis-related microRNAs and their supporting literature sentences for manual curation in OsteoporosAtlas 1.0.
Column 1: osteoporosis-related microRNAs’ name.
Column 2: PubMed ID of potential supporting literature.
Column 3: Potential supporting sentence text.

## Sheet: Gene
Gene	Pubmed ID	Sentence
AACS	20400887	RESULTS: Patients with osteoporosis had significantly higher PS and AACS than control [mean (range)-PS: 11.85 (0.00-27.50) versus 4.90 (0.00-10.90), P = 0.02 and AACS: 4.0 (0.0-14.0) versus 1.0 (0.0-7.0), P = 0.01].
AACS	20400887	After 1-year treatment, PS and AACS in the osteoporosis group were not statistically changed, whereas both parameters in the control group were significantly increased (P = 0.01 and P = 0.03, respectively).
ACTN4	23896482	This article provides evidence in support of differential allele frequency distributions that underlie the higher rates of nondiabetic kidney disease in the focal segmental glomerulosclerosis spectrum of disease and lower rates of coronary artery calcified atherosclerotic plaque and osteoporosis in populations of African ancestry.
DBNL	15045468	After exclusions by preset criteria (high-energy fractures, ongoing osteoporosis treatment, or unwillingness to participate), 303 women were included, 171 (56%) of whom had a forearm, 37 (12%) proximal humerus, 40 (13%) hip, and 55 (18%) vertebral fracture, respectively, and all were investigated and treated according to the current local consensus program for osteoporosis.
MMP2	17563705	Loss-of-function mutation within the gene encoding matrix metalloproteinase 2 (MMP2) causes the autosomal recessive disorder nodulosis-arthropathy-osteolysis syndrome characterized by carpal-tarsal destruction, subcutaneous nodules, and generalized osteoporosis.
MMP2	18067789	The concentrations of serum OPG and MMP-2 increase possibly as a concomitant event in the high bone turnover state, such as postmenopausal osteoporosis.
MMP2	22618267	INTRODUCTION: The purpose of this study was to reveal the mechanism of inflammation-accompanied osteoporosis by examining the effect of CD4+CD25+ T cells on osteoclast formation, as well as the production of matrix metalloproteinases (MMP)-2, 3, 7, and 9 from osteoclasts.
MMP2	16365830	Moreover, serum MMP-2 concentrations were significantly higher in postmenopausal women with osteoporosis than in age-matched normal controls.
MMP2	18067789	RESULTS: Serum OPG and MMP-2 concentrations were significantly higher in postmenopausal women with osteoporosis ((127.6 +/- 6.3) ng/L; (1388 +/- 121) microg/L)) than those in age-matched normal controls ((72.3 +/- 2.4) ng/L; (1126 +/- 141) microg/L, P < 0.01).
CD44	19580891	Effects of a synonymous variant in exon 9 of the CD44 gene on pre-mRNA splicing in a family with osteoporosis.
CD44	19580891	These observations suggest that the linked synonymous variant found in exon 9 of the CD44 gene might be increasing susceptibility to osteoporosis in this family by affecting the splicing mechanism.
CD44	11874234	The uptake of lipoprotein-borne phylloquinone (vitamin K1) by osteoblasts and osteoblast-like cells: role of heparan sulfate proteoglycans and apolipoprotein E. Vitamin K is essential for the gamma-carboxylation of Gla-containing bone proteins such as osteocalcin and a suboptimal vitamin K status has been linked to osteoporosis but nothing is known of how the lipoprotein-borne vitamin accesses th…
ABCA3	25607347	We explored the potential efficacy of bisphosphonates to prevent ectopic calcification caused by ABCC6 mutations by feeding Abcc6(-/-) mice with diet containing etidronate disodium (ETD) or alendronate sodium trihydrate (AST) in quantities corresponding to 1x, 5x, or 12x of the doses used to treat osteoporosis in humans.
MLC1	20151821	A stratified approach to predict the risk from the adverse effects of L-T4 was devised, taking into account the age of the patient, as well as the presence of preexisting cardiovascular and skeletal risk factors that might predispose to the development of long-term adverse cardiovascular or skeletal outcomes, particularly increased heart rate and left ventricular mass, atrial fibrillation, and os…
INSL3	23856820	Other than being responsible for steroidogenesis and production of testosterone, the function of these cells is fundamental to bone health in at least two other ways: Leydig cells produce insulin-like 3 (INSL3), which has a role in osteoblast function, and they contribute to 25-hydroxylation of vitamin D. Impairment of testicular function leads to low levels of testosterone, INSL3 and 25-hydroxyv…
INSL3	24857857	Young men with mutated RXFP2 are at high risk for osteoporosis, as RXFP2 influences osteoblast metabolism by binding to INSULIN-LIKE PEPTIDE 3 (INSL3).
INSL3	22216350	BACKGROUND: Young men with mutations in the gene for the INSL3 receptor (Relaxin family peptide 2, RXFP2) are at risk of reduced bone mass and osteoporosis.
INSL3	20348548	Possible new determinants for osteoporosis in KS might be related to the AR function and insulin-like factor 3 (INSL3) levels.
INSL3	19416191	This study identified for the first time a role for INSL3 in adults, demonstrating a modulating effect on bone metabolism and linking RXFP2 gene mutations with human osteoporosis.
MAP4	25785089	MAPK3, MAP3K10, MAP3K9, COX10, COX15, ATIC, UMPS and HPRT1 might participate in the pathogenesis of osteoporosis.
OR2T33	16598372	FT levels below the median were independent predictors of prevalent osteoporosis-related fractures (OR, 1.56; 95% CI, 1.14-2.14; p < 0.01) and X-ray-verified vertebral fractures (OR, 2.00; 95% CI, 1.34-2.86; p < 0.001).
ERCC5	25299392	Here, we present a novel (conditional) Xpg-/- mouse model which -in a C57BL6/FVB F1 hybrid genetic background- displays many progeroid features, including cessation of growth, loss of subcutaneous fat, kyphosis, osteoporosis, retinal photoreceptor loss, liver aging, extensive neurodegeneration, and a short lifespan of 4-5 months.
PTN	9299545	These observations indicate that OSF-1 may direct in vivo appositional bone formation by increasing osteoblast activity rather than decreasing osteoclast activity, suggesting a new way to treat osteoporosis with OSF-1.
PTN	25123647	Pleiotrophin is a secreted growth factor with a plethora of functions in multiple tissues and known to be a marker for cardiovascular risk and osteoporosis.
PTN	21353611	Our gene expression microarray data of primary cultures of osteoblasts revealed that the expression of the pleiotrophin (PTN) gene is decreased in osteoporosis.
PTN	21353611	For the first time we have shown that, in postmenopausal women, the PTN gene promoter polymorphism -1227C>T and CT haplotype could contribute to the genetic background of osteoporosis, but these findings need further functional and clinical confirmation.
PTN	19781675	PTN, CXCL2, COL15A1, IBSP, AOX1, MT1G, GSR and TXNRD1 are candidate genes for further studies in the assessment of the genetic susceptibility to osteoporosis.
PTN	21353611	On the basis of these findings, we studied the PTN gene as a candidate gene for genetic susceptibility to osteoporosis.
MEFV	25276036	[Conclusion] In our study, no statistically significant differences were found between FMF patients and a control group in terms of osteoporosis.
MEFV	19346738	The high OPG levels may reflect a preventive mechanism against bone loss; namely, OPG might protect the FMF patients from excessive osteoporosis.
MEFV	21739129	The increased bone loss in the patients with negative family history for FMF should be further investigated with larger patient groups taking into consideration of the risk factors related to family history for osteoporosis.
MEFV	18553115	We investigated the association between familial Mediterranean fever (FMF) and osteoporosis (OP) in adult patients.
MEFV	1295087	The radiographic features of FMF arthritis are usually limited to transient, often severe osteoporosis.
MEFV	20228604	Here, we present another case with FMF and JIA with osteoporosis, successfully treated with etanercept with a four-year follow-up.
NBAS	26578240	Neuroblastoma Amplified Sequence (NBAS) mutation in recurrent acute liver failure: Confirmatory report in a sibship with very early onset, osteoporosis and developmental delay.
EDN1	19526396	Postmenopausal women with osteoporosis may be associated with high endothelin-1.
TKT	26160710	DOI was found to stimulate estradiol biosynthesis in rat ovarian granulosa cells; induce estradiol and progesterone secretion in 16- to 18-month-old female Sprague Dawley rats by upregulating expressions of follicle-stimulating hormone receptor and ovarian aromatase; counteract the progression of osteoporosis and augment bone mineral density; and improve cognitive functioning by upregulating prot…
ACTN3	25521430	Several genes, including myostatin and α-actinin 3, have been shown in a genome-wide association study (GWAS) to be associated with both sarcopenia and osteoporosis.
PMPCA	9391782	Mean hand SFT was significantly lower in patients with osteoporosis compared to patients with normal BMD (difference in means 0.74 mm, 95% CI 0.33-1.15, P < 0.001), as was that of osteopenic patients compared to patients with normal BMD (difference in means 0.28 mm, 95% CI 0.01-0.55, P < 0.05).
PMPCA	15356028	Osteoporosis, mineral metabolism, and serum soluble tumor necrosis factor receptor p55 in viral cirrhosis.
PMPCA	11472897	In secondary osteoporosis, SHBG was correlated with D-Pyr (r = 0.48, p < 0.05) and bSAP (r = 0.55, p < 0.01).
ABCC6	25151188	Most interestingly, additional non-bleeding phenotypes were observed in all patients including midfacial hypoplasia, premature osteoporosis, cochlear hearing loss, heart valve defects, pulmonary stenosis, or pseudoxanthoma elasticum-like phenotype.
ABCC6	25607347	We explored the potential efficacy of bisphosphonates to prevent ectopic calcification caused by ABCC6 mutations by feeding Abcc6(-/-) mice with diet containing etidronate disodium (ETD) or alendronate sodium trihydrate (AST) in quantities corresponding to 1x, 5x, or 12x of the doses used to treat osteoporosis in humans.
ABCC6	17565568	Numerous complications, including pulmonary hypertension, thrombotic events, pseudoxanthoma elasticum and osteoporosis, have been described and all contribute to complicate the treatment of a disease that represents a significant burden for the patients and their families.
ABCC6	21668399	Complications are still common and include heart disease (heart failure and arrhythmias), chronic liver hepatitis, which can evolve in cirrhosis and, rarely, in hepatocellular carcinoma, endocrine problems (hypogonadism, hypothyroidism, diabetes, hypoparathyroidism), stunted growth, osteoporosis, thrombophilia and pseudoxanthoma elasticum.
HPN	12145026	BACKGROUND: Patients receiving home parenteral nutrition (HPN) because of intestinal failure are at high risk of developing osteoporosis.
HPN	14606511	The aim of this study was to assess prospectively the prevalence of osteoporosis in intestinal failure (IF) patients and the changes in bone mineral density in those on long-term HPN and to analyze the factors that may influence the occurrence and evolution of osteoporosis.
PVRL1	15175843	The risk of osteoporosis was higher in women with lower dietary calcium intake (< or =138 mg/day; prevalence rate ratio [PRR], 1.4; 95% confidence interval [CI], 1.0 to 1.9), lower energy expenditure (< or =1,682 kcal; PRR, 1.7; 95% CI, 1.2 to 2.3), and greater years since menopause (> or =6 years; PRR, 2.6; 95% CI, 1.2 to 5.8).
ARRB2	18163191	OBJECTIVES: To assess: (1) how patient and provider compliance with osteoporosis CPGs varies when pharmacotherapy efficacy is presented as relative risk reduction (RRR) versus absolute risk reduction (ARR) and (2) the impact of increasing out-of-pocket drug expenditures on acceptance of guideline concordant therapy.
SALL1	24760244	The aim of this study was to compare the effects of recombinant human 1-34 parathyroid hormone (teriparatide) and the bisphosphonate ibandronate (IBN), on lumbar spine (LS) BMD and TBS in postmenopausal women with osteoporosis.
SALL1	19747992	Among subjects with osteoporosis (n=11, 40) both BMDa (p=0.0008) and TBS (p=0.0001) were lower in subjects with fractures, and both OR and AUC (p=0.013) for BMDa + TBS were greater than for BMDa alone (OR=4.04 [2.35-6.92] vs. 2.43 [1.49-3.95]; AUC=0.835 [0.755-0.897] vs. 0.718 [0.627-0.797], p=0.013).
SALL1	25988660	TBS may also have a role in the assessment of fracture risk in some causes of secondary osteoporosis (e.g., diabetes, hyperparathyroidism and glucocorticoid-induced osteoporosis).
SALL1	23018784	Changes in TBS were assessed in the subset of 107 patients recruited at the Department of Osteoporosis of the University Hospital of Berne, Switzerland, who were included in the HORIZON trial.
SALL1	23018784	In postmenopausal women with osteoporosis, once-yearly intravenous ZOL therapy significantly increased LS BMD relative to PLB over 3 years and TBS as of 2 years.
SALL1	24760244	UNLABELLED: Treatment effects over 2 years of teriparatide vs. ibandronate in postmenopausal women with osteoporosis were compared using lumbar spine bone mineral density (BMD) and trabecular bone score (TBS).
SALL1	23452869	Multiple linear regression and logistic regression (lowest vs highest tertile) was used to define the sensitivity of TBS to other risk factors associated with osteoporosis.
SALL1	23769698	Seventy-three percent of all fractures occurred in women without osteoporosis (BMD T-score > -2.5); 72% of these women had a TBS score below the median, thereby appropriately classified them as being at increased risk.
SALL1	23018784	The aim of this study was to compare the effects of yearly intravenous zoledronate (ZOL) versus placebo (PLB) on LS BMD and TBS in postmenopausal women with osteoporosis.
SALL1	26486892	Because osteoporosis is considered an age-related disease, we hypothesized that age perceived from photographs is associated with bone mineral density (BMD)/trabecular bone score (TBS) when controlled for chronological age.
SALL1	23681084	CONCLUSION: The age-specific reference curve for TBS generated here could therefore be used to help clinicians to improve osteoporosis patient management and to monitor microarchitectural changes related to treatment or other diseases in routine clinical practice.
SALL1	24443324	Based on these data, lumbar spine TBS holds promise as an emerging technology that could well become a valuable clinical tool in the diagnosis of osteoporosis and in fracture risk assessment.
SALL1	24853880	In some situations, like glucocorticoid-induced osteoporosis and in diabetes mellitus, the TBS appears to out-perform DXA.
SALL1	25988660	Although TBS changes with osteoporosis treatment, the magnitude is less than that of aBMD of the spine, and it is not clear how change in TBS relates to fracture risk reduction.
SALL1	24760244	CONCLUSIONS: In postmenopausal women with osteoporosis, a 2-year treatment with teriparatide led to a significantly larger increase in LS BMD and TBS than IBN, suggesting that teriparatide had more pronounced effects on bone microarchitecture than IBN.
SALL1	25166040	TBS is also associated with fragility fractures in subjects with secondary causes of osteoporosis, and preliminary data suggest that TBS might improve fracture prediction when incorporated in the fracture risk assessment system known as FRAX.
SALL1	25149857	CONCLUSIONS: The normative values of TBS for Japanese women presented here would enhance our understanding of trabecular bone microarchitecture and help improve the management of osteoporosis.
SALL1	25348077	We studied bone quality in thalassemia major using trabecular bone score (TBS), a novel texture measurement extracted from spine dual-energy X-ray absorptiometry (DXA), proposed in postmenopausal and secondary osteoporosis as an indirect index of microarchitecture.
SALL1	25149857	Age-related normative values of trabecular bone score (TBS) for Japanese women: the Japanese Population-based Osteoporosis (JPOS) study.
SALL1	23769698	TBS identifies 66-70% of women with fracture who were not classified with osteoporosis by BMD alone.
SALL1	23452869	In contrast, recent osteoporosis therapy was associated with a significantly lower likelihood for reduced TBS.
SALL1	24760244	Comparative effects of teriparatide and ibandronate on spine bone mineral density (BMD) and microarchitecture (TBS) in postmenopausal women with osteoporosis: a 2-year open-label study.
SALL1	24853880	In recent years, a large number of studies have demonstrated that TBS is significantly associated with direct measurements of bone micro-architecture, predicts current and future fragility fractures in primary osteoporosis, and may be a useful adjunct to BMD for fracture detection and prediction.
SALL1	24443324	The following conclusions are based upon publications reviewed in this article: 1) TBS gives lower values in postmenopausal women and in men with previous fragility fractures than their nonfractured counterparts; 2) TBS is complementary to data available by lumbar spine DXA measurements; 3) TBS results are lower in women who have sustained a fragility fracture but in whom DXA does not indicate os…
SALL1	25988660	Trabecular bone score (TBS) as a new complementary approach for osteoporosis evaluation in clinical practice.
SALL1	23873699	Trabecular bone score (TBS) predicts vertebral fractures in Japanese women over 10 years independently of bone density and prevalent vertebral deformity: the Japanese Population-Based Osteoporosis (JPOS) cohort study.
SALL1	24998455	TBS predicted MOF and HF (but not CVF) in models adjusted for FRAX without BMD and osteoporosis treatment.
SALL1	24853880	Utility of the trabecular bone score (TBS) in secondary osteoporosis.
SALL1	25743176	We conclude that TBS may be a useful tool for the further study of glucocorticoid-induced osteoporosis.
SALL1	25988660	In order for TBS to usefully add to bone mineral density (BMD) and clinical risk factors in osteoporosis risk stratification, it must be independently associated with fracture risk, readily obtainable, and ideally, present a risk which is amenable to osteoporosis treatment.
SALL1	26092650	TBS reflects trabecular microarchitecture in premenopausal women and men with idiopathic osteoporosis and low-traumatic fractures.
NCF4	21159208	Role of endogenous and exogenous female sex hormones in arthritis and osteoporosis development in B10.Q-ncf1*/* mice with collagen-induced chronic arthritis.
IRAK1	17576820	In addition, it was shown that IRAK-M knockout mice develop a strong osteoporosis phenotype, suggesting that down-regulation of this molecule activates osteoclast-mediated bone resorption.
IRAK1	17576820	6-Methylprednisolone down-regulates IRAK-M in human and murine osteoclasts and boosts bone-resorbing activity: a putative mechanism for corticoid-induced osteoporosis.
IRAK1	15809356	We show here that mice that lack IRAK-M develop severe osteoporosis, which is associated with the accelerated differentiation of osteoclasts, an increase in the half-life of osteoclasts, and their activation.
IRAK1	12619925	These results suggest that variation of IRAK1 may be an important determinant of postmenopausal osteoporosis, in part through the mechanism of accelerated postmenopausal bone loss.
IRAK1	17576820	We studied the effect of the osteoporosis-inducing glucocorticoid, 6-methylprednisolone (6-MP), on IRAK-M expression in osteoclasts.
IGF1	9284698	Idiopathic osteoporosis in younger individuals could be related to reduced bone formation rather than increased bone resorption, and disturbances in GH or insulin-like growth factor (IGF)-I production could be involved in its pathogenesis.
IGF1	10583303	OBJECTIVE: Serum insulin-like growth factor-1 (IGF-1) decreases with increasing age and this process is more pronounced in women after the menopause in parallel with the increasing prevalence of osteoporosis.
IGF1	16617031	The aim of this study was to investigate the action of alendronate on the IGF-I-deficient bones of adult patients with LS and osteoporosis, as determined by dual X-ray absorptiometry .
IGF1	17703270	In postmenopausal women, IGF-I was lower in women with osteoporosis than in those with normal BMD (p = 0.056), but no differences were found among OPG, RANKL and OPG/RANKL ratio.
IGF1	21740822	Here, we report a patient with TRPS I (MIM 190350) presenting a novel mutation (1096insA) and abnormal changes of severe osteoporosis as well as low serum IGF-I level.
IGF1	8551653	Recombinant human insulin-like growth factor-1 (rhIGF-1) is currently used experimentally to treat patients with insulin-resistant diabetes mellitus, impaired growth, protein malnutrition, and osteoporosis.
IGF1	15261847	However, the precise relationship between the expression of IGF-I in bone and skeletal homeostasis or pathological conditions such as osteoporosis, remains poorly defined.
IGF1	12030545	However, in some patients with acromegaly, secondary osteoporosis is observed, despite the strong anabolic effect of GH and IGF-1 in bones.
IGF1	26600491	By conditional regression analysis, we found that the IGF-1 rs2288377 and rs972936 gene polymorphisms were not associated with the risk of osteoporosis (P < 0.05).
IGF1	10430822	This report will focus on: (a) IGF physiology, including IGF ligands, binding proteins, and proteases; (b) the relationship between IGF-I and bone mass in respect to risk for osteoporosis; (c) the heritable regulation of the IGF-I phenotype; and (d) the association between serum IGF-I and cancer risk.
IGF1	9051859	Growth factors and bone formation in osteoporosis: roles for IGF-I and TGF-beta.
IGF1	8250990	CONCLUSION: The results suggest that the increased bone density and resistance to osteoporosis in patients with osteoarthritis may be associated with increased skeletal concentrations of IGF-I, IGF-II, and TGF beta and may reflect a generally increased biosynthetic activity of osteoblasts in these patients.
IGF1	9069158	To test the hypothesis that growth factors mediate the stimulatory effect of 1,25(OH)2 vitamin D3 [1,25(OH)2D3] on bone remodeling in osteoporosis, the authors studied the effect of the secosteroid administration in two doses (1 microgram/day and 2 micrograms/day) for 14 days on circulating insulin-like growth factor-I (IGF-I), beta 2 microglobulin, and osteocalcin in 18 osteoporotic women.
IGF1	10986623	IGF-I and osteoporosis.
IGF1	9262505	As the femoral neck region is of primary concern for the clinical manifestations of osteoporosis, the current study was intended to assess the IGF-I contents in femoral neck cortical and trabecular bone from aging individuals.
IGF1	8208742	However, work on the beneficial aspects of IGFs for the skeleton remains preliminary at best with the eventual therapeutic role of IGF-I in osteoporosis yet to be defined.
IGF1	7521246	To test the hypothesis that a dysfunctional growth hormone (GH)-insulin-like growth factor (IGF) axis may play a role in the pathogenesis of osteoporosis, we compared the levels of IGF-I, IGF-II and IGF binding protein 3 (IGFBP-3) in 15 women with spinal osteoporosis (i.e.
IGF1	14758570	However, low skeletal IGF-I concentrations may aggravate osteoporosis in these women.
IGF1	15300364	In contrast to our observations in men with idiopathic osteoporosis, mean serum IGF-I concentrations did not differ between subjects and controls (subjects: 22.5+/-2.2 nmol/l versus controls: 20.8+/-1.6 nmol/l; NS).
IGF1	10853706	Recent reports have indicated that reduced plasma levels of IGF-I are associated with osteoporosis in both males and females.
IGF1	22782005	Bone: modulation of IGF-1 might prevent osteoporosis.
IGF1	2598471	The role of the growth hormone-somatomedin axis in the genesis of steroid osteoporosis has been studied by measuring circulating insulin-like growth factor 1 (IGF-1) levels in asthmatic subjects either receiving or not receiving therapy with oral glucocorticoids.
IGF1	15929631	Plasma insulin-like growth factor (IGF-1) and serum lipids were measured and used as biochemical predictors of osteoporosis and CVD, respectively.
IGF1	9751217	This minireview highlights some of the new investigations into the role IGF-I plays in the pathogenesis of osteoporosis.
IGF1	12800944	Polymorphic microsatellite dinucleotide (cytosine-adenine, CA) repeats of the insulin-like growth factor-I (IGF-I) gene may have implications in the development of certain types of cancer and osteoporosis.
IGF1	17874030	The role of IGF-I and IGFBP-1 status and secondary hyperparathyroidism in relation to osteoporosis in elderly Swedish women.
IGF1	22729283	Likewise, in age-related osteoporosis in humans, we found that bone marrow IGF-1 concentrations were 40% lower in individuals with osteoporosis than in individuals without osteoporosis.
IGF1	18436706	GH and IGF-I secretion are decreased in aging individuals, and abnormalities in the GH/IGF-I axis play a role in the pathogenesis of the osteoporosis of anorexia nervosa and after glucocorticoid exposure.
IGF1	15592793	In the logistic regression model, the COLIA1 Sp1 polymorphism, S-25OHD, s-IGF-I and physical activity variables were independently associated with osteoporosis.
IGF1	22729283	Together, these results provide mechanistic insight into how IGF-1 maintains adult bone mass, while also providing a further rationale for its therapeutic targeting to treat age-related osteoporosis.
IGF1	6384252	The possibility remains, however, that decreasing concentrations of serum IGF-I play a role in the more gradual loss of bone with aging (Type II osteoporosis) in which impared bone formation at the cellular level has been demonstrated.
IGF1	19998242	Effect of glucocorticoid-, parathyroid- and thyroid hormones excess on human iliac crest bone matrix insulin-like growth factor (IGF)-I in patients with osteoporosis.
IGF1	11858767	OBJECTIVE: To determine whether the serum concentration of insulin-like growth factor I (IGF-I) correlates with the occurrence of idiopathic osteoporosis in children, and whether serum levels of IGF-I correlate with selected bone metabolism markers in patients with osteoporosis.
IGF1	24068256	Additional basic science studies dissecting the regulation and the function of matrix IGF-1 in modeling and remodeling will continue to provide further insight for future directions for anabolic therapies for osteoporosis.
IGF1	24861474	Both insulin-like growth factor-1(IGF-1) and oral contraceptive (OC) use have been linked to premenopausal breast and colorectal cancers, osteoporosis and cardiovascular disease.
IGF1	21365462	INTRODUCTION: In men, idiopathic osteoporosis (IOP) is often associated with low serum insulin-like growth factor (IGF-1) and reduced bone formation.
IGF1	23508541	Decreased levels of serum insulin-like growth factor-1 (IGF-1) have been proven to cause osteoporosis.
IGF1	21803634	Reduced levels of serum IGF-1 is related to the presence of osteoporotic fractures in male idiopathic osteoporosis.
IGF1	9731561	Our findings show that viral cirrhosis is a major cause of osteoporosis in men, and that low serum IGF-I levels seem to play a role in the bone mass loss in these patients.
IGF1	12435898	We will review the evidence of GH and IGF-I in the pathophysiology and treatment of osteoporosis.
IGF1	14758570	In addition, the relationship between the skeletal levels of IGF-I and bone mineral density (BMD) or the susceptibility to osteoporotic fractures in women with osteoporosis was examined.
IGF1	26600491	Association of the IGF-1 rs35767 and rs972936 polymorphisms with the risk of osteoporosis in a Chinese postmenopausal female population.
IGF1	9661647	These data suggest that men with osteoporosis and reduced IGF-I levels do not appear to have a deficiency in the GH axis.
IGF1	8550792	Injections with growth hormone (GH) or insulin-like growth factor I (IGF-I) have been proposed for anabolic therapy in osteoporosis.
IGF1	12750879	In light of these data, the aim of our prospective, placebo-controlled, randomized clinical trial, with a 3-year follow up, was to examine the effects of cyclic intravenous pamidronate and fluoride in combination, versus pamidronate alone, on bone mineral density (BMD) at vertebral and femoral levels, biochemical markers of bone turnover, IGF-1 serum levels, and safety and tolerability in 40 post…
IGF1	8077337	Because insulin-like growth factor I (IGF-I) is a potent stimulator of osteoblast proliferation, it has potential in the treatment of osteoporosis.
IGF1	26191288	We conducted a case-control study in a Chinese postmenopausal population, and explore the potential role of the promoter region variation of the IGF-1 gene in bone mineral density and osteoporosis risk.
IGF1	16323827	In summary, based on the current evidence, it is clear that circulating GH and IGF-I are critical for skeletal modeling, bone acquisition and age related bone loss.
IGF1	1609630	In this single study we examined the effects of intermittent (daily) human PTH-(1-34) and continuous infusion of human recombinant IGF-I alone and in combination on bone resorption and formation over a 14 day period in an aged Ovx rat model of postmenopausal osteoporosis (2-year-old rats, Ovx at 1 year).
IGF1	9536300	Protein intake, IGF-1 and osteoporosis.
IGF1	11858767	In children with osteoporosis there was also a significant relationship between IGF-I concentration and elimination of pyridinoline and deoxypyridinoline with urine (R=0.64 and R=0.65, respectively; P<0.05).
IGF1	14758570	However, in premenopausal women with idiopathic osteoporosis, skeletal IGF-I positively correlated with BMD at the lumbar spine (r = + 0.58, p = 0.01).
IGF1	24639846	OBJECTIVE: It has been shown that Insulin-like growth factor-1 (IGF-1) may be related with bone mineral density (BMD) or osteoporosis.
IGF1	21599947	Both IGF-1 and OC use have been linked to premenopausal breast and colorectal cancers, osteoporosis and cardiovascular disease (CVD).
IGF1	11241167	The genes for ERs, GH and IGF-I might be useful candidates with which we can begin to detect men at risk from osteoporosis.
IGF1	9443785	To establish the cellular basis for using IGF-I as a possible therapeutic agent for osteoporosis, we examined the effect of locally infused (50 ng/day for 14 days) on the expression of osteoblast-related genes in femurs of old rats.
IGF1	17874030	INTRODUCTION: Our aim was to investigate among elderly women the relationship to osteoporosis of calcium-regulating hormones and insulin-like growth factor-I (IGF-I) and insulin-like growth factor binding protein-1 (IGFBP-1).
IGF1	15300364	These men with idiopathic osteoporosis have reductions in serum IGF-I as well as indices of reduced bone formation.
IGF1	10599704	Insulin-like growth factor I (IGF-I) is an attractive candidate gene for osteoporosis susceptibility, because IGF-I has marked effects on bone cells and has been implicated in the pathogenesis of osteoporosis.
IGF1	16621944	Serum osteocalcin (bone formation marker) was significantly correlated with PTH, but not with leptin, IGF-I or 25-OH vitamin D. Osteocalcin and PTH were positively correlated when samples from all seasons were pooled and when only hibernation samples were considered, raising the possibility that the anabolic actions of PTH help maintain bone formation to prevent disuse osteoporosis.
IGF1	9851760	These results indicate that higher IGF-I levels are associated with greater BMD in very old women, and suggest that future clinical trials employing GH may have a role in the development of treatments for older women with osteoporosis.
IGF1	8585426	In patients with idiopathic osteoporosis, regression analysis of serum IGF-1 against the various histological parameters measured from the bone biopsy disclosed significant correlation's between serum IGF-1 and osteoblastic surface (r = 0.429, p = 0.032), mineralizing bone surface with a double label (r = 0.480, p = 0.015), and the bone formation rate (r = 0.457, p = 0.021).
IGF1	7944076	PATIENTS: 1 patient with the Werner syndrome, a low serum IGF-1 level, and osteoporosis.
IGF1	7889180	We measured serum concentrations of insulin-like growth factors I and II (IGF-I and IGF-II) by radioimmunoassay in 107 healthy women aged 28-78 years and in 116 women with established osteoporosis.
IGF1	24639846	We observed the relationship between polymorphisms of IGF-1(rs35767, rs2288377 and rs5742612) with osteoporosis and BMD in the postmenopausal female population in our study.
IGF1	17768474	Growth retardation, growth hormone / IGF-I / IGFBP-3 axis dysfunction, gonadal dysfunction and hypothalomo-pituitary-gonadal axis dysfunction may be responsible for the development of osteoporosis in the patients with beta-thalassemia major.
IGF1	18052753	RESULTS: IGF-1 concentration was significantly lower in the women with established osteoporosis compared with controls (101.5 +/- 8.9 versus 140.9 +/- 10.8 mug/liter; p < 0.05) and increased significantly after 1, 3, 6, and 12 mo of GH administration (p < 0.001).
IGF1	16330010	RESULTS: The children with osteoporosis and osteopenia were found to have mean IGF-I concentration statistically significantly lower than the controls (548 and 645 v. 819 ng/ml, respectively; p<0.05).
IGF1	8585426	Serum IGF 1 is low and correlated with osteoblastic surface in idiopathic osteoporosis.
IGF1	22976122	Studies linking insulin-like growth factor-1 (IGF-1) to age-related bone loss in humans have been reported but remain only correlative.
IGF1	11397884	We investigated the effects of raloxifene on the GH-IGF-I axis and insulin-glucose homeostasis in a cross-sectional study in the third year of the Multiple Outcomes of Raloxifene Evaluation trial, a double blind, placebo-controlled, prospective study in postmenopausal women with osteoporosis (T-score of -2.5 or less or at least two moderate vertebral fractures).
IGF1	7502707	Human growth hormone (hGH) and insulin-like growth factor I (IGF-I) both stimulate bone formation and have been proposed as therapeutic agents for osteoporosis.
IGF1	9366806	The prevention or treatment of age-related osteoporosis in the elderly by systemic recombinant growth factor therapy (rhIGF-I or rhTGF beta): a perspective.
IGF1	16156678	Primary osteoporosis in men has been linked to changes in sex steroid secretion, the growth hormone-insulin-like growth factor-1 (GH-IGF-1) axis and the vitamin D-parathyroid hormone (PTH) 25-hydroxyvitamin D [25(OH)D]-PTH system.
IGF1	18458708	Preliminary studies of recombinant IGF-I as a treatment for diabetes, osteoporosis and neuromuscular disease have been performed in humans.
IGF1	11895218	OBJECTIVES: The pathogenic role of the decline in serum concentrations of IGF-I in postmenopausal osteoporosis is not fully elucidated.
IGF1	15705990	BACKGROUND: Some studies have demonstrated that the function of the growth hormone (GH)-insulin-like growth factor (IGF)-1 axis is significantly impaired in patients with oral corticosteroid (CS)-induced osteoporosis.
IGF1	23508541	Our purpose was to investigate the expression of a non-invasive vector, recombinant plasmid enhanced green fluorescent protein-N1 (pEGFP-N1) that transferred IGF-1 gene into ovariectomized (OVX) rats in vivo and evaluate the effect of this therapy on osteoporosis.
IGF1	9731561	Serum IGF-I was lower than in control subjects (P < .001), and significant differences were also found between patients with and without osteoporosis (P < .05).
IGF1	23601428	The AN group with osteoporosis had lower IGF-1 and estradiol levels (both p<0.001), lower serum leptin (p<0.02), and higher cortisolemia (p<0.03) levels compared with AN group without osteoporosis.
IGF1	11310349	Previous studies have suggested that insulin-like growth factor-I (IGF-I) and its binding proteins (IGFBPs) have a pathogenetic role in idiopathic osteoporosis.
IGF1	1640193	These observations indicate that circulating IGF-1 could have an important role in maintaining bone mass, and suggest that impairment of IGF-1 production is involved in the pathogenesis of osteoporosis.
IGF1	12213884	However, in vivo studies using recombinant human (rh) IGF-I and/or rhGH have demonstrated stimulation of both bone formation and resorption, thereby potentially limiting the usefulness of these peptides in the treatment of osteoporosis.
IGF1	9591744	It is suggested that increasing the circulating IGF-I concentration through aggressive nutritional therapy and/or GH/IGF-I therapy with supplementation with vitamin D and/or calcium might improve bone growth and mineralization and prevent the development of osteoporosis and consequent fractures in these patients.
IGF1	8619366	To investigate the potential use of growth hormone (GH) in Activate-Depress-Free-Repeat treatment of postmenopausal osteoporosis, we measured changes in serum levels of biochemical markers of bone turnover, insulin-like growth factor-I (IGF-I), calciotropic hormones, and bone mineral density in 40 postmenopausal women with osteopenia (ages 52-73 years) in response to 7 days of treatment with eith…
IGF1	15688799	No correlation between BMD and the concentration of IGF-I, IGF-II and TGF-b1 in bone matrix was detected in either men or postmenopausal women with osteoporosis.
IGF1	26214445	We conducted a case-control study to assess the relation-ship between rs35767, rs2288377, and rs5742612 insulin-like growth factor-1 (IGF-1) and osteoporosis risk in a Chinese female population.
IGF1	15780973	Insulin-like growth factor I (IGF-I) is an important growth factor of bone and thus IGF-I gene has been considered as an attractive candidate gene for osteoporosis.
IGF1	9744989	The polymorphism of insulin-like growth factor-I (IGF-I) gene was examined in Japanese postmenopausal women to analyze the genetic background for osteoporosis.
IGF1	7889180	In the group of 116 women with established osteoporosis, IGF-I was 30% lower (p < 0.01) as compared to a group of 19 height-, weight- and age-matched nonfractured women (mean age 64 years).
IGF1	10986623	Caution must be undertaken in deciphering the results of a low, normal, or high IGF-I in relation to osteoporosis.
IGF1	10853706	Moreover, there is accumulating clinical evidence that treatment with GH or IGF-I has beneficial effects on bone mass and bone remodeling in men with idiopathic osteoporosis, in the elderly and in hypopituitary patients.
IGF1	23508541	The bone metabolism index including serum alkaline phosphatase, the histomorphometric parameters of lumbar vertebra including trabecular area percentage, trabecular thickness, trabecular number and trabecular separation, and the bone mineral density (BMD) and biomechanical parameters of lumbar vertebra including BMD, maximum condensing force, crushing strength in OVX rats transfected by pEGFP-N1-…
IGF1	8585426	These findings suggest that in young eugonadal individuals with idiopathic osteoporosis, reduced IGF-1 concentrations may have an etiological role in the development of this disease.
IGF1	14758570	Previous studies have shown a link between low serum insulin-like growth factor-I (IGF-I) and decreased bone mass of patients with osteoporosis.
IGF1	8550792	In a cross-over study, 12 men with idiopathic osteoporosis received daily subcutaneous injections of GH (2 IU/m2) or IGF-I (80 micrograms/kg) for 7 days with 12 weeks of wash-out.
IGF1	15049965	OBJECTIVE: Age-related decline in IGF-I and gonadal hormones have been postulated to play an important role in the pathogenesis of age-related bone loss in men.
IGF1	20197302	This article will focus on the molecular mechanisms of impaired GH and IGF1 signaling and action in aging, and their role in the pathogenesis of sarcopenia and osteoporosis.
IGF1	8835078	In addition to vitamin D-related mechanisms, recent evidence has indicated a decline in the skeletal content of anabolic growth factors--such as insulin-like growth factor-I (IGF-I)--in femoral (cortical) bone, suggesting that skeletal growth factor deficiency may contribute to the age-related bone loss in the proximal femur as well.
IGF1	25147565	Clinical studies reporting the use of GH and IGF-1 in osteoporosis and fracture healing are outlined.
IGF1	7521246	No evidence for reduced spontaneous or growth-hormone-stimulated serum levels of insulin-like growth factor (IGF)-I, IGF-II or IGF binding protein 3 in women with spinal osteoporosis.
IGF1	14758570	These data provide no clear evidence for low bone matrix IGF-I as a determinant factor of age-unrelated osteoporosis.
IGF1	18301972	In conclusion, measurement of serum IGF-1 in young women may help in the early identification of those at risk for developing low bone mass and osteoporosis.
IGF1	10853706	In addition, nutritional caloric or proteic deficit may add to the effects of GH, age and other factors in decreasing IGF-I synthesis and therefore further contribute to the development of primary osteoporosis.
IGF1	11971746	Dynamic pattern of IGF-I and chosen biochemical markers of bone metabolism in a rat model of postmenopausal osteoporosis.
IGF1	9284698	In the present study, men with idiopathic osteoporosis were compared with healthy men, with respect to bone histomorphometry and to serum levels of IGF-I, IGF-II, IGF binding protein (IGFBP)-2 and IGFBP-3, and 24-h urinary excretion of GH.
IGF1	9744989	The present study showed that there was no association between the microsatellite polymorphism of IGF-I gene and BMD in Japanese postmenopausal women, but some possibility remains that the microsatellite polymorphism of IGF-I gene is useful to detect a kind of particular osteoporosis.
IGF1	9661647	Many men with idiopathic osteoporosis have reduced circulating insulin-like growth factor-I (IGF-I) levels.
IGF1	8909344	Relationship between baseline insulin-like growth factor-I (IGF-I) and femoral bone density in women aged over 70 years: potential implications for the prevention of age-related bone loss.
IGF1	7889180	In conclusion, the serum level of IGF-I is high in young women, when peak bone mass is attained, and low in postmenopausal women with established osteoporosis.
IGF1	1466160	Low turnover osteoporosis related to decreased IGF-I production.
IGF1	20007694	Age-related osteoporosis is accompanied by an increase in marrow adiposity and a reduction in serum insulin-like growth factor-1 (IGF-1) and the binding proteins that stabilize IGF-1.
IGF1	9537849	Since osteoporosis seems to be the predominant form of osteopenia in patients with cirrhosis, IGF-I should be considered as a possible therapy for this disorder.
IGF1	10821876	DHEA deficiency may contribute to age-related bone loss through anabolic (IGF-I) and anti-osteolytic (IL-6) mechanisms.
IGF1	15256976	Insulin-like growth factor I (IGF-I) gene microsatellite repeat polymorphism was found to be associated with osteoporosis in some studies, and collagen-Ialpha1 (COLIA1) Sp1 s allele was associated with lower bone mineral density in primary biliary cirrhosis.
IGF1	15049965	DESIGN AND SUBJECTS: Serum IGF-I, testosterone and BMD were examined in 61 community-dwelling men over the age of 27, who were randomly selected from the Calgary cohort of 1000 subjects in the Canadian Multicentre Osteoporosis Study.
IGF1	15002536	We show that applications of SMC provide additional information about any changes of the bone structure in comparison to bone mineral density (BMD), and that they can be potentially helpful in the diagnosis of osteoporosis.
IGF1	26600491	The aim of our study was to conduct a case-control study in a Chinese postmenopausal population to evaluate the roles of the IGF-1 rs35767 and rs972936 polymorphisms on bone mineral density (BMD) levels and osteoporosis risk.
IGF1	24639846	CONCLUSION: Our study suggests that polymorphism in IGF-I rs35767 was significantly associated with BMD and osteoporosis in postmenopausal female population, and polymorphism of rs35767 could be a marker for lower BMD and risk of osteoporosis.
IGF1	14713283	Influence of fluor salts, hormone replacement therapy and calcitonin on the concentration of insulin-like growth factor (IGF)-I, IGF-II and transforming growth factor-beta 1 in human iliac crest bone matrix from patients with primary osteoporosis.
IGF1	12865234	In SMC side, the humeral fracture healed without either osteoporosis or external callus.
IGF1	18301972	IGF-1 as an early marker for low bone mass or osteoporosis in premenopausal and postmenopausal women.
IGF1	17668143	Patients with osteoporosis were significantly older and had longer disease and amenorrhea durations; lower weight and BMI; higher alkaline phosphatase, BSAP, and osteocalcin; and lower serum ICTP, IGF-I, and IGFBP3.
IGF1	9366806	Because of the potent mitogenic effect of these agents on osteoblasts, recombinant IGF-I (rhIGF-I) and recombinant TGF beta (rhTGF beta) have potential as drugs to stimulate bone formation in the prevention and treatment of osteoporosis.
IGF1	15883443	BACKGROUND: Insulin-like growth factor I (IGF-I) has been implicated in several chronic diseases, including cancer, heart disease, and osteoporosis.
IGF1	9284699	These results suggest that serum IGF-I levels are reduced in men with idiopathic osteoporosis and that IGF-I correlates with and may contribute to the reduction in lumbar spine bone mass density (BMD).
IGF1	25388971	In summary, IGF-1 could promote proliferation and osteogenic differentiation of DPSCs via mTOR pathways, which might have clinical implications for osteoporosis.
IGF1	14758570	In the present study, IGF-I was assessed in serum and bone matrix extracts from the iliac crest in 19 eugonadal women with idiopathic osteoporosis and in 38 age-matched controls.
IGF1	16153900	Serum IGF-I is often low in men with osteoporosis, which may be attributable to GH hypo-secretion or hepatic GH insensitivity.
IGF1	16323827	GH and IGF-I as therapeutic agents for osteoporosis.
IGF1	15688799	Bone matrix insulin-like growth factor (IGF)-I, IGF-II and transforming growth factor (TGF)-beta1 levels in men and postmenopausal women with osteoporosis: lack of association with circulating growth factors and bone mineral density.
IGF1	9718204	The answer could lead to improved understanding of gender differences in osteoporosis and in response to treatment with IGF-I or growth hormone.
IGF1	10620075	Down-regulation of the serum stimulatory components of the insulin-like growth factor (IGF) system (IGF-I, IGF-II, IGF binding protein [BP]-3, and IGFBP-5) in age-related (type II) femoral neck osteoporosis.
IGF1	9284699	Insights into the etiology of idiopathic osteoporosis in men may be revealed by further studies of the IGF-I axis.
IGF1	18443717	RESULTS: The factors and mechanisms which are common to both osteoporosis and frailty (falls, weight loss, sarcopenia, low physical activity, cognitive decline, depression, hormones such as testosterone, estrogens, insulin-like growth factor-I (IGF-I), growth hormone (GH), vitamin D and pro-inflammatory cytokines) were identified.
IGF1	9366806	Further investigation is required to define the clinical potential of rhIGF-I and rhTGF beta as therapeutic agents in age-related osteoporosis.
IGF1	1370164	Based on previous work, we speculate that production of the 24/25-kDa IGFBP, which in vitro is known to inhibit IGF-I- and IGF-II-mediated osteoblast function, may be stimulated by PTH in patients with the syndrome of age-related osteoporosis.
IGF1	14671165	Together with fracture and densitometry data from the original study, relationships were examined between BMD and serum IGF-I, IGFBP-3, testosterone, estradiol, BSAP, and urine NTx, both at baseline and during treatment with alendronate, to gain possible insights into the pathogenesis of male osteoporosis.
IGF1	26214445	In conclusion, our results sug-gest that the TT genotype of IGF-I rs35767 was associated with an in-creased risk of osteoporosis, suggesting that this polymorphism can be used as a predictive factor for osteoporosis risk.
IGF1	24639846	The polymorphism of Insulin-like growth factor-I (IGF-I) is related to osteoporosis and bone mineral density in postmenopausal population.
IGF1	9661596	Additionally, we reported that men with idiopathic osteoporosis (IOM) have low serum IGF-I levels, which can be related to BMD and bone turnover.
IGF1	18079194	Collectively, our data show that altered osteoblast proliferation in human osteoporosis may result from dysregulation of IGF-I receptor signaling, including constitutive activation of the IRS-2/Erk signaling pathway, which becomes unresponsive to IGF-I, and defective induction of the IRS-1/Akt signaling pathway.
IGF1	7876328	Although calciotropic hormones, growth hormone (GH), and insulin-like growth factor-I (IGF-I) change with age, it is not certain if these changes are responsible for age-related bone loss.
IGF1	16154307	On one hand, reduced IGF-I activity is associated with significant morbidity in adulthood with an increased risk of developing cardiovascular disease, diabetes, osteoporosis and neurodegenerative diseases.
IGF1	7944076	CONCLUSIONS: Treatment with rhIGF-1 increased both bone formation and resorption in a patient with the Werner syndrome, a low baseline serum IGF-1 level, and established osteoporosis.
IGF1	23508541	Gene transfer of IGF-1 offers an attractive technology to treat skeletal metabolic disorders including osteoporosis, but the viral vectors are limited by their high antigenicity and immune response.
IGF1	26191288	Our study suggests that TT genotype and CT+TT genotype of IGF-I rs35767 were associated with risk of osteoporosis and BMD levels.
IGF1	22179745	The comparison of the two groups for biochemical parameters and endocrine function showed a protective role of normal gonadic function and IGF-1 levels against osteoporosis, and a similar influence of hypoparathyroidism.
IGF1	19536417	It contributes to the development of osteoporosis, possibly via lower IGF-I.
IGF1	12235108	Thus, the double gene disruption LID+ALSKO mouse model demonstrates that a threshold concentration of circulating IGF-1 is necessary for normal bone growth and suggests that IGF-1, IGFBP-3, and ALS play a prominent role in the pathophysiology of osteoporosis.
IGF1	9284699	We tested the hypothesis that the putative reduction in bone formation in men with idiopathic osteoporosis may be related to deficiencies in skeletal mechanisms that are mediated by insulin-like growth factor I (IGF-I).
IGF1	24683479	LEARNING POINTS: Severe isolated GHD may be caused by mutations in GH1 gene, mainly a 6.7 kb deletion.Appearance of neutralizing anti-GH antibodies upon recombinant GH treatment is a characteristic feature of IGHDIA.Recombinant human IGF1 treatment has been tested in children with IGHDIA with variable results in height and secondary adverse effects, but any occurrence in adult patients has not be…
IGF1	1640193	In 12 consecutive young to middle-aged male patients (mean age (+/- SD) 46 +/- 8 years, range 30-57 years) with symptomatic idiopathic osteoporosis, the plasma concentrations of IGF-1 were significantly lower than in healthy subjects (0.51 +/- 0.25 vs. 0.73 +/- 0.23 U ml-1; P less than 0.01).
IGF1	10821876	In a multiple variable model to predict DHEAS, age was an important predictor (P < 0.001), but osteoporosis status, IGF-I, and IL-6 were not.
IGF1	9883398	Men with idiopathic osteoporosis have low circulating insulin-like growth factor-1 (IGF-1; somatomedin-1) concentrations, and IGF-1 administration to these men increases bone formation markers more than resorption markers.
IGF1	10599704	The IGF-I gene contains a microsatellite repeat polymorphism approximately 1 kb upstream from the IGF-I gene transcription start site, and previous investigators have found a higher prevalence of the 192/192 genotype of this polymorphism among men with idiopathic osteoporosis compared to controls.
IGF1	1640193	Low plasma levels of insulin-like growth factor 1 (IGF-1) in male patients with idiopathic osteoporosis.
IGF1	10986623	Yet, it is uncertain whether low levels of circulating IGF-I actually cause osteoporosis.
IGF1	23508541	This encouraged a potential approach of IGF-1 gene therapy to the treatment of osteoporosis.
IGF1	14671165	In this study, specimens collected at intervals during the recent trial of alendronate in male osteoporosis, from 197 of the original 241 participants, were assayed for testosterone, estradiol, IGF-I, IGF binding protein 3 (IGFBP-3), bone-specific alkaline phosphatase [BSAP (serum)], and N-telopeptide of type I collagen corrected for creatinine [NTx (urine)].
IGF1	11971746	RESULTS: In a model of experimental osteoporosis induced by ovariectomy in female rats a distinct tendency to decrease the IGF-I concentrations was shown.
IGF1	10993598	The GH/ IGF-I system is dysregulated in patients with post-menopausal osteoporosis.
IGF1	23508541	Role of recombinant plasmid pEGFP-N1-IGF-1 transfection in alleviating osteoporosis in ovariectomized rats.
IGF1	16890505	Dried plum prevents bone loss in a male osteoporosis model via IGF-I and the RANK pathway.
IGF1	20189618	IGF-1 and IGFBP-3 may play a role in hepatic osteoporosis.
IGF1	11895218	The osteoporosis densitometric criteria (t-score < or = -2.5 SD) was the most strongly independent associated variable with prevalent vertebral fractures [odds ratio (OR): 3.3 (1.4-7.6)], followed by IGF-I levels below 75th percentile [OR: 3 (1-8.8)].
IGF1	14640888	A decline of bone IGF-I in the cortical portion of bones is one of the many mechanisms leading to the development of involutional osteoporosis.
IGF1	11063288	When compared with normal postmenopausal women, IGF-1 levels were found to be lower in women with osteoporosis.
IGF1	24911144	Taurine increased GH-dependent IGF1 synthesis in the liver, which subsequently enhanced osteoblast function, and in B12-deficient offspring, oral administration of taurine rescued their growth retardation and osteoporosis phenotypes.
IGF1	12213671	OBJECTIVE: To investigate the effect of low-dose GH treatment on markers of body composition and bone turnover, serum concentrations of IGF-I and IGF-binding proteins (IGFBPs), and BMD at the radius and lumbar spine in eight elderly Japanese women with osteoporosis.
IGF1	10430822	Bone, liver, and circulatory IGF-I have received the most attention by investigators, in part because of the ease of measurement and the interaction with disease states such as osteoporosis.
IGF1	26600491	Overall, our study suggests that IGF-1 rs2288377 and rs972936 gene polymorphisms do not influence the risk osteoporosis.
IGF1	1438653	It has been proposed that many of the catabolic changes seen in normal aging, including osteoporosis and muscle atrophy, are in part caused by the decreased action of the GH-IGF-I axis.
IGF1	9258758	The present findings suggest that IGF-I and IGFBP-3 are important to maintaining bone mass quantitatively as well as qualitatively, and that the determination of serum IGF-I and IGFBP-3 levels could be clinically useful to predict the severity of osteoporosis, particularly the risk of bone fracture associated with osteoporosis.
IGF1	19718659	Current approaches to bone anabolic therapies for osteoporosis include the administration of a growth factor, such as IGF-I, or the neutralization of an antagonist.
IGF1	19198769	Other applications that have either been considered or are undergoing clinical trial are based on the ubiquitous tissue-building properties of IGF-I and include chronic liver disease, cystic fibrosis, wound healing, AIDS muscle wasting, burns, osteoporosis, Crohn's disease, anorexia nervosa, Werner syndrome, X-linked severe combined immunodeficiency, Alzheimer's disease, muscular dystrophy, amyot…
IGF1	14758570	Concentration of insulin-like growth factor (IGF)-I in iliac crest bone matrix in premenopausal women with idiopathic osteoporosis.
IGF1	11964019	We found that early and continuous IGF-I deficiency (the anabolic effector of growth hormone) causes dwarfism, acromicria, organomicria, marked obesity, insulin resistance, retardation of skeletal maturation and osteoporosis, as well as muscular and central nervous tissue underdevelopment, and a series of biochemical changes including hypercholesterolemia.
IGF1	9851760	The objective of this study was to determine the association between insulin-like growth factor I (IGF-I) and bone mineral density (BMD) in 425 women and 257 men aged 72-94 who participated in the Framingham Osteoporosis Study component of the Framingham Heart Study in 1992-1993.
IGF1	12629078	To evaluate whether changes in these proteins may to some extent explain the decrease in bone mass in postmenopausal or senile osteoporosis, we measured bone contents of IGF-I, IGF-II, IGF binding protein (IGFBP)-3, IGFBP-5, and OPG in combined extracts obtained after EDTA and guanidine hydrochloride extraction in 60 postmenopausal women aged 47-74 (mean, 63) yr with a previous distal forearm fra…
IGF1	1453131	Low plasma levels of IGF-I have been observed in young men with osteoporosis.
IGF1	6384252	In women with postmenopausal osteoporosis, serum IGF-I and II did not differ from the concentrations in normal women of similar age and did not correlate with BMD.
IGF1	12626768	But the exact relationship between expression of IGF-I in bone and skeletal homeostasis or pathologic conditions, such as osteoporosis, remains poorly defined.
IGF1	16330010	In children with osteoporosis there was also a significant relationship between IGF-I and pyridinoline and deoxypyridinoline in urine.
IGF1	24639846	But there are few evidences on the role of genetic variation of IGF-1 on the BMD or osteoporosis.
IGF1	18052753	In postmenopausal women with established osteoporosis, GH and insulin like growth factor-1 (IGF-1) concentrations are low, and administration of GH has been shown to increase bone turnover and BMD, but the mechanisms remain unclear.
IGF1	24861474	Understanding the effects of different patterns of use of OC on IGF-1 levels and bone mineral density (BMD) may offer insight into its influence on osteoporosis.
IGF1	20189618	Patients with liver cirrhosis and osteoporosis of the proximal femur and lumbar spine had lower IGF-1 (P<0.001, P=0.04, P=0.04 respectively).
IGF1	11147993	The catabolic situation under high TNF-alpha and low IGF-1 levels may play an important role in the pathogenesis of osteoporosis in AS.
IGF1	23735550	CONCLUSION: IGF-1 can increase bone formation by stimulation of osteoblast number and activity, and reduce bone resorption by restriction of differentiation of osteoclast, suggesting that IGF-1 may improve the therapeutic efficacy for disuse osteoporosis.
IGF1	16939394	CONCLUSIONS: Locally and systemically delivered rhIGF-I both produce significant increases in new bone formed in an aged mouse model in which new bone formation is normally markedly impaired, suggesting that rhIGF-I may improve senile osteoporosis.
IGF1	9487986	This finding supports the hypothesis of an IGF-I-mediated pathogenesis of senile osteoporosis.
IGF1	11063288	IGF-1 seems to play an important role in the development of low bone mass and the present results suggest that IGF-1 is a useful predictor of the presence of osteoporosis.
IGF1	6384252	Thus, there was no evidence that impaired synthesis of IGF-I and II contributes to pathogenesis of the syndrome of Type I (postmenopausal) osteoporosis, which is characterized by accelerated loss of trabecular bone and vertebral compression fractures.
IGF1	18713961	This article will review current information on IGF-I signaling and illustrate recent results demonstrating how impaired IGF-I signaling and action may contribute to the pathogenesis of human diseases, including osteoporosis, neurodegenerative disorders, and reduced fetal growth in utero.
IGF1	22865898	CONCLUSIONS: This study demonstrates that even minor changes in PA are associated with effects on serum levels of sclerostin, IGF-I, and BTM and suggests that sclerostin could be a link between mechanical loading and disuse osteoporosis in humans.
IGF1	11858767	RESULTS: It was found that in children with osteoporosis IGF-I concentration was significantly lower than in the control group (mean values were 583 and 850 ng/ml, respectively; P<0.05).
IGF1	14969347	In conclusion, the products which contain enriched glucosidic isoflavone and nutrient supplements such as shark cartilage and calcium can be used for osteoporosis therapy by enhancing the production of IGF-I and TGF-beta.
IGF1	14713283	Postmenopausal women with osteoporosis on HRT (n=39) had lower skeletal IGF-I but not IGF-II levels as compared with age- and BMI-matched non-users.
IGF1	10752709	The link between serum insulin-like growth factor 1 (IGF-1) and postmenopausal osteoporosis remains controversial.
IGF1	11971746	OBJECTIVE: To assess the relationship between the dynamic pattern of IGF-I levels and chosen biochemical markers of bone metabolism in ovariectomized rats - a model of postmenopausal osteoporosis.
SOS1	15304892	The odds ratios per 1 SD decline in QUS parameters adjusted for age were: wrist fractures BUA = 1.6, SOS = 1.5, stiffness = 1.8, osteoporosis-related fractures BUA = 1.9, speed of sound (SOS) = 1.6, stiffness = 2.2, and other fractures, BUA = 1.0, SOS = 1.1, stiffness = 1.1.
SOS1	15036181	Among ultrasonic characteristics, the speed of sound (SOS) is a useful tool for assessment of osteoporosis because, as recently reported, it represents a combination of density and compressibility of bone tissue.
SOS1	9761387	The detection level of pathological changes in osteoporosis are similar between adSOS and lumbar BMD (DXA) and improved by using the UBPS.
SOS1	26142931	PATIENTS AND METHODS: The Saudi Osteoporosis Society (SOS) formed a panel of experts who performed an extensive published studies search to formulate recommendations regarding prevention, diagnosis, and treatment of osteoporosis in Saudi Arabia.
SOS1	16972020	We investigated the relationships of PvuII and XbaI polymorphisms of the estrogen receptor alpha (ER-alpha) gene, lifestyle factors with speed of sound at the calcaneus (calcaneal SOS) and osteoporosis in a population-based study of 140 healthy postmenopausal women.
SOS1	9439049	However, for further evaluation of the relationship between SOS and the most severe complication of osteoporosis, i.e.
SOS1	22911000	Our findings suggest that birth weight, as a rough proxy indicator for genetic and environmental influences during intrauterine life, is associated with BUA and SOS in preadolescent children and may therefore influence the risk of osteoporosis later in life.
SOS1	14685652	The WHO definition was not suitable for use with SOS measurements, and revised T-score thresholds for the diagnosis of osteoporosis of -2.6, -3.0, -3.0 and -2.2 and for osteopenia of -1.4, -1.6, -2.3, and -1.4, for the radius, tibia, phalanx and metatarsal, respectively, were recommended.
SOS1	10912841	These results show that BMD and Ad-SOS values are significantly lowered in patients with early RA and indicate that periarticular osteoporosis in early RA might possibly be better detected using detailed hand scan analyses.
SOS1	12486464	In all subjects who were 80 years or older, the tibial SOS was not significantly different between women with hip fracture and the control group; thus, the tibial SOS in both groups was low, and they were considered to have progressive osteoporosis.
SOS1	22767992	The aim of the present clinical practice-based observational study was to examine the influence of ALN treatment for 1 year on the speed of sound (SOS) of the calcaneus and bone turnover markers in postmenopausal Japanese women with osteoporosis.
SOS1	15939657	The speed of sound (SOS) has become a useful tool in osteoporosis assessment, since it represents a combination of density and compressibility of bone tissue and should provide better information on bone quality and an estimate the fracture risk.
SOS1	16972020	In conclusion, the present study suggests that PvuII and XbaI polymorphims of the ER-alpha gene, age, years since menopause and educational level are associated with bone density, as assessed by calcaneal SOS, and osteoporosis in postmenopausal Vietnamese women.
SOS1	14500274	This study investigated the variations in age-related speed of sound (SOS) at the tibia and prevalence of osteoporosis in native Chinese women, and establishment of a reference database by quantitative ultrasound.
SOS1	20094705	The purpose of this study was to examine associations between bone speed of sound (SOS) and body composition, osteoporosis-related health behaviors, and parental income in adolescent females.
SOS1	17197223	METHODS: We therefore measured broadband ultrasound attenuation (BUA) and speed of sound (SOS) matched for bone mineral density (BMD) and vertebral deformity in idiopathic male osteoporosis.
SOS1	12120907	Risk factors of osteoporosis were determined using the European Vertebral Osteoporosis Study (EVOS) questionnaire, and the bone status was screened by tSOS.
SOS1	15474394	CONCLUSIONS: Our data suggest that an imaging system improves the utility of BUA measurement, but not SOS, for post-menopausal osteoporosis assessment.
SOS1	24951371	The SOS values of distal radius at present study may be used as normal reference data for Chinese mainland population and will be useful for comparing the results of individual studies and determining diagnostic criteria of osteoporosis by QUS.
SOS1	12897977	Cut-off values estimated for QUS variables to detect women with T-score >-2.5 and those with osteoporosis at the axial skeleton either failed to detect subjects with sufficient certainty (phalangeal SOS) or detected a negligible percentage of patients (radial SOS).
SOS1	12200654	The prevalence rates of osteoporosis in the subjects aged 50 and older diagnosed by QUS (8.7% for SOS, 10.7% for BUA) were similar to that diagnosed by total hip BMD (11.5%) and significantly lower than that by the spine BMD (36.1%) when the WHO criteria were applied.
SOS1	9761387	The validity of adSOS and UBPS was examined in 25 young and healthy women (mean age: 33.4 year), 15 postmenopausal healthy women (mean age: 58.5 years), 17 women with osteopenia, (mean age: 52.4 years), as defined by a t-score between -1 to -2.5 SD as lumbar BMD (DXA), and 20 women with osteoporosis and vertebral fractures (mean age: 61.4 years).
SOS1	11446561	Postmenopausal age-related bone loss expressed as the annual change in T-score ranged from 0.040 to 0.089 for SOS and 0.053 to 0.066 for BMD, whilst menopause-related annual loss ranged from 0.036 to 0.094 for SOS and 0.050 to 0.074 for BMD.
SOS1	11446561	The prevalence of osteoporosis as defined by T = <-2.5 in the age range 60-69 ranged from 7.1% to 20.6% for SOS and 6.4% to 12.1% for BMD.
SOS1	14500274	In conclusion, SOS at tibia can provided useful information about bone status in the normative population of native Chinese women for determination of osteoporosis.
SOS1	9849707	With this value, the sensitivity and the specificity for SoS used in the diagnosis of established osteoporosis were, 81.5% and 79.3%, respectively.
SOS1	17470406	All participants were administered a questionnaire on the most relevant risk factors for osteoporosis and fractures; 3 QUS parameters were also measured: broadband ultrasound attenuation (BUA); speed of sound (SOS); and Stiffness Index (SI).
SOS1	11325674	Sensitivities of BUA, SOS, and SI for diagnosing osteoporosis were 100%, and specificities were 73%, 76%, and 78%, respectively.
SOS1	22767992	CONCLUSION: The present study confirmed that ALN treatment suppressed bone turnover, producing a clinically significant increase in the SOS of the calcaneus in postmenopausal Japanese women with osteoporosis.
SOS1	14685652	The aim of this study was to evaluate the age-dependence of T-scores for speed of sound (SOS) measurements at the radius, tibia, phalanx and metatarsal by use of the Sunlight Omnisense, to evaluate the prevalence of osteoporosis and osteopenia at these sites by use of the WHO criteria, and calculate appropriate equivalent T-score thresholds.
SOS1	11095172	In conclusion, multi-site peripheral SOS measurements reveal age-dependent bone changes with a high degree of measurement precision and indicate a prevalence of osteoporosis similar to that obtained by DXA.
SOS1	16213323	The sensitivity of Ad-SOS for osteoporosis diagnosis in the above regions were 100%, 75%, and 25%, respectively; its specificity was 45%, 43%, and 37%, respectively.
SOS1	2698780	Broadband ultrasonic attenuation (BUA) between 0.1 and 0.6 MHz and speed of sound (SOS) were measured on the os calcis in normal women (n = 40), and women who had mild osteoporosis (n = 36).
SOS1	9744988	Significant difference was found between the areas under the ROC curve for each ultrasound variable at ROIv and ROIf for both groups of patients, subjects with osteoporosis (area under curve = 0.87 for BUA at ROIv versus 0.82 at ROIf, P < 0.05; area under curve = 0.85 for SOS at ROIv versus 0.81 at ROIf, P < 0.
SOS1	15474394	To obtain 90% of sensitivity for the diagnosis of osteoporosis, the thresholds were 50.80 and 71.70 dB/MHz for BUA and 1544.80 and 1551.50 m/s for SOS, using imaging and non-imaging devices, respectively.
SOS1	11508981	These results taken collectively suggest that the ABC may carry important diagnostic information independent of that contained in BUA and SOS and, therefore, may be useful as an adjunct measurement in the diagnosis of osteoporosis.
SOS1	17197223	BMD and BUA did not differ, while SOS was lower in osteoporosis (p<0.001) and control group (p<0.001) between the patients with and without vertebral compression.
SOS1	24147269	AIM: To examine the effects of treatment with risedronate for 1 year on speed of sound (SOS) of the calcaneus and bone turnover markers in postmenopausal women with osteoporosis.
SOS1	11090231	In conclusion, RA, QUS.CALC, SOS.PHAL, and SOS.TIB may be useful to preselect postmenopausal women in whom axial DXA is indicated to confirm/exclude osteoporosis at spine or hip.
SOS1	14685652	The prevalence of osteoporosis in the post-menopausal women aged 50 years and over ranged from 1.4 to 12.7% for SOS and 1.3 to 5.2% for BMD.
SOS1	8883119	Speed of sound (SOS) and broadband ultrasound attenuation (BUA) of ultrasound (US) in bone have been proposed as alternatives to radiation-based methods for the quantitative assessment of osteoporosis.
SOS1	11204441	In conclusion, clinical risk factors for osteoporosis affected calcaneal BUA and SOS Z score measurements to the same extent as axial BMD Z score measurements.
SOS1	24147269	CONCLUSION: The present study confirmed that risedronate suppressed bone turnover and elicited a clinically significant increase in the SOS of the calcaneus in postmenopausal women with osteoporosis.
SOS1	26231577	BACKGROUND: We previously reported that alendronate and risedronate reduce the urinary levels of cross-linked N-terminal telopeptides of type I collagen (NTX) by 44.9% and 34.7%, respectively, at 3 months after the start of treatment, and increase the speed of sound (SOS) of the calcaneus by 0.6% and 0.65%, respectively, at 12 months after the start of treatment in postmenopausal women with osteo…
SOS1	11731047	The age of peak SOS and the rate of change thereafter varied with anatomical site, implying that the prevalence of osteopenia and osteoporosis was site-dependent if only one T score cut-off point was used.
TGFB2	14651333	Circulating levels of osteoclast activating cytokines, interleukin-11 and transforming growth factor-beta2, as valuable biomarkers for the assessment of bone turnover in postmenopausal osteoporosis.
TGFB2	14651333	The objective of this study was to evaluate the role of osteoclast activating cytokines, interleukin-11 (IL-11) and transforming growth factor-beta2 (TGF-beta2) in the assessment of bone turnover in postmenopausal osteoporosis (PO).
TGFB2	14651333	The results demonstrated a significant increase of both IL-11 and TGF-beta2 in postmenopausal osteoporosis.
TGFB2	14651333	In conclusion, both serum IL-11 and TGF-beta2 determinations may be considered as biomarkers for the assessment of bone turnover and for monitoring antiresorptive therapy in postmenopausal osteoporosis.
TGFB2	9658179	We have previously shown that osteoblastic overexpression of TGF-beta2 in transgenic mice deregulates bone remodeling and leads to an age-dependent loss of bone mass that resembles high-turnover osteoporosis in humans.
TGFB2	8567723	Increased expression of TGF-beta 2 in osteoblasts results in an osteoporosis-like phenotype.
HSD17B2	24974351	This new compound 21 could be used for an in vivo proof of principle to demonstrate the true therapeutic efficacy of 17β-HSD2 inhibitors in osteoporosis.
HSD17B2	21945251	As 17β-hydroxysteroid dehydrogenase type 2 (17β-HSD2) catalyses the conversion between active 17β-hydroxysteroid estradiol (E2) and testosterone (T) into their less active 17-ketosteroid and has been found in bones, 17β-HSD2 inhibitor may provide a new approach in the onset of osteoporosis.
HSD17B2	26230928	Design and synthesis of a new class of inhibitors for the treatment of osteoporosis and its comparative h17β-HSD2 and m17β-HSD2 SAR study are described.
HSD17B2	21211981	17β-HSD2 inhibitors for the treatment of osteoporosis: Identification of a promising scaffold.
HSD17B2	21945251	Discovery of a new class of bicyclic substituted hydroxyphenylmethanones as 17β-hydroxysteroid dehydrogenase type 2 (17β-HSD2) inhibitors for the treatment of osteoporosis.
HSD17B2	24974351	As 17β-HSD2 is present in bones and as estradiol and testosterone are able to induce bone formation and repress bone resorption, inhibition of this enzyme could be a new promising approach for the treatment of osteoporosis.
HSD17B2	25259513	17β-HSD2 is a promising new target for the treatment of osteoporosis.
HSD17B2	23145773	Inhibition of 17β-HSD2 is an attractive mechanism for the treatment of osteoporosis.
HSD17B2	21972996	As 17β-hydroxysteroid dehydrogenase type 2 (17β-HSD2) oxidizes E2 to its inactive form estrone (E1) and has been found in osteoblastic cells, it is an attractive target for the treatment of osteoporosis.
HSD17B2	22532378	A series of disubstituted-1H-1,2,4-triazole derivatives was synthesized with the aim of developing new non-steroidal inhibitors of 17β-hydroxysteroid dehydrogenase type 2 (17βHSD2) - a novel and attractive target for the treatment of osteoporosis.
HSD17B2	21211981	Since 17β-HSD2 is present in osteoblasts, inhibition of this enzyme may provide a new and promising approach to prevent the onset of osteoporosis, keeping a certain level in estrogens and androgens in bone cells of ageing people.
PLAU	15927351	Tumor necrosis factor alpha, CYP 17, urokinase, and interleukin 10 gene polymorphisms in postmenopausal women: correlation to bone mineral density and susceptibility to osteoporosis.
PLAU	15927351	We investigated the correlations between bone mineral density (BMD) and four gene polymorphisms (-308G>A tumor necrosis factor alpha (TNF-alpha), -34T>C CYP 17, *141T>C urokinase, and -627C>A interleukin 10 (IL-10) promoter), and their relationship to osteoporosis in postmenopausal women.
GALNT3	24045674	The aim of present study is to investigate the association of GALNT3 polymorphisms with osteoporosis phenotypes in Chinese postmenopausal women.
GALNT3	21911527	These trends remain significant even when multivariate analysis adjusts for age, gender, prosthesis, operating consultant, pre-operative HHS and SF-36, and comorbidities including diabetes mellitus, cardiac disease and osteoporosis.
GALNT3	24045674	CONCLUSIONS: GALNT3 may play a role in genetic susceptibility to osteoporosis among Chinese postmenopausal women.
IFT122	17541498	No significant differences of sRANKL, OPG, IL-6, and spg130 were found between patients with osteoporosis (47.9% of patients), osteopenia (36.6%), and normal BMD (15.5%).
TRAF3IP2	22511335	Estrogen deprivation, therefore, promotes RANKL expression and bone resorption in association with upregulation of the IL-17 effector, Act1, supporting the concept that post-menopausal osteoporosis is a disorder of innate immunity.
TRAF3IP2	22511335	IL-17 mediates estrogen-deficient osteoporosis in an Act1-dependent manner.
RAC1	18089636	Collectively, these data demonstrate that Rac1 critically contributes to increased osteoclast function induced by haploinsufficiency of Nf1 and implicate Rac1 as a rational therapeutic target for osteoporosis.
RAC1	18269307	CONCLUSIONS: In this study, we show that diosmetin induced osteoblastic differentiation through the PKCdelta-Rac1-MEK3/6-p38 and PKCdelta-Rac1-MEK1/2- ERK1/2-Runx2 pathways and that it is a promising agent for treating osteoporosis.
RAC1	20683708	SUMMARY: The roles of Rac1 and Rac2 in regulating osteoclast-mediated bone quality in postmenopausal osteoporosis were evaluated using an ovariectomized murine model.
RAC1	20683708	CONCLUSION: Our results demonstrate that the deletion of Rac1 increases vertebral bone quality compared to WT bones in a postmenopausal osteoporosis model.
RAC1	20683708	INTRODUCTION: To determine the roles of the Rho family small GTPases Rac1 and Rac2 in regulating osteoclast-mediated bone quality in a model of postmenopausal osteoporosis.
OR2B6	22532000	Participants whose cohabitant smokers consumed ≥20 cigarettes/day showed increased aORs for lumbar (aOR, 5.40; 95 % CI, 1.04-28.04) and femoral neck (aOR, 4.35; 95 % CI, 1.07-17.68) osteoporosis compared with participants not exposed to SHS.
OR2B6	21144090	In a sample of 619 women, history of fracture (odds ratio [OR], 12.49), weight less than 127 pounds (OR, 3.50), and use of anticoagulants (OR, 5.40) increased the chance of developing osteoporosis.
CYCS	9496661	depigmentation of hair due to depressed tyrosinase activity, osteoporosis by depressed lysyl oxidase activity, sudden heart failure due to decreased activity of lysyl oxidase, cytochrome c oxidase and Cu/Zn-superoxide dismutase; in addition, mucosal lesions and ulcerations due to loss of activity of diamine oxidase as well as of lysyl oxidase and cytochrome c oxidase.
AGFG1	14557854	A total of 157 postmenopausal women aged over 60 years with osteoporosis were divided into five groups according to their postural deformities: round back (RB, n=41), hollow round back (HRB, n=33), whole kyphosis (WK, n=40), lower acute kyphosis (LAK, n=18), and normal posture (NP, n=25).
AGFG1	22480322	Recently, RabGGTase inhibitors have been proposed to be potential therapeutics for treatment of cancer and osteoporosis.
RAP1A	20548944	A two-stage meta-analysis of GWAS from 7,633 Caucasian women and 3,657 men, revealed three novel loci associated with osteoporosis-related traits, including chromosome 1p13.2 (RAP1A, p = 3.6x10(-8)), 2q11.2 (TBC1D8), and 18q11.2 (OSBPL1A), and confirmed a previously reported region near TNFRSF11B/OPG gene.
MMP7	22618267	CONCLUSIONS: The decreased CD4+CD25+ T cells may cause an overproduction of MMP-7 and 9 from osteoclasts, which highlight the role of CD4+CD25+ T cells on rheumatic osteoporosis.
MMP7	26254457	The results indicate that breast carcinoma cells induced different responses in PBMC derived from rats affected by estrogen deficiency osteoporosis (OP) in comparison with healthy ones, with a significant increase in proliferation rate, OC differentiation, synthesis of TNF-α, MMP-7 and MMP-9.
EP300	19825157	CONCLUSION: Our findings of a statistically lower bone density and prolonged P300 in patients with high parathyroid hormone levels may suggest that increased parathyroid hormone levels coupled with prolonged P300 latency may become putative biological markers of both dementia and osteoporosis and warrant intensive investigation.
TRIO	25074351	Comparison of the effects of three oral bisphosphonate therapies on the peripheral skeleton in postmenopausal osteoporosis: the TRIO study.
MITF	17464203	In order to investigate the genetic effects of MITF variations on osteoporosis, we directly sequenced the MITF gene in 24 Koreans, and identified fifteen sequence variants.
RENBP	22299423	The relationships between retinol, retinol transport protein, retinol binding protein 4 (RBP4) and transthyretin (TTR) and BMD and osteoporosis are unclear.
RENBP	22299423	To examine the association between retinol and RBP4 and TTR and osteoporosis, 73 osteoporotic and 71 normal Thai postmenopausal women were studied.
SETD2	24023068	Osteoclast-specific HIF1α inactivation antagonized bone loss in Ovx mice and osteoclast-specific estrogen receptor alpha deficient mice, both models of estrogen-deficient osteoporosis.
SETD2	24242187	The hypoxia-inducible factor-1α (HIF-1α)/vascular endothelial growth factor (VEGF) pathway is involved in skeletal development, bone repair, and postmenopausal osteoporosis.
SETD2	25375896	Thus, suppression of HIF1α protein activity in osteoclasts in vitro, which is more efficiently achieved by ED71 rather than by 1,25(OH)2D3, could be a reliable read-out in either developing or screening reagents targeting osteoporosis.
SETD2	25929338	Additionally, HIF-1α transcription was inhibited by zoledronic acid, a conventional drug for the treatment of postmenopausal osteoporosis, and was accompanied by a marked inhibition of the RAS/MAPK/ERK1/2 pathway.
SETD2	24023068	HIF1α is required for osteoclast activation by estrogen deficiency in postmenopausal osteoporosis.
SETD2	26255954	Mechanism Underlying Post-menopausal Osteoporosis: HIF1α is Required for Osteoclast Activation by Estrogen Deficiency.
SETD2	24242187	This study examined the effects of estrogen on the HIF-1α/VEGF pathway in osteoblasts and whether PHD inhibitors can protect from bone loss in postmenopausal osteoporosis.
SETD2	25375896	Recently, HIF1α expression in osteoclasts was demonstrated to be required for development of post-menopausal osteoporosis.
SETD2	24023068	Thus, HIF1α represents a promising therapeutic target in osteoporosis.
NOS2	12586786	To verify whether this could explain the estrogen-dependent blockade of osteoporosis, we investigated the effect of ovariectomy in mice in which iNOS activity had been blunted by genetic or pharmacological manipulation.
NOS2	16362227	Evaluation of the relationship between inducible nitric oxide synthase (iNOS) activity and effects of melatonin in experimental osteoporosis in the rat.
NOS2	11762939	Since cytokine-induced nitric oxide (NO) production has been shown to inhibit osteoblast growth and differentiation in vitro, this study was undertaken to investigate the role of the inducible NO synthase (iNOS) pathway in the pathogenesis of inflammation-mediated osteoporosis (IMO) by studying mice with targeted inactivation of the iNOS gene (iNOS knockout [iNOS KO] mice).
NOS2	11762939	Activation of the inducible nitric oxide synthase pathway contributes to inflammation-induced osteoporosis by suppressing bone formation and causing osteoblast apoptosis.
NOS2	16362227	Inducible nitric oxide synthase (iNOS) plays a critical role in the pathogenesis of osteoporosis.
NOS2	10620073	Our data not only suggest that iNOS activation and increased NO production contribute to the pathogenesis of osteoporosis in these situations, but also suggest that NOS inhibitors could be of therapeutic value in the prevention and treatment of such bone loss.
NOS2	12586786	Our findings point to a key role of iNOS in mediating the negative effects of estrogen depletion on bones and provide a novel mechanistic explanation for the effects of menopause in osteoporosis and possibly also in other diseases in which the inflammatory component is elevated.
NOS2	17920533	Activation of the inducible nitric oxide synthase (iNOS) pathway contributes to inflammation-induced osteoporosis by suppressing bone formation and causing osteoblast apoptosis.
TPRG1L	25377907	Increased bone mineral density with monthly intravenous ibandronate contributes to fracture risk reduction in patients with primary osteoporosis: three-year analysis of the MOVER study.
GYS1	16730140	The main reasons for prescribing HRT were climacteric complaints and improvement in life quality for GYs and, climacteric complaints and the prevention of osteoporosis for GPs.
MSC	25796354	CONCLUSIONS: TERT-transfected MSCs can help osteoporosis patients in whom MSC proliferation and osteogenic differentiation ability are weak, with an increase in both bone mass and bone density, becoming an effective material for autologous transplantation of MSCs in further treatment of osteoporosis.
MSC	21744049	In conclusion, htMSCs can be used successfully to enhance bone regeneration in vivo, opening a new field for future treatments of osteoporosis and bone reconstruction.
MSC	24704416	MSCs have been used for the treatment of osteogenesis imperfecta, hypophosphatasia, osteonecrosis of the femoral head, osteoporosis, rheumatoid arthritis and osteoarthritis.
MSC	24463781	Osteoblasts, adipocytes, and mesenchymal stem cells (MSCs) are all components of the bone marrow microenvironment and thus may have an effect on diabetes-related osteoporosis.
MSC	12209882	Factors driving human MSCs (hMSCs) to differentiate down the two lineages play important roles in determining bone density because it has been shown that bone volume loss associated with osteoporosis and aging is accompanied by reduced osteoblastic bone formation and increased marrow adipose tissue.
MSC	23991002	The functional deficiencies of bone marrow-derived mesenchymal stem cells (MSCs) may contribute to the aging process and age-related diseases, such as osteoporosis.
MSC	23827126	Our hypothesis is that n-3 PUFA positively influence obesity and osteoporosis by reducing LGCI, ultimately leading to a beneficial shift in MSC lineage commitment.
MSC	21809421	Thus, Wwp1 targets JunB for ubiquitination and degradation in MSCs after chronic exposure to TNF, and inhibition of Wwp1 in MSCs could be a new mechanism to limit inflammation-mediated osteoporosis by promoting their differentiation into osteoblasts.
MSC	18249091	In this review article, we provide evidence that most age-associated diseases such as osteoporosis are mesenchymal stem cell (MSC) disorders and, based on this evidence, we propose a new concept of "stem cell disorders (SCDs)", including HSC and MSC disorders.
MSC	18236786	The above results indicated that icariin may exert bone-strengthening activity by enhancing the osteogenic differentiation of MSCs, which partially explains the anti-osteoporosis action of Epimedium herb.
MSC	19278793	We herein hypothesize that MSCs may be the primary target cells for caffeine-induced osteoporosis.
MSC	25363305	It was found that compensatory mechanobiological responses that occur during osteoporosis, such as increased trabecular stiffness and axial alignment of trabeculae, would be effective in returning MSC stimulation in trabecular marrow to normal levels.
MSC	22264144	This inverse relationship in theory partially underlies the clinical entity of osteoporosis, in which marrow MSCs have a preference for adipose differentiation that increases with age.
MSC	20738756	These results suggest that melatonin directly inhibits hMSCs adipogenic differentiation and significantly enhances hMSCs osteogenic differentiation by suppressing PPARγ expression and enhancing Runx2 expression; this provides further evidence for melatonin as an anti-osteoporosis drug.
MSC	25640452	Osteoporosis-associated alteration in the signalling status of BMP-2 in human MSCs under adipogenic conditions.
MSC	23927731	In the present study, MSC from osteoporotic donors were analyzed for changes in mRNA expression in response to 10% uniaxial tensile strain to identify potential mechanisms underlying the use of this mechanical loading paradigm for prevention and treatment of osteoporosis.
MSC	26674421	Thus, management of the differentiation capacities of MSCs is important for MSC-based regenerative medicine, such as craniofacial bone regeneration, and in new treatments for metabolic bone diseases, such as osteoporosis.
MSC	24565373	BACKGROUND: It has been suggested that the formation of osteoblasts in bone marrow is closely associated with adipogenesis, and the balance between osteogenesis and adipogenesis differentiation of MSCs (mesenchymal stem cells) is disrupted in osteoporosis.
MSC	23598412	As the post-transcription regulation by microRNAs (miRNAs) has a critical role in MSCs differentiation and bone homeostasis, we performed comprehensive miRNAs profiling and found miR-705 and miR-3077-5p were significantly enhanced in MSCs from osteoporosis bone marrow.
MSC	26008984	We propose that ZNF521 can function as a repressor of osteoblastic differentiation of bmMSCs while promoting adipogenesis, and that elevated ZNF521 expression might play a role in the age-related bone loss.
MSC	12200657	As the volume of bone adipose tissue increases in vivo with age, we hypothesized that decreased bone formation observed during aging and in patients with osteoporosis (OP) is the result of enhanced adipogenesis and decreased osteoblastogenesis from the MSCs.
MSC	24416618	In summary, understanding those factors that govern osteogenic versus adipogenic MSC differentiation has significant implications in diverse areas of human health, from obesity to osteoporosis to regenerative medicine.
MSC	17680723	We also used retrovirus-mediated gene transduction to establish three different human mesenchymal stem cell (hMSC) strains stably expressing wildtype LRP5 (hMSC-LRP5(WT)), LRP5(T244) (hMSC-LRP5(T244), inactivation mutation leading to osteoporosis), or LRP5(T253) (hMSC-LRP5(T253), activation mutation leading to high bone mass).
MSC	23577816	Osteoporosis resulting from microgravity during spaceflight may possibly be due to a decrease in osteogenesis mediated by hMSCs.
MSC	17973271	The aim of the present report was to study the direct effect of leptin on control and osteoporotic MSCs analyzing whether the protective effect of leptin against osteoporosis could be expressed by inhibition of adipocyte differentiation.
MSC	25351366	The ability of mesenchymal stem cells (MSCs) to differentiate into osteogenic lineages requires management for their future use in treating bone destruction and osteoporosis.
MSC	20736793	The aim of this study was to investigate the effect of bone morphogenetic protein-2 (BMP-2), BMP-7, parathyroid hormone (PTH), and platelet-derived growth factor (PDGF) on proliferation and osteogenic differentiation of MSCs derived from patients with osteoporosis.
MSC	25428397	Results of our study suggested that careful titration of MSC was response to L-A and up-regulated FasL pathways mediating differentiation of ERK and GSK-3β-catenin biological systems under disease state in vivo, restore the impaired function, is one of the ways of L-A relieve or treatment osteoporosis.
MSC	22518296	In this paper, we define HO-1 as a target molecule in the modulation of adipogenesis and osteogenesis from MSCs and examine the role of the HO system in diabetes, inflammation, osteoporosis, hypertension, and other pathologies, a burgeoning area of research.
MSC	23358353	Strategies that target key integrins expressed by MSCs might, therefore, translate into improved therapies for age-related bone loss and possibly other disorders.
MSC	22378497	This indicates that studies of the biologic functions of MSCs in musculoskeletal diseases, including osteoporosis and osteoarthritis, should focus on in vivo MSCs, rather than their culture-adapted progeny.
MSC	23283437	In osteoporosis, differentiation of mesenchymal stem cells (MSCs) improves bone marrow adipogenesis.
MSC	24407712	Such osteoporosis therapies can be carried out by exogenous introduction of mesenchymal stem cells (MSCs), typically procured from bone marrow, adipose, and umbilical cord blood tissues or through treatments with drugs or small molecules that recruit endogenous stem cells to osteoporotic sites.
MSC	22159632	UNLABELLED: Differential osteogenic potential and responsiveness to 17β-estradiol (E2) of mesenchymal stem cells (MSCs) were found between postmenopausal women with osteoporosis (OP) and osteoarthritis (OA).
MSC	11393789	To examine the effect of aging and osteoporosis on the MSC population, we quantified the number of MSCs and their proliferative capacity in vitro.
MSC	21308778	Thus telomerization of MSCs may provide a novel approach for abolishing age-related bone loss.
MSC	25887871	Apoptosis of bone marrow-derived mesenchymal stem cells (BM-MSCs) has been shown to contribute to the development of osteoporosis, which is often the result of long-term use of glucocorticoid drugs such as dexamethasone (Dex).
MSC	23598412	During the process of aging, especially for postmenopausal females, the cell lineage commitment of mesenchymal stem cells (MSCs) shift to adipocyte in bone marrow, resulting in osteoporosis.
MSC	7876320	Generalized conditions, such as osteoporosis, may be treatable by systemic administration of culture-expanded autologous MSCs or through biopharmaceutical regimens based on the discovery of critical regulatory molecules in the differentiation process.
MSC	23795945	Because age-related bone loss is associated with increased bone marrow fat, we also evaluated the capacity of PI-treated MSCs to differentiate into adipocyte.
MSC	26215588	Patients with the systemic disease osteoporosis show altered MSC properties, reduced bone formation and mineral density followed by increased bone fragility and high fracture incidence.
MSC	24948012	We propose that sLZIP is a novel PPARγ2 modulator for control of the balance between adipogenesis and osteogenesis during MSC differentiation, and that sLZIP can be used as a therapeutic target molecule for treatment of obesity, osteodystrophy, and osteoporosis.
MSC	25063060	CONCLUSIONS: These data suggest that MSCs are aging in osteoporosis body, and autologous OVX MSCs transplantation is not appropriate to treat osteoporosis if necessary.
MSC	23840221	In this review, we summarize the involvement of Gas7 in MSC-based osteogenesis and osteoporosis and describe the possible mechanisms responsible for the maintenance of cellular homeostasis in MSCs and osteoblasts.
MSC	26191132	Adipocytes and osteoblasts are derived from MSCs, and decreased osteoblastogenesis and increased adipocytes may be a primary cause of postmenopausal osteoporosis (PMO).
MSC	24175668	Osteoporosis causes reduction of osteogenic differentiation of mesenchymal stem cells (MSCs) from bone marrow and adipose tissue.
MSC	12383369	OBJECTIVE: Ex vivo gene therapy with the use of human mesenchymal stem cells (hMSCs) and bone morphogenetic protein (BMP) genes provides a local supply of precursor cells and a supraphysiological dose of osteoinductive molecules that may promote bone formation in patients with inadequate hMSC populations because of age, osteoporosis, metastatic bone disease, iatrogenic depletion, or other metabol…
MSC	18782003	Involvement of adipogenic potential of human bone marrow mesenchymal stem cells (MSCs) in osteoporosis.
MSC	26273495	New strategies for osteoporosis treatments have aimed to control the fate of MSCs.
MSC	16127003	IBM-BMT is applicable to regeneration therapy and various age-associated diseases such as osteoporosis, because it can efficiently recruit donor-derived normal MSCs into the bone marrow.
MSC	25063060	METHODS: MSCs were obtained from osteoporosis rat, and proliferation potency and impaired osteogenic differentiation potential were determined.
MSC	11437329	Moreover, hMSCs obtained from osteoporotic patients can restore their osteogenic activity following human BMP-2 gene transduction, an important finding in the future planning of gene therapy treatment for osteoporosis.
MSC	20628571	Excessive accumulation of bone marrow adipocytes observed in senile osteoporosis or age-related osteopenia is caused by the unbalanced differentiation of MSCs into bone marrow adipocytes or osteoblasts.
MSC	24898411	Differentiation of osteoblasts from mesenchymal stem cells (MSCs) is an integral part of bone development and homeostasis, and may when improperly regulated cause disease such as bone cancer or osteoporosis.
MSC	25785147	Thus, manipulating local inflammatory IKK-NF-κB signaling was also found to suppress the anabolic effect of signaling in osteoporotic related fracture emerge as a promising therapy to we hypothesized to use locally delivered IKK small molecule inhibitor to augment the impaired fracture healing ability in osteoporosis patient via enhancing both MSCs osteogenic differentiation and osteoblast functi…
MSC	26273495	This study provides insights into the mechanism of time-sensitive MSC induction in response to mechanical loading, and for the optimal design of osteoporosis treatments.
MSC	23251594	Exercise prevents marrow mesenchymal stem cell (MSC) adipogenesis, reversing trends that accompany aging and osteoporosis.
MSC	19877060	METHODS: We studied the osteogenic differentiation process in MSCs obtained from the peripheral blood of 31 patients with osteoporosis and 20 normal donors.
MSC	25796354	Proliferation and differentiation of rat osteoporosis mesenchymal stem cells (MSCs) after telomerase reverse transcriptase (TERT) transfection.
MSC	22177287	The disruption of balance between osteogenesis and adipogenesis of mesenchymal stem cells (MSCs) leads to the disorders such as osteoporosis.
MSC	12171527	It was found that MSCs play an important role in bone physiology and hematopoiesis, and in part participate in the pathophysiology related to bone diseases, mainly osteoporosis.
MSC	23221481	METHODS: Because the complete mechanism of action of IP6 on osteoblasts is not fully understood and its potential use in the primary prevention of osteoporosis, we examined the direct effect of IP6 on cell viability and differentiation of MC3T3-E1 cells and on differentiation of human umbilical cord mesenchymal stem cells (hUC-MSCs).
MSC	23186800	Low bone formation in osteoporosis is associated with a shift from osteoblastic to adipogenic differentiation of mesenchymal stem cells (MSC) inducing a concomitant lipotoxic milieu within the bone marrow.
MSC	22181705	Although some studies reveal contrasting results, the results of this review suggest that the cellular modifications due to aging and osteoporosis should be carefully considered in relation to the use of MSCs for therapeutic application.
MSC	22890880	Oxidative stress may play a major role in the development of osteoporosis in part by inhibiting osteoblastic differentiation of bone marrow stromal cells (MSCs).
MSC	21810479	The understanding on the mechanism of FSS inducing the osteogenic differentiation of hMSCs will not only be helpful to develop the bone tissue engineering but also provide new targets for drug discovery for treatment of osteoporosis and other related bone-wasting diseases.
MSC	22890880	These results showed that selenite protected MSCs against H₂O₂-induced inhibition of osteoblastic differentiation through inhibiting oxidative stress and ERK activation, which provided, for the first time, the mechanistic explanation for the negative association of selenium status and risk of osteoporosis in terms of bone formation.
MSC	24619559	Thus, bone regeneration, through induction of MSCs, provides a rational therapeutic strategy for preventing or treating age-related osteoporosis.
MSC	23124706	This review describes the advances of animal study and preliminary clinical application in the past few years, related to MSC-based cell therapy in the common bone and joint diseases, including osteoarthritis, rheumatoid arthritis, osteoporosis, osteonecrosis of the femoral head and osteogenesis imperfecta.
MSC	24157044	INTRODUCTION: Adult mesenchymal stem cells (MSCs) have potential to differentiate into various lineages, replacing cells during normal turnover and tissue regeneration to replace damaged or lost adult tissues during osteoporosis and arthritis, or traumatic injuries.
MSC	23283437	In this review, we consider malfunctioning of MSCs as essential for osteoporosis.
MSC	19877060	RESULTS: Circulating MSCs were increased in osteoporosis patients compared with normal donors.
MSC	17323185	According to the guidelines of the Japan Osteoporosis Society, the minimum significant change (MSC) for urinary NTX is defined as a 35% decrease from baseline and the cutoff level for a high risk of future fracture is 54.3 nmol bone collagen equivalent (BCE)/mmol.Cr.
MSC	23519534	The objective of this study was to develop a fluid structure interaction (FSI) model of trabecular bone and marrow to predict the mechanical environment of MSCs in vivo and to examine how this environment changes during osteoporosis.
MSC	22770241	Since histone demethylases are chemically modifiable, KDM4B and KDM6B may present as therapeutic targets for controlling MSC fate choices and lead to clues for new treatment in metabolic bone diseases such as osteoporosis.
MSC	26013661	MATERIAL AND METHODS: qRT-PCR analysis was performed to assess miR-133 expression in MSCs isolated from bone marrow of an ovariectomized (OVX) animal model and postmenopausal osteoporosis patients (PMOP) and their corresponding controls.
MSC	16052487	The effect of atherogenesis related factors including oxysterols on the differentiation and survival of marrow stromal cells (MSCs) would be very important in understanding the link between atherosclerosis and osteoporosis.
MSC	26019793	CONCLUSION: As MSCs are the cellular back up for bone remodeling and repair, we suggest more investigations to be conducted regarding the correlation between the increasing number of patients suffering from osteoporosis and p-NP toxicity.
MSC	25152406	Aim of the study was to scrutinize hMSC for osteoporosis associated alterations in BMP mediated migration and invasion as well as in extracellular matrix (ECM) binding integrin expression.
MSC	25796354	RESULTS: MSCs of osteoporosis rats obviously decreased in proliferation ability and osteogenic differentiation compared to that of normal rats.
MSC	22181705	This review summarizes the literature related to intrinsic and extrinsic characteristics of human bone marrow or adipose tissue MSCs during aging and osteoporosis.
MSC	22886506	The discovery of small molecule that activates the osteogenic differentiation of MSCs could aid in the development of a new anabolic drug for osteoporosis treatment.
MSC	22011754	The aim of the present study was to evaluate the osteoprotective effect of OA in rats with ovariectomy (OVX)-induced osteoporosis and to search for the molecular targets of OA in bone mesenchymal stem cells (bMSCs).
MSC	19215023	The aim of this study was to compare the osteogenic potential and responsiveness to leptin of mesenchymal stem cells (MSCs) from bone marrow between postmenopausal women with osteoarthritis (OA) and osteoporosis (OP).
MSC	23074166	In this study, we screened differentially expressed miRNAs in MSCs derived from estrogen deficiency-induced osteoporosis and found miR-21 was significantly downregulated.
MSC	26273536	Age related defect of the osteogenic differentiation of mesenchymal stem cells (MSCs) plays a key role in osteoporosis.
MSC	15036392	We found a significant reduction of PPARgamma2-expressing cells in 1,25(OH)(2)D(3)-treated (32% +/-6) as compared to vehicle (76% +/-5) treated mice (p<0.01) In summary, this study shows that the administration of 1,25(OH)(2)D(3) in an in vivo model of senile osteoporosis is associated with reduction in PPARgamma2 a key transcription factor for the adipose differentiation of MSC.
MSC	25887871	These results not only demonstrate the role of vanadate in the inhibition of Dex-induced apoptosis of BM-MSCs, but also reveal the therapeutic potential of vanadate in glucocorticoid-mediated osteoporosis.
MSC	23028809	In the present study we aimed to unravel whether MSC biology is directly involved in the pathophysiology of the disease and therefore performed microarray analyses of hMSC of elderly patients (79-94 years old) suffering from osteoporosis (hMSC-OP).
MSC	19758228	Using this new method, we show that most age-associated diseases, such as osteoporosis and emphysema, are MSC disorders and, on the basis of this evidence, propose a new concept of stem cell disorders, including HSC and MSC disorders.
MSC	25796354	In contrast, in TERT-transfected MSC, the proliferation and differentiation ability, and especially the ability of osteogenic differentiation, were significantly higher than in osteoporosis MSC.
MSC	16889506	The aim of this study was to establish an osteoporosis rabbit model by ovariectomy (OVX), characterize the autologous MSCs from the OVX rabbits, and transplant the autologous MSCs into the OVX rabbits.
MSC	16889506	Osteoporosis might be due to defects in mesenchymal stem cells (MSCs) that lead to reduced proliferation and osteoblast differentiation.
MSC	26445510	(2015) reveal that the ability of transplanted MSCs to alleviate osteoporosis in systemic lupus erythematosus is maintained through epigenetic changes conferred by secretory action of the MSCs.
MSC	21744049	This prompted us to investigate whether htMSCs might be useful for the treatment of osteoporosis or other bone diseases, since they present a pronounced capacity for osteogenic differentiation in vitro.
MSC	16052487	These results suggested that Triol might contribute to the decreased bone formation by inhibition of osteoblastic differentiation and promotion of apoptosis of MSCs, providing insights about common factors underlying the pathogenesis of atherosclerosis and osteoporosis.
MSC	23598412	Moreover, the rescue of MSCs lineage commitment disorder by regulating miRNAs expression suggested a novel potential therapeutic target for osteoporosis as well as stem cell-mediated regenerative medicine.
MSC	23827126	Inflammation as it pertains to obesity and osteoporosis and how EPA and DHA can alleviate the associated inflammation will be discussed, followed by some preliminary evidence to show how mesenchymal stem cell (MSC) lineage commitment may be altered by inflammation to favor adipogenesis.
MSC	26206089	Elucidation of the molecular mechanisms that regulate MSC differentiation into osteoblasts is of great importance for the development of anabolic therapies for osteoporosis and other bone metabolism-related diseases.
MSC	23028809	In addition, we compared the osteoporotic transcriptome to long term-cultivated, senescent hMSC and detected some signs for pre-senescence in hMSC-OP.Our results suggest that in primary osteoporosis the transcriptomes of hMSC populations show distinct signatures and little overlap with non-osteoporotic aging, although we detected some hints for senescence-associated changes.
MSC	18782003	The protective effect exerted by locally generated factors, such as estradiol and leptin, on MSCs differentiation was analyzed, because altered bioavailability of these factors may play a part in osteoporosis triggering.
MSC	25670060	However, age-related changes in MSCs lead to the loss of differentiation potential, loss of proliferation potential and increase in senescent cell numbers, which involve a steady loss of bone mass and frequently result in osteoporosis.
MSC	25152406	In conclusion, we here demonstrate for the first time osteoporosis associated alterations in BMP mediated hMSC recruitment.
MSC	26013661	MiR-133 can induce postmenopausal osteoporosis by weakening osteogenic differentiation of hMSCs, at least partly through repressing SLC39A1 expression.
MSC	25063060	There will be a possibility in establishing a new clinical application of MSCs autologous transplantation to treat osteoporosis, if OVX MSCs have stronger proliferation and differentiation.
MSC	19113920	To our knowledge, this is the first report to show unequivocally the feasibility of ameliorating glucocorticoid-induced osteoporosis by systemic transplantation of genetically manipulated MSCs.
MSC	17383482	In recent years, the pivotal importance of anabolic therapies in the setting of osteoporosis in which bone mass is substantially increased above and beyond what is attainable with the bisphosphonate class of drugs has put MSC biology firmly on the scientific agenda.
MSC	18958757	In addition, IBM-BMT is applicable to regeneration therapy and various age-associated diseases such as osteoporosis, since it can efficiently recruit donor-derived normal MSCs.
MSC	24656062	METHODS: The gene expression profile of primary osteoporosis GSE35956 was downloaded from the GEO (Gene Expression Omnibus) database and included five MSC (mesenchymal stem cell) specimens of normal osseous tissue and five MSC specimens of osteoporosis.
MSC	19839776	We previously reported that specific oxysterols stimulate osteogenic differentiation of pluripotent bone marrow stromal cells (MSCs) through activation of hedgehog (Hh) signaling and may serve as potential future therapies for intervention in osteopenia and osteoporosis.
MSC	17917030	In addition, IBM-BMT is applicable to regeneration therapy and various age-associated diseases such as osteoporosis, since it can efficiently recruit donor-derived normal MSCs.
MSC	25771989	A total of 14 human MSC samples were available, including five samples from elderly patients suffering from osteoporosis, five controls from young non-osteoporotic donors and five controls from old non-osteoporotic donors.
MSC	20736793	INTRODUCTION: It has been previously shown that in patients with osteoporosis, mesenchymal stem cell (MSC) growth rate and osteogenic potential is decreased contributing to inferior fracture consolidation.
MSC	24463781	Thus, our unique culture platform combined with post-culture multivariate analysis provided a novel insight into cellular interactions within the MSC microenvironment and highlights the necessity of multi-cellular culture systems for further investigation of complex pathologies such as diabetes and osteoporosis.
MSC	24948012	Disruption of the balance during MSC differentiation leads to obesity, skeletal fragility, and osteoporosis.
MSC	23283437	In osteoporosis, the reciprocal balance between the two differentiation pathways is altered, facilitating adipose accretion in bone marrow at the expense of osteoblast formation; suggesting that under this condition MSCs activity and their microenvironment may be disturbed.
MSC	24657587	The current study confirms that Sal B promotes osteogenesis of hMSCs with no cytotoxicity, and it may be used as a potential therapeutic agent for the management of osteoporosis.
MSC	21723263	This inverse relationship in theory at least partially underlies the clinical entity of osteoporosis, in which marrow mesenchymal stem cells (MSCs) have a predilection for adipose differentiation that increases with age.
MSC	19419706	In this review we summarize evidence of MSC involvement in age related bone loss and suggest new emerging targets for intervention.
MSC	12868700	The distribution of the Taq 1 polymorphism in the vitamin D receptor (VDR) gene and the MSc 1 polymorphism in the collagen 1 alpha 1 (COL1A1) gene were studied in 266 female and 55 male patients attending an osteoporosis clinic.
MSC	24123709	An imbalance between normal adipogenesis and osteogenesis by mesenchymal stem cells (MSCs) has been shown to be related to various human metabolic diseases, such as obesity and osteoporosis; however, the underlying mechanisms remain elusive.
MSC	23722883	These results suggest that AOPPs inhibit the proliferation and osteogenic differentiation of MSCs, possibly through the AOPPs-RAGE-ROS pathway; this may be an important mechanism in the development of osteoporosis.
MSC	26088863	Human and animal model studies indicate that aging affects two aspects of mesenchymal stem cell (MSC): a decrease in the bone marrow MSC pool and biased differentiation into adipocyte at the cost of osteoblast, which underlie the etiology of osteoporosis.
MSC	11437329	Importantly, the same results were obtained with hMSCs isolated from a patient suffering from osteoporosis.
MSC	25063060	OBJECTIVE: To explore decreased proliferation ability and differentiation potential of mesenchymal stem cells (MSCs) of osteoporosis rat.
MSC	26190894	MSCs in vitro can be directed to osteogenic lineage by dexamethasone (DEX); however, the use of DEX is not practical in clinical settings because of adverse side effects such as glucocorticoid-induced osteoporosis.
MSC	25738155	Osteoporosis can be associated with the disordered balance between osteogenesis and adipogenesis of bone marrow-derived mesenchymal stem cells (BM-MSCs).
MSC	23283437	Our observations indicate that intrinsic properties of MSCs are disturbed in osteoporosis.
MSC	25796354	BACKGROUND: The aim of this study was to determine whether MSC are excellent materials for MSCs transplantation in the treatment of osteoporosis.
MSC	22480730	MSCs also have the potential to home to bone after systemic administration, which could serve as a useful way to deliver transgenes in a disseminated fashion for the treatment of diseases affecting the whole skeleton, such as osteoporosis or osteogenesis imperfecta.
MSC	25541697	MSCs have been investigated for the treatment of many musculoskeletal disorders, including osteoarthritis and osteoporosis.
MSC	21432897	An unexpected side effect of some classes of anticoagulants has been osteoporosis which may be, at least in part, related to deranged mesenchymal stem cell (MSC) function.
MSC	18608349	BACKGROUND: Mesenchymal stromal cells (MSC) are an invaluable tool for research and therapeutic application regarding degenerative diseases such as osteoporosis.
MSC	15684696	In an effort to develop ex vivo gene therapy for osteoporosis, we used gene-modified MSCs in a preclinical mouse model to determine the efficiency of transduction of murine MSCs by recombinant adeno-associated virus 2 (AAV) vectors carrying reporter genes and determined their osteogenic potential after recombinant AAV-mediated expression of bone morphogenic protein 2, known to induce osteoblast d…
MSC	21812028	These results indicate that the lineage fate determination of mesenchymal stem cells (MSCs) is influenced by cell energy metabolism and points to a possible mechanism for the development of senile osteoporosis.
MSC	23074166	Inflammatory cytokines, especially tumor necrosis factor α (TNF-α), have been shown to inhibit osteogenic differentiation of mesenchymal stem cells (MSCs) and bone formation in estrogen deficiency-induced osteoporosis, but the mechanism responsible remains poorly understood.
MSC	17493217	The direct impairment of proliferation and osteogenic differentiation potential of MSC by irradiation may contribute partly to the post-transplant osteoporosis.
MSC	20404939	OVERVIEW OF LITERATURE: Many studies have correlated osteogenic potential of in vitro cultured MSCs with aging or osteoporosis.
MSC	24338342	Aging favors the bone marrow MSC differentiation toward the former, causing a loss of bone density associated with pathologies like osteoporosis.
MSC	20674581	These findings can be applied for improving MSCs survival in stem-cell transplantation, bone-marrow transplantation, treatment of bone diseases such as osteoporosis and chemotherapy.
MSC	24548409	Both adipocytes and osteoblasts are known to originate from common MSCs, and the balance between adipogenesis and osteogenesis in MSCs is reported to modulate the progression of various human diseases, such as obesity and osteoporosis.
MSC	25771989	OBJECTIVE: To explore the role of aging in the pathogenesis of osteoporosis, several differentially expressed genes (DEGs) and altered biological pathways were identified in mesenchymal stem cells (MSCs) in elderly patients with osteoporosis.
MSC	24682582	The proliferation and osteogenic capacity of mesenchymal stem cells (MSCs) needs to be improved for their use in cell-based therapy for osteoporosis.
MSC	21444814	Elucidating the molecular mechanisms that regulate human stromal (mesenchymal) stem cell (hMSC) differentiation into osteogenic lineage is important for the development of anabolic therapies for treatment of osteoporosis.
MSC	19877060	Several genes contribute to normal osteoblastic differentiation from mesenchymal stem cells (MSCs), but an understanding of their role in the pathogenesis of osteoporosis is still lacking.
MSC	23598406	These data show for the first time that the FasL/Fas system can have a role in BM-MSC biology via regulation of both proliferation and adipogenesis, and may have clinical relevance because circulating Fas/FasL levels decline with age and several age-related conditions, including osteoporosis, are characterized by adipocyte accumulation in BM.
MSC	25796354	MATERIAL AND METHODS: We studied normal, osteoporosis, and TERT-transfected MSC from normal and osteoporosis rats to compare the proliferation and osteogenic differentiation using RT-PCR and Western blot by constructing an ovariectomized rat model of osteoporosis (OVX).
MSC	21336871	CONCLUSION: CUGFR induces the differential differentiation of MSCs, potentially suppressing bone formation and favoring catch-up fat, which might be responsible for the increased risk of osteoporosis and obesity during CUGFR.
MSC	23991002	Here, we combined high through-put sequencing with computational techniques to detect miRNAs dynamics in MSCs and bone tissue of age-related osteoporosis.
MSC	24353896	Gene expression differences in MSCs and their relevance to osteoporosis.
MSC	23598412	In conclusion, our findings showed that redundant miR-705 and miR-3077-5p synergistically mediated the shift of MSCs cell lineage commitment to adipocyte in osteoporosis bone marrow, providing new insight into the etiology of osteoporosis at the post-transcriptional level.
MSC	21289500	In osteoporosis, a metabolic bone disease seen mainly in postmenopausal women because of estrogen deficiency, the concomitant occurrence of increased bone marrow adipocyte production with diminished production of osteoblasts, points to the potential role of estrogen in shifting the balance of MSC differentiation.
MMP13	16919424	These findings indicate that loss of estrogen in vivo could potentially lead to enhanced expression of MMP-13, a proteinase that has been implicated in both osteoporosis and osteoarthritis, and thus contribute to the development and progression of these conditions.
MMP13	21452281	Among the most distinctly expressed genes were Wnt antagonists DKK1 and SOST, the transcription factor SOX4, and the bone matrix proteins MMP13 and MEPE, all reduced in osteoporosis versus control groups.
RGN	20349117	This review proposes that regucalcin relates in osteoporosis and hyperlipidemia, and that the regucalcin TG rat model may be useful in determining the pathophysiologic state and the development of therapeutic tool for osteoporosis and hyperlipidemia.
RGN	20349117	Regucalcin and metabolic disorders: osteoporosis and hyperlipidemia are induced in regucalcin transgenic rats.
RGN	15702226	Regucalcin transgenic rat may be useful as an animal model in osteoporosis and hyperlipidemia.
DEC1	24397494	On the other hand, the DEC1 expression decreases in tibia bone marrow side of ovariectomy mice compared with that in sham-operated mice, and E2 treatment ameliorates the decrease of DEC1 expression induced by bilateral ovariectomy and prevents osteoporosis in ovariectomized mice .
SLC33A1	19142215	In the present study, we selected telmisartan and valsartan as representatives of angiotensin AT1 receptor antagonists and used ovariectomized (OVX) rats as a model of human postmenopausal osteoporosis.
SLC33A1	21847764	The osteoporosis program has now moved from a provider and allied provider empowerment focus to reorganizing our thoughts about how to best manage osteoporosis care across our healthcare system by defining and acting on four major osteoporosis care gaps: (1) at-risk patients do not get tested, (2) tested patients are not accurately risk assessed, (3) high-risk patients do not get treated, and (4)…
SLC33A1	25912907	On the other hand, AT1 receptor signaling has detrimental effects, such as promoting various aging-related diseases that include cardiovascular diseases, diabetes, chronic kidney disease, dementia, osteoporosis, and cancer.
SLC33A1	19142215	Recently, however, concern has been raised that use of angiotensin AT1 receptor antagonists may increase the tendency to develop postmenopausal osteoporosis by decreasing transforming growth factor-beta1 (TGF-beta1), which has been implicated in bone mass maintenance.
SLC33A1	23087139	Therefore, it is tempting to speculate that drugs, including AT1 receptor blockers, may be used for the treatment of osteoporosis or reduction of its detrimental effects in the future.
SLC33A1	18847324	Finally, treatment of THM mice with an ACE inhibitor, enalapril, improved osteoporosis and hypertension, whereas treatment with losartan, an angiotensin receptor blockers specific for AT1, resulted in exacerbation of the low bone mass phenotype.
PROP1	23624138	PROP-1 gene mutations in a 63-year-old woman presenting with osteoporosis and hyperlipidaemia.
DCLK3	20865113	Conditional logistic regressions (CLR) were used to calculate risk of PD after diagnosis of the estrogen-related diseases, endometriosis and osteoporosis, conditioning on years of birth and enrollment.
DCLK3	12844211	Data on 13,831 men and women aged 20+ from the Third National Health and Nutrition Examination Survey, 1988-1994 (NHANES III) were used to study the occurrence of compromise in renal clearance function in men and women with osteopenia and osteoporosis.
SLC6A4	22037240	Recently, serotonin transporters have been described in bone, raising the question of whether medications that block serotonin reuptake could affect bone metabolism and ultimately affect osteoporosis-related fractures.
SLC6A4	21483275	AIM: To study the association of serotonin transporter gene polymorphisms and osteoporosis.
SLC6A4	21483275	CONCLUSIONS: As far as we know, this is one of the few studies that report an association between 5HTTVNTR and osteoporosis opening the hypothesis that the determination of this specific serotonin transporter gene polymorphism may contribute to the identification of individuals at high risk for the development of osteoporosis.
SLC6A4	21483275	Association of serotonin transporter gene polymorphism 5HTTVNTR with osteoporosis.
SOD2	23329517	Of them, STAT1, CXCL10, SOCS3, ADM, THBS1, SOD2, and ERG2 have been demonstrated involving in osteoporosis.
SOD2	21773993	An integrative study ascertained SOD2 as a susceptibility gene for osteoporosis in Chinese.
SOD2	21773993	In conclusion, this integrative evidence from DNA, RNA, and protein levels support SOD2 as a susceptibility gene for osteoporosis.
SOD2	22089180	Furthermore, antioxidant enzymes have been observed to have low protective activity in women with osteoporosis.The aim of the present study was to examine any association of selected gene polymorphisms of the glutathione S-reductase (GSR), superoxide dismutase (SOD1 and SOD2), and catalase (CAT) genes, alone or in combination, with the bone mineral density (BMD) values of femoral neck (fn), lumba…
SOD2	25364766	The most significant gene SOD2 has been identified in our previous osteoporosis study involving the same expression dataset.
SOD2	25757953	In summary, Sirt3-MnSOD axis was identified as a negative component in nicotine-induced mitochondrial oxidative stress and mtDNA damage, and MnTBAP may serve as a potential therapeutic drug for osteoporosis.
SOD2	25779629	These findings demonstrate that the mitochondrial superoxide induced in osteocytes by Sod2 ablation causes age-related bone loss due to the impairment of canalicular networks and bone metabolism via the deregulation of the sclerostin and RANKL expression.
CYTH1	15826746	METHODS: Sixty patients with prostate cancer and osteoporosis were enrolled and randomly assigned to 2 different treatment regimes: group A (30 patients) treated with maximum androgenic blockage (MAB), and group B (30 patients) treated with bicalutamide 150 mg. Each group was divided in 2 subgroups A1-A2 and B1-B2.
AES	23315281	Key words searched included: adverse effects (AEs), aged, alendronate, atrial fibrillation, atypical fractures, bisphosphonate-associated osteonecrosis of the jaw, bisphosphonates, diaphyseal fractures, gastrointestinal cancer, ibandronate, musculoskeletal pain, osteoporosis, risedronate, subtrochanteric fractures, and zoledronic acid.
AES	12730532	Of these adverse events (AEs), osteoporosis is considered the most serious.
AES	19762359	Osteoporosis, diabetes and cardiovascular diseases were ranked among the five most worrisome AEs by patients and rheumatologists.
AES	22018196	Both patients and rheumatologists expressed concerns about AEs like osteoporosis, diabetes and cardiovascular diseases.
AES	24786783	The costs of more common AEs, such as osteoporosis, obesity, diabetes, and fractures, ranged from $1190 to $8220.
AES	24996529	The outcomes of osteoporosis evaluated include primary outcome as bone mineral density (BMD) at different skeletal sites, and secondary outcomes, including adverse events (AEs), such as incidence of skin AEs, fracture, and serious adverse events (SAEs).
AES	22417072	Several studies suggest that NAs long-term administration have been associated with low rates of serious adverse events (AEs), including lactic acidosis, renal function impairment, osteopenia and osteoporosis.
AES	20399982	Preclinical and other clinical trials of zoledronic acid for the treatment of osteoporosis or other indications did not identify an effect on AF AEs.
NDUFA6	5696550	Group C was of women of European origin.Severe osteoporosis occurred in three cases from group A, two from group B, and 14 from group C. Lesser degrees of osteoporosis could not be assessed precisely enough for inclusion in these figures.
MIER1	23137636	In this study, we have investigated the association between osteoporosis and osteocalcin (BGLAP) -298 C>T, estrogen receptor 1 (ER1) 397 T>C, collagen type1 alpha 1 (Col1A1) 2046 G>T and calcitonin receptor (CALCR) 1340 T>C polymorphisms.
MIER1	23137636	However, ER1 CC genotype compared with TT+TC genotypes was found to increase the two fold the risk of osteoporosis [p=0.039, OR=2.156, 95% CI (1.083-4.293)] and CALCR CC genotype compared with TT+TC genotypes was found to have protective effect against osteoporosis [p=0.045, OR=0.471, 95% CI (0.237-0.9372)].
TOP3A	15577121	Osteoporosis is among the top 3 medical conditions that are associated with greatest morbidity and reduction of quality of life of Hong Kong elderly subjects.
COX15	25785089	MAPK3, MAP3K10, MAP3K9, COX10, COX15, ATIC, UMPS and HPRT1 might participate in the pathogenesis of osteoporosis.
NDUFAB1	22391994	Simvastatin released from the gel containing 0.5% of ACP showed high therapeutic effect on osteoporosis rat.
NDUFAB1	18794560	RECOMMENDATION 3: ACP recommends that clinicians choose among pharmacologic treatment options for osteoporosis in men and women on the basis of an assessment of risk and benefits in individual patients (Grade: strong recommendation; moderate-quality evidence).
NDUFAB1	18794560	RECOMMENDATION 4: ACP recommends further research to evaluate treatment of osteoporosis in men and women.
NDUFAB1	18794560	RECOMMENDATION 2: ACP recommends that clinicians consider pharmacologic treatment for men and women who are at risk for developing osteoporosis (Grade: weak recommendation; moderate-quality evidence).
NDUFAB1	18794560	DESCRIPTION: The American College of Physicians (ACP) developed this guideline to present the available evidence on various pharmacologic treatments to prevent fractures in men and women with low bone density or osteoporosis.
NDUFAB1	18794560	RECOMMENDATION 1: ACP recommends that clinicians offer pharmacologic treatment to men and women who have known osteoporosis and to those who have experienced fragility fractures (Grade: strong recommendation; high-quality evidence).
NDUFAB1	19221388	Is too much intervention recommended in the ACP osteoporosis treatment guidelines?
NDUFAB1	25641192	A high activity of acid phosphatase (AcP) is associated to several diseases (osteoporosis, Alzheimer's, prostate cancer, among others) and makes it a target for the development of new potential inhibitors.
NDUFAB1	22391994	Therapeutic effects of the ACP-containing alginate gel which slowly releases a drug, simvastatin, on osteoporosis model rats were examined.
CD4	22819139	In addition to postmenopausal women, we recommend osteoporosis screening for HIV-infected men older than 60 yr, men younger than 60 yr with BMI < 20 kg/m(2), and men younger than 60 yr with both BMI 20-23 kg/m(2) and a CD4 T-cell nadir ≤ 200/mm(3).
CD4	22819139	Factors associated with low bone mineral density comprised not only classical risk factors for osteoporosis such as low body mass index (BMI) or older age but also factors associated with HIV infection such as lower CD4 T-cell nadir in men and AIDS in women, and with antiretroviral treatment such as recent tenofovir therapy.
CD4	23943825	ART initiation at higher CD4(+) counts may reduce the burden of osteoporosis and fragility fractures.
CD4	26366785	Of 653 participants included in this analysis (77% male, 29% black, median age 41 years, median CD4(+) cell count 464 cells/mm(3), 89% with HIV RNA <400 copies/ml), 51% and 10% had baseline osteopenia and osteoporosis, respectively.
CD4	19876583	UNLABELLED: The phenotypic and functional characteristics of immune cells of osteoporotic women compared to healthy controls similar for age and estrogen level showed for the first time significant changes in several B lymphocytes populations in postmenopausal osteoporosis, related to bone mineral density (BMD) and fractures, and a significant lower basal secretion of interferon-gamma (IFN-gamma)…
CD4	23590676	This interaction can result in adrenal insufficiency and iatrogenic Cushing's syndrome (with symptoms such as rapid weight gain, obesity, facial hirsutism and swelling), as well as hypertension, osteoporosis and decreased CD4 cell count.
CD4	21562872	To date, no study has been carried out to explain the relationship between CD4(+)CD28null T cells and ovariectomy or osteoporosis.
CD4	1972874	High CD4 is thus associated with a low level of osteoclastic bone resorption or low turnover osteoporosis.
CD4	25711332	CONCLUSIONS: In this geographically and racially diverse population of ART-naïve adults with normal CD4 cell counts, low BMD was common, but osteoporosis was rare.
CD4	1972874	Senile osteoporosis of low turnover thus appears to be associated with vitamin D deficiency, low macrophage function, high CD4 lymphocyte proportion, low IL-1 and high IL-2 activity, low IFN alpha and high IFN gamma activity, and low TGF beta and TNF alpha activity.
SEMA4D	25088728	The findings from the present study demonstrate a novel and promising site-specific therapeutic option for the treatment of osteoporosis via interference of the sema4D-plexin cell communication pathway between osteoclasts and osteoblasts.
SEMA4D	22019888	Notably, Sema4D-specific antibody treatment markedly prevented bone loss in a model of postmenopausal osteoporosis.
SEMA4D	25252878	Semaphorin 4d (Sema4d) has been proposed as a novel target gene for the treatment of osteoporosis.
SEMA4D	25252878	The results from the present study demonstrate that an osteoporotic condition significantly increases alveolar bone height loss, and that the therapeutic effects via bone-targeting systems featuring interference of Sema4d are able to partly counteract alveolar bone loss caused by osteoporosis.
ITLN1	25980946	The aim of the study was to evaluate frequency of polymorphism 326A/T of gene ITLN-1 and assessment of its relations with the clinical parameters of osseous turnover and degree of postmenopausal osteoporosis.
SQRDL	26258864	To assess whether the SQRDL I264T variant played a functional role in the pathogenesis of osteoporosis, we examined the in vitro effect of the nsSNP on bone remodeling.
SQRDL	26258864	Based on the results of an in silico prediction of the protein's functional effect based on amino acid alterations and a sequence conservation evaluation of the amino acid residues at the positions of the nsSNPs among orthologues, we selected one nsSNP in the SQRDL gene (rs1044032, SQRDL I264T) as a meaningful genetic variant associated with postmenopausal osteoporosis.
SQRDL	26258864	Association of the I264T variant in the sulfide quinone reductase-like (SQRDL) gene with osteoporosis in Korean postmenopausal women.
SQRDL	26258864	In conclusion, the results of the statistical and experimental analyses indicate that the SQRDL I264T nsSNP may be a significant susceptibility variant for osteoporosis in Korean postmenopausal women that is involved in osteoblast differentiation.
UGT2B17	26528103	RESULTS: No significant association was found between osteoporosis and polymorphisms in ESR1, UGT2B17, or UGT1A1 in both groups, suggesting that BSO might be a more significant physiological factor in influencing bone mass density compared to genetic variations.
UGT2B17	18992858	Genome-wide copy-number-variation study identified a susceptibility gene, UGT2B17, for osteoporosis.
UGT2B17	18992858	Our findings suggest the important contribution of CNV of UGT2B17 to the pathogenesis of osteoporosis.
UGT2B17	20878390	We found no evidence of association between UGT2B17 CNV and osteoporosis risk in this population.
UGT2B17	20878390	METHODS: We used a quantitative real-time PCR assay for genotyping the UGT2B17 CNV in a well-characterized population study of 1,347 Caucasian women aged 75.2 ± 2.7 years (mean ± SD), to assess the effect of the CNV on bone mass density (BMD) at the total hip site and osteoporosis risk.
UGT2B17	20878390	Homozygous deletion of the UGT2B17 gene is not associated with osteoporosis risk in elderly Caucasian women.
UGT2B17	26528103	CONCLUSIONS: These results suggest that the ESR1, UGT2B17, and UGT1A1 polymorphisms are not genetic factors affecting osteoporosis in postmenopausal Japanese women.
UGT2B17	20878390	CONCLUSIONS: These data suggest that quantitative real-time PCR is a rapid and efficient technique for determination of candidate CNVs, including the UGT2B17 CNV; however, we found no evidence of an effect of UGT2B17 CNV on osteoporosis risk in elderly Caucasian women.
UGT2B17	26528103	Polymorphisms of estrogen metabolism-related genes ESR1, UGT2B17, and UGT1A1 are not associated with osteoporosis in surgically menopausal Japanese women.
UGT2B17	26528103	Polymorphisms of estrogen receptor 1 (ESR1) and UDP-glucuronosyl transferase (UGT) genes UGT2B17 and UGT1A1 were analyzed, and their association with bone mass and osteoporosis was statistically evaluated.
UGT2B17	23927372	The association of the UGT2B17 CNV with AS is particularly interesting given the recent association of this CNV with osteoporosis and the proposed function as it encodes a key enzyme that inhibits androgens.
SERPINA6	3642211	These alterations need not necessarily affect total plasma cortisol values, but rather affect the relationship of cortisol to its plasma carrier protein, transcortin, since changes in this relationship are a common occurrence in many of the conditions associated with osteoporosis.
SERPINA6	3642211	The multifactorial nature of osteoporosis: the potential of corticosteroid-binding globulin as a unifying regulator.
NDST1	21193039	Considering the pivotal role of 17β-HSDs in steroid hormone modulation and their substrate specificity, these proteins are promising therapeutic targets for diseases like breast cancer, endometriosis, osteoporosis, and prostate cancer.
NDST1	20645882	The therapeutic potential of this enzyme family, especially for the treatment of breast cancer, prostate cancer, acne and osteoporosis, then stimulated the development of inhibitors of 17beta-HSDs and important progress was achieved over the last years.
PTK2B	9817025	There has been enormous effort in the development of PTK inhibitors for diseases such as cancer, psoriasis, and osteoporosis.
GOT1	14669826	Fourteen men with primary osteoporosis, mean age 57 +/- 12 yr (range: 40-73), received 2-mg ibandronate iv every 3 months over 2 yr. All got 1 g/day calcium and 880 UI/day vitamin D for 2 yr.
CDK5RAP2	23884027	In the group of patients undergoing MBT for more than 10 years (group A) and for 3 to 10 years (group B) a reduced frequency of osteopenia and osteoporosis was detected (35.8% and 7.6% group A; 38.4% and 8.5% group B, respectively) compared to controls (group C) (48.9% and 23.4%, P&lt;0.01 and P&lt;0.001).
SOX4	21452281	Among the most distinctly expressed genes were Wnt antagonists DKK1 and SOST, the transcription factor SOX4, and the bone matrix proteins MMP13 and MEPE, all reduced in osteoporosis versus control groups.
MBL2	24579967	Also, we investigated association between MBL serum concentrations and osteoporosis in postmenopausal women.
MBL2	24579967	The results do not suggest association of functional polymorphism of MBL2 gene and MBL serum concentration with osteoporosis in postmenopausal females.
MBL2	26334497	CONCLUSIONS: Osteoporosis (as evaluated by MCI) does not pose a risk for the development of greater MBL.
MBL2	24579967	Association of mannose-binding lectin 2 (mbl2) gene heterogeneity and its serum concentration with osteoporosis in postmenopausal women.
MBL2	26334497	The aims of this study are as follows: 1) to evaluate the possibility of a correlation between osteoporosis, as measured by the mandibular cortical index (MCI), and MBL and 2) to assess how various systemic diseases, periodontitis, and placement of implants in regenerated bone are correlated with MBL and MCI.
MBL2	24579967	Genetic codons' variations were determined by PCR-RFLP and MBL in serum was measured by ELISA method in 75 postmenopausal women (37 with osteoporosis and 38 apparently healthy, non-osteoporotic women serving as a control).
MBL2	24579967	The aim of the study was to detect prevalence of MBL2 exon 1 (codons 52, 54 and 57) genetic polymorphism in postmenopausal women in Bosnia and Herzegovina and its possible role as genetic risk factor for susceptibility to occurrence of osteoporosis in this study group.
MBL2	26334497	BACKGROUND: Fitting implants in osteoporotic patients has traditionally been controversial, and there is little scientific evidence relating osteoporosis to marginal bone loss (MBL).
MBL2	24579967	Serum MBL levels were not significantly different between osteoporosis and control group (492 (37-565.1) and 522.6 (477-559.4) ng/mL respectively, p=0.206).
NGF	19481238	Eight hundred abstracts containing the keyword NGF and 1 of the following terms were reviewed: arthritis, neurogenic inflammation, rheumatoid arthritis, osteoarthritis, collagen arthritis, arteritis, psoriasis, psoriatic arthritis, Sjogren syndrome, systemic lupus erythematosus, gout, osteoporosis, lower back pain, lumbar disc herniation, nerve root compression, spondyloarthritis, spondylarthropa…
RNF185	24727453	Taken together, our results indicate that RNF185 negatively regulates osteogenesis through the degradation of Dvl2 and down-regulation of canonical Wnt signaling pathway and suggest a possible therapeutic target in osteoporosis.
GK	6249182	Two brothers with a recently described inborn error of metabolism characterized by glyceroluria, hyperglycerolemia, and generalized glycerol kinase deficiency had moderate psychomotor retardation, spasticity, growth failure, a nonspecific myopathy, osteoporosis, and adrenal insufficiency.
EIF3B	25785089	MAPK3, MAP3K10, MAP3K9, COX10, COX15, ATIC, UMPS and HPRT1 might participate in the pathogenesis of osteoporosis.
NR4A2	12899514	There are already successes, as noted by 1alpha,25(OH)2D3 (Roche, and Abbott) for renal osteodystrophy and osteoporosis and 1alpha(OH)D3 (Leo, Chugai, Teijin) for renal osteodystrophy and (in Japan) osteoporosis, 1alpha,24(OH)2-24-cyclopropyl-D3 (Dovonex) and 1alpha,24(OH)2D3 (Teijin) for psoriasis, and 19-nor-1alpha,25(OH)2D2 (Abbott) for renal osteodystrophy, as well as drugs under active devel…
PIR	17592115	In fact, bone erosion and osteoporosis, but not inflammation, caused by aberrant TNF-alpha expression were ameliorated in mice deficient in Fc receptor common gamma subunit or beta(2)-microglobulin, in which the expression of PIR-As and PIR-A ligands is impaired, respectively.
AK3	22028037	Rare mutations in EIF2AK3 cause Wolcott-Rallison syndrome (OMIM 226980), an autosomal recessive disorder characterized by diabetes, epiphyseal dysplasia, osteoporosis, and growth retardation.
AK3	22028037	To investigate the role of common genetic variation in EIF2AK3 as a determinant of bone mineral density (BMD) and osteoporosis, we sequenced all exons and flanking regions, then genotyped six potentially functional single nucleotide polymorphisms (SNPs) in this gene in 997 Amish subjects for association analysis, and attempted replication in 887 Mexican Americans.
UGT1A1	26528103	CONCLUSIONS: These results suggest that the ESR1, UGT2B17, and UGT1A1 polymorphisms are not genetic factors affecting osteoporosis in postmenopausal Japanese women.
UGT1A1	23991474	Potential influence of UGT1A8 genotype on osteoporosis and breast cancer treatment outcome.
UGT1A1	26528103	RESULTS: No significant association was found between osteoporosis and polymorphisms in ESR1, UGT2B17, or UGT1A1 in both groups, suggesting that BSO might be a more significant physiological factor in influencing bone mass density compared to genetic variations.
UGT1A1	26528103	Polymorphisms of estrogen metabolism-related genes ESR1, UGT2B17, and UGT1A1 are not associated with osteoporosis in surgically menopausal Japanese women.
UGT1A1	26528103	Polymorphisms of estrogen receptor 1 (ESR1) and UDP-glucuronosyl transferase (UGT) genes UGT2B17 and UGT1A1 were analyzed, and their association with bone mass and osteoporosis was statistically evaluated.
CALB1	15040837	CONCLUSION: Calbindin-D28k, a natural non-oncogenic protein, could be an important target in the therapeutic intervention of glucocorticoid-induced osteoporosis.
B3GAT1	24113716	Fluorinated 1-arylethanols are important building blocks in medicinal chemistry especially for preparing kinase inhibitors for cancer therapy, NK1 receptor antagonists and drugs used in treatment of osteoporosis.
B3GAT1	23549442	NK1-R antagonist is not recommended for the treatment of estrogen deficiency osteoporosis.
ALOX5	15907806	Recently, the 5-LO pathway has also been associated with atherosclerosis and osteoporosis.
P18135	7717367	The fifth patient, 1 month after onset of disabling hip pain, had normal PAI-Fx but high Lp(a) (27 mg/dl), and MRI evidence of bone marrow edema ("transient osteoporosis").
P18135	25075839	A 27-year-old man with severe osteoporosis and multiple bone fractures.
PLIN4	22210160	A Polymorphism in a gene encoding Perilipin 4 is associated with height but not with bone measures in individuals from the Framingham Osteoporosis Study.
PLIN4	22210160	We hypothesized that polymorphisms in PLIN1 and PLIN4 would be associated with bone measures in adult Caucasian participants of the Framingham Osteoporosis Study (FOS).
GPR162	15826746	METHODS: Sixty patients with prostate cancer and osteoporosis were enrolled and randomly assigned to 2 different treatment regimes: group A (30 patients) treated with maximum androgenic blockage (MAB), and group B (30 patients) treated with bicalutamide 150 mg. Each group was divided in 2 subgroups A1-A2 and B1-B2.
GPR162	11994341	Strontium ranelate: dose-dependent effects in established postmenopausal vertebral osteoporosis--a 2-year randomized placebo controlled trial.
GPR162	21808097	Most intriguingly, we found significant age-associated differential expression of HEXA, HEXB, CTSK, SULF1, ADAMTS5, SPP1, COL8A2, GPNMB, TNFAIP6, and RPL29; those genes have been implicated in the bone loss and the pathology of osteoporosis and osteoarthritis in aging.
GPR162	16513359	The biological effects of the analogs were compared with those of 1alpha,25-dihydroxyvitamin D(3) (1a) and 2MD, which is being developed for the treatment of osteoporosis.
GPR162	24256561	This gene, SLC26A7, has similarities and colocalises with SLC4A2, which has previously been associated with osteoporosis and mortality in cattle populations.
GPR162	10728744	A 2-fold increased frequency of osteoporosis was observed in all 4 age groups of RA patients compared with the reference population, ranging from 0% to 28.6% in the femoral neck, 0% to 29.9% in the total hip, and 1.8% to 31.5% in the spine.
GPR162	23638215	Overexpression of integrin a2 promotes osteogenic differentiation of hBMSCs from senile osteoporosis through the ERK pathway.
GPR162	15824851	MATERIALS AND METHODS: Here we analyzed COL1A1, COL1A2, and LRP5 for mutations in 20 pediatric patients with primary osteoporosis characterized by low BMD, recurrent fractures, and absent extraskeletal manifestations.
GPR162	2052622	Mutation in a gene for type I procollagen (COL1A2) in a woman with postmenopausal osteoporosis: evidence for phenotypic and genotypic overlap with mild osteogenesis imperfecta.
GPR162	11940733	A -2.5 criterion (based on young normal males or females) appeared to underestimate the prevalence of osteoporosis, except for QCT, which seemed to overestimate risk.
GPR162	26334497	Relationship Between Osteoporosis and Marginal Bone Loss in Osseointegrated Implants: A 2-Year Retrospective Study.
GPR162	9425508	A 2-year phase II study with 1-year of follow-up of risedronate (NE-58095) in postmenopausal osteoporosis.
GPR162	11360662	By reviewing the recent literature, it was found that the genetic variations of CYP19, CYP1A2, CYP3A4, and 17 beta-HSD are important factors affecting the estradiol serum level, and may be closely related to the development of osteoporosis.
GPR162	22750403	A 2-year, randomized, double-blind, placebo-controlled study in men with osteoporosis demonstrated that treatment with risedronate 35mg once a week significantly decreased bone turnover markers (BTMs) and increased bone mineral density (BMD).
GPR162	18457472	Initial filing of the NDA in June 2006 triggered a milestone payment from Wyeth to Ligand.A 2-year, randomized, phase III trial (study 300) has been conducted to compare bazedoxifene (10, 20 and 40 mg) and raloxifene (60 mg) in 1583 patients for the prevention of osteoporosis.
GPR162	22615153	Their fractures were classified according to the AO/OTA classification (8 patients, 31A2.2; 17 patients, 31A2.3 and 3 patients, 31A3.3) and their osteoporosis was confirmed by bone densitometry.
GPR162	19426706	Genetic variation plays an important role in osteoporosis and a prime candidate gene is Collagen alpha2(I) (COL1A2).
LEP	16309373	Alteration in serum leptin correlates with alterations in serum N-telopeptide of collagen type I and serum osteocalcin during the progression of osteoporosis in ovariectomized rats.
LEP	15164730	Adjustment for adult lifestyle determinants of osteoporosis made little difference to our results, but the associations of leptin with bone mass were no longer significant after adjustment for body mass index.
LEP	23104664	OBJECTIVES: The present study assessed the potential role of leptin administration in the protection and intervention against glucocorticoid-induced secondary osteoporosis in female rats.
LEP	20642443	For example, obese postmenopausal women, with elevated circulating leptin and leptin resistance, appear protected against the development of osteoporosis.
LEP	17103447	Bone and cartilage and their disorders are addressed under the following headings: functions of bone; normal and abnormal bone remodeling; osteopetrosis and osteoporosis; epithelial-mesenchymal interaction, condensation and differentiation; osteoblasts, markers of bone formation, osteoclasts, components of bone, and pathology of bone; chondroblasts, markers of cartilage formation, secondary carti…
LEP	15307204	Is leptin associated with serum lipid profile or any other parameters of blood biochemistry in post-menopausal women with osteoporosis?
LEP	10664526	However, little is known about the relationship between plasma leptin and bone mass in postmenopausal women with osteoporosis.
LEP	24052207	Leptin did not have a significant correlation with BMD in either the osteoporosis or non-osteoporosis groups (P > 0.05).
LEP	12419242	This study demonstrates a leptin-dependent neuronal regulation of bone formation with potential therapeutic implications for osteoporosis.
LEP	19215023	The aim of this study was to compare the osteogenic potential and responsiveness to leptin of mesenchymal stem cells (MSCs) from bone marrow between postmenopausal women with osteoarthritis (OA) and osteoporosis (OP).
LEP	23460508	Association of polymorphisms in the leptin and leptin receptor genes with inflammatory mediators in patients with osteoporosis.
LEP	20150868	Our data indicate that the net effect of circulating leptin may cause bone loss and is significantly related to high-turnover serum bone markers, at least in postmenopausal women with osteoporosis.
LEP	23104664	Potential role of leptin against glucocorticoid-induced secondary osteoporosis in adult female rats.
LEP	21441053	CONCLUSIONS: Low oxytocin serum levels appeared to be associated with severe osteoporosis, independently of other factors associated with osteoporosis or known to regulate oxytocin serum levels, such as estradiol or leptin, reinforcing the concept that oxytocin may be involved in the pathophysiology of postmenopausal osteoporosis.
LEP	12749431	OBJECTIVE: To determine whether leptin is involved in bone remodeling in patients with postmenopausal osteoporosis.
LEP	19657401	The men with osteoporosis had lower parameters of body composition, lower mean serum leptin concentrations, and a greater impairment in measures of lung function compared to the men without osteoporosis.
LEP	26141838	Through inhibition of histone deacetylase 4 (HDAC4) expression, miR-29a restored acetylated Runx2 and β-catenin abundances and reduced RANKL, leptin and glucocorticoid receptor expression in glucocorticoid-mediated osteoporosis bone tissues.
LEP	16353671	There was no correlation between plasma leptin concentrations and BMD values in three groups (r(s) = -0.89 in normal BMD group, r(s) = -0.124 in osteopenia group, and r(s) = -0.195 in osteoporosis group).
LEP	20086494	Although the exact cause of the female athlete triad (amenorrhea, disordered eating, and osteoporosis) is unknown, recent research implicates leptin, a hormone that is secreted by adipocytes.
LEP	24250662	Propranolol Prevents Osteoporosis and up-regulates Leptin in Ovariectomized Rats.
LEP	18926548	Our review of the current literature shows that leptin may have therapeutic potentials in promoting restoration of menstrual cycles in weight restored patients, reducing motor restlessness in severely hyperactive patients, and preventing osteoporosis in chronic patients.
LEP	24052207	Relationships between serum adipocyte hormones (adiponectin, leptin, resistin), bone mineral density and bone metabolic markers in osteoporosis patients.
LEP	23289027	DESIGN: We discuss the role of leptin on bone and molecular genetics of osteoporosis in postmenopausal obese women.
LEP	11851841	The reasons for these findings are uncertain, but a pathophysiological role of circulating leptin in osteoporosis in chronic liver disease is possible.
LEP	11085846	Secondary osteoporosis: the potential relevance of leptin and low body weight.
LEP	23843790	In conclusion, puerarin could prevent hOBs apoptosis via ERK signaling pathway, which might be effective in providing protection against bone loss and bone remolding associated with osteoporosis.
LEP	16309373	The data obtained suggest that the alterations in serum leptin levels during the progression of osteoporosis in ovariectomized rats follow the alterations in bone markers.
LEP	21441053	METHODS: In 20 postmenopausal women with severe osteoporosis compared to 16 healthy controls, we measured serum levels of oxytocin, high sensitive estradiol, testosterone, FSH, LH, SHBG, TSH, osteocalcin, serum type I collagen carboxy-terminal telopeptide, leptin.
LEP	12749431	Relationship between serum leptin concentrations and bone mineral density as well as biochemical markers of bone turnover in women with postmenopausal osteoporosis.
LEP	18052758	UNLABELLED: A comparative study of bone metabolism between postmenopausal women with osteoarthritis and osteoporosis showed that differential levels of bone remodeling markers, leptin, free leptin index, and osteoprotegerin might partly contribute to the proposed inverse relationship in bone mass between postmenopausal women with osteoarthritis and osteoporosis.
LEP	19386365	The potential anti-osteoporotic activity of these compounds was tested on human primary osteoblasts (hOBs) and human primary osteoclasts (hOCs) in comparison with the bioactivity of strontium ranelate, previously registered as drug in the treatment of post-menopausal osteoporosis.
LEP	10503065	The authors cover many topics, including hypothalamic-pituitary-testicular axis and aging, sexuality, muscle strength, Leptin, osteoporosis, etc.
LEP	18782003	The protective effect exerted by locally generated factors, such as estradiol and leptin, on MSCs differentiation was analyzed, because altered bioavailability of these factors may play a part in osteoporosis triggering.
LEP	16353671	Plasma leptin concentrations in postmenopausal women with osteoporosis.
LEP	16353671	Osteoporosis is less common in obese individuals with increased bone mineral density (BMD) and plasma leptin concentrations.
LEP	20150868	Serum leptin is correlated to high turnover in osteoporosis.
LEP	19208597	Followup studies are needed to evaluate whether abnormal leptin levels confer a risk for fractures due to osteoporosis.
LEP	22647282	Furthermore, we demonstrate that serum leptin may be a useful indicator of risk for osteoporosis associated with diet-induced obesity.
LEP	21376149	Compared to patients without osteoporosis, those with the disease had significantly lower serum levels and adipose tissue expressions of leptin, in association with increased serum β-crosslaps (p=0.028, p=0.034, p=0.022, respectively).
LEP	17973271	The aim of the present report was to study the direct effect of leptin on control and osteoporotic MSCs analyzing whether the protective effect of leptin against osteoporosis could be expressed by inhibition of adipocyte differentiation.
LEP	23460508	The G allele in Lys109Arg and Gln223Arg was associated with increased risk of osteoporosis and with differences in serum leptin, soluble leptin receptor, IL-1, IL-6, and TNF levels compared with the wild-type A allele (p < 0.05).
LEP	10664526	BACKGROUND: The obese are usually protected against osteoporosis and have increased bone mineral density and plasma leptin concentrations.
LEP	25777984	Interestingly, leptin, one of the most important cytokines derived from fat tissue, seems to account for the largest part of effects on bone, through direct or indirect involvement in bone remodeling and by playing a significant role in many bone diseases, such as osteoporosis, osteoarthritis, rheumatic arthritis, bone tumors and even fractures.
LEP	23408651	Moreover, in vivo administration of STO-609 results in increased OBs and diminished OCs, conferring significant protection from ovariectomy (OVX)-induced osteoporosis in adult mice.
LEP	16621944	Serum osteocalcin (bone formation marker) was significantly correlated with PTH, but not with leptin, IGF-I or 25-OH vitamin D. Osteocalcin and PTH were positively correlated when samples from all seasons were pooled and when only hibernation samples were considered, raising the possibility that the anabolic actions of PTH help maintain bone formation to prevent disuse osteoporosis.
LEP	21971209	CONCLUSIONS: In postmenopausal women with osteoporosis, raloxifene induces a significant increase in leptin levels without significant changes in adiponectin serum levels.
LEP	23731039	Leptin therapy has a significant effect in treatment of ovariectomy induced osteoporosis in rats (Tab.
LEP	23460508	We hypothesized that leptin and leptin receptor gene might be associated with osteoporosis by activating the inflammatory pathway.
LEP	16093869	In PBC no association was found between leptin, sOB-R and liver function tests, histological stages or the presence of osteoporosis.
LEP	26487675	Hypothalamic leptin gene therapy reduces body weight without accelerating age-related bone loss.
LEP	15526523	Circulating osteoprotegerin and leptin levels in postmenopausal women with and without osteoporosis.
LEP	22613593	In this study, we tried to determine the activation of mitogen-activated protein kinase signal pathways during DHEA treatment and the indirect role of osteoblasts (OBs) on osteoclasts under the DHEA treatment of postmenopausal osteoporosis.
LEP	22322496	CONCLUSION: Although all patients in the present series were on treatment with OBs, a large percentage did not satisfy the criteria for the initiation of treatment for postmenopausal osteoporosis.
LEP	24250662	Our results indicate the effect of propranolol on ovariectomy-induced osteoporosis may be exerted, at least partly, through the regulation of leptin signaling and there may be an interaction between the SNS and leptin on the regulation of bone metabolism.
LEP	24570271	Accordingly, we evaluated the association between the phenotypes of osteoporosis or vertebral fracture and variants of obesity-related genes, peroxisome proliferator-activated receptor-gamma (PPARG), runt-related transcription factor 2 (RUNX2), leptin receptor (LEPR), and adiponectin (ADIPOQ).
LEP	23460508	We found a higher frequency of the A allele for LEP at -2548 in patients with osteoporosis compared with the control group.
LEP	23460508	Therefore, we analyzed polymorphisms of the leptin (gene symbol, LEP) and leptin receptor (gene symbol, LEPR) genes and determined their associations with proinflammatory cytokine levels in patients with osteoporosis.
LEP	21376149	CONCLUSION: Our results suggest that adipose tissue leptin and OPG expressions are related to osteoporosis in patients with COPD, and appear to act as mediators between fat mass and BMD.
LEP	20675058	Moreover, leptin, which was positive correlation with osteoporosis, has been showed to exert angiogenic effects and could regulate VEGF expression, promoting the proliferation of the cancer blood vessel.
LEP	20150868	METHODS: We measured bone mineral density (BMD), serum leptin levels and markers of bone metabolism, including osteocalcin and cross-laps in 44 patients with osteoporosis.
LEP	18852498	METHODS: Relevant sources were identified from the Pubmed and Web of Science (ISI) databases from the first relevant publication in 1994 to the present, 2007, using a combination of key words and terms including depression, major depressive disorder, osteoporosis, bone mineral density, hypothalamic-pituitary-adrenal axis, cortisol, cytokines, leptin, antidepressants, selective serotonin reuptake …
LEP	23601428	The AN group with osteoporosis had lower IGF-1 and estradiol levels (both p<0.001), lower serum leptin (p<0.02), and higher cortisolemia (p<0.03) levels compared with AN group without osteoporosis.
LEP	24672199	Adipocytes secret leptin, adiponectin, adipsin, as well as proinflammatory cytokines, that contributes in pathogenesis of osteoporosis.
LEP	23988172	In this study, we investigated plasma leptin concentrations in postmenopausal women with osteoporosis and also analyzed the relationship between plasma leptin levels and bone mineral density (BMD) in order to understand the potential role of leptin in maintaining bone mass.
LEP	16498051	CONCLUSIONS: These findings suggest that leptin is involved in the regulation of bone metabolism in healthy adults and might play a potential role in the prevention of osteoporosis.
LEP	23988172	Plasma leptin values in postmenopausal women with osteoporosis.
LEP	21376149	Our aim was to investigate expressions of leptin and osteoprotegerin (OPG) in the adipose tissue, and their relationships to osteoporosis in patients with COPD.
LEP	25274281	Results indicate that ibandronate reduces serum leptin levels but how does it help in reducing the osteoporosis.
LEP	9329346	As delayed menarche and leanness are considered risk factors for osteoporosis, we also evaluated the relation between leptin and bone mass.
LEP	24052207	The purpose of this study was to investigate the relationship between fasting serum leptin, adiponectin and resistin levels and bone mineral density (BMD) in osteoporosis patients and a non-osteoporosis control group.
LEP	21430565	Although the experience with the L-EPS is very limited and preliminary, results to date indicate that it is of value in treating patients with osteoporosis and warrants further study.
LEP	23947082	Effect of strontium ranelate on serum leptin and bone turnover markers in women with established postmenopausal osteoporosis.
LEP	11841960	Examples include disorders of metabolism, cortisol and leptin regulation, fluid and electrolyte homeostasis, thyroid function, glucose regulation, growth and development, and reproductive function with the development of amenorrhea as well as the risk of osteoporosis.
LEP	21441053	However, factors involved in the pathophysiology of osteoporosis, such as estrogens and leptin, are known to regulate oxytocin secretion.
LEP	20492842	CONCLUSIONS: In premenopausal women with MDD, reduced daily adiponectin production may increase the risk of diabetes mellitus, and elevated leptin may contribute to osteoporosis.
LEP	20150868	This study was conducted to investigate a possible relationship of leptin and bone turn-over in postmenopausal women with osteoporosis.
LEP	10664526	OBJECTIVE: To investigate plasma leptin concentrations in postmenopausal women with osteoporosis to improve the understanding of the role of leptin in determining bone mass.
LEP	23706140	Leptin may be a potential option in preventing osteoporosis for menopausal women.
LEP	14582047	BACKGROUND: The hormone leptin is considered to have a role in the prevention of osteoporosis and probably acts on bone tissue through inhibition of osteoclasia.
LEP	21376149	Relationship between osteoporosis and adipose tissue leptin and osteoprotegerin in patients with chronic obstructive pulmonary disease.
LEP	23460508	Polymorphisms in LEP and LEPR are associated with increased risk of osteoporosis, possibly by increasing the expression of proinflammatory cytokines.
LEP	11781027	The purpose of our study was to compare early adhesion-mediated events using previously described and characterized clinically derived OBs obtained from human patients undergoing major joint arthroplasty for osteoporosis or osteoarthritis.
LEP	20052458	Anorexia nervosa, osteoporosis and circulating leptin: the missing link.
LEP	23289027	Bone mass regulation of leptin and postmenopausal osteoporosis with obesity.
LEP	25274281	Further studies are needed to explain how the decrease in serum leptin level may help in reducing the progression of osteoporosis.
LEP	26636521	CONCLUSIONS: The obese children had increased levels of leptin and PTH with strong associated with bone turn over markers OCN, β-CTx and deficiency of 25(OH)D which may be playing an important role in the pathogenesis of obesity and related bone metabolic risk diseases as osteoporosis and fractures.
LEP	19653807	Since the content of cytokines such as adiponectin, leptin, osteoprogeterin (OPG), soluble receptor activator of nuclear factor kappaB ligand (s-RANKL), tumor necrosis factor alpha, and interleukin 6 (IL-6) may elicit conditions promoting or sustaining osteoporosis, in this work we compared the concentrations of the above-mentioned cytokines and also the level of the soluble receptors for both IL…
LEP	23746275	In this review, we report the most recent research advances about the role of leptin in bone and cartilage function and its implication in inflammatory and degenerative joint diseases, such as osteoarthritis, rheumatoid arthritis and osteoporosis.
LEP	18932203	Therefore, we treated control and T1-diabetic mice with chronic (28 days) subcutaneous infusion of leptin or saline to elucidate the therapeutic potential of leptin for diabetic osteoporosis.
LEP	10664526	Plasma leptin concentrations in postmenopausal women with osteoporosis.
LEP	17446236	Dehydroepiandrosterone (DHEA) may be a promising agent for postmenopausal osteoporosis (PMO), but its mechanism to modulate osteoblasts (OBs) is yet to be explained.
LEP	16309373	The role of leptin during the progression of osteoporosis was investigated in ovariectomized rats by correlation of serum leptin levels with N-telopeptide of collagen type I (NTx) and osteocalcin levels before ovariectomy and 20, 40 and 60 days after the operation.
LEP	25497348	Under normal conditions, the skeleton is constantly remodeled by bone-forming osteoblasts (OBs) and bone-resorbing osteoclasts (OCLs), and imbalances in this process may lead to osteoporosis.
LEP	19215023	Osteogenic potential and responsiveness to leptin of mesenchymal stem cells between postmenopausal women with osteoarthritis and osteoporosis.
LEP	22534195	Ultimately, determining the actions of leptin on the skeleton will be critical for understanding how the obesity epidemic may be impacting the prevalence of osteoporosis.
LEP	15993236	Further studies are warranted to establish the safety and effectiveness of leptin for the infertility and osteoporosis associated with hypothalamic amenorrhoea, and to clarify its role in anorexia nervosa.
GJA1	23606335	The G60S connexin 43 mutation activates the osteoblast lineage and results in a resorption-stimulating bone matrix and abrogation of old-age-related bone loss.
GJA1	23606335	Our study is the first to describe a Cx43 mutation in which osteopenia is caused by increased rather than decreased osteoblast function and where activation of osteoclasts occurs not only through increased mbRANKL but an increase in a matrix protein that affects bone resorption, which together abrogate age-related bone loss in older animals.
LAX1	11424136	Gerodermia osteodysplastica (GO) is a connective tissue disorder characterized by premature aging, wrinkled, and lax skin with reduced elasticity which is more marked on the dorsum of the hands and feet associated with hyperextensible joints and osteoporosis.
LAX1	17014644	They showed the characteristic features associated with this syndrome: a prematurely aged face with wrinkly, lax skin, more prominent on the acral regions, associated with joint laxity, osteoporosis, and skeletal abnormalities.
LAX1	3941923	We report our detailed investigation of a 7-1/2-year-old girl with short stature, aged appearance, decreased subcutaneous fat and muscle mass, dry coarse hair, foot deformities, macroepiphyses with prominent but lax joints, and osteoporosis with recurrent fractures who is the off-spring of first cousins.
LAX1	3236370	The important signs of this syndrome include a droopy, jowly face with a degree of malar hypoplasia and mandibular prognathism, lax, but non-hyperelastic skin, most marked over the extremities, and osteoporosis which may be associated with fractures and vertebral collapse.
OXT	18583541	Oxytocin controls differentiation of human mesenchymal stem cells and reverses osteoporosis.
OXT	25690480	Longitudinal assessment of oxytocin efficacy on bone and bone marrow fat masses in a rabbit osteoporosis model through 3.0-T magnetic resonance spectroscopy and micro-CT. UNLABELLED: This study aims to longitudinally assess the effect of oxytocin on bone and bone fat masses using micro-CT, in vivo magnetic resonance spectroscopy (MRS), and histopathological adipocyte quantification.
OXT	21441053	PURPOSE: There is growing evidence that oxytocin, which regulates appetite, plays a role in bone remodelling and improves osteoporosis.
OXT	23258269	Oxytocin knockout mice have severe osteoporosis, and administration of oxytocin improves bone microarchitecture in these mice.
OXT	25690480	Early in vivo oxytocin (OT) treatment to the osteoporosis (OP) rabbit model may reliably inhibit bone degeneration and reduce bone marrow fat accumulation by decreasing marrow adipocyte size and density.
OXT	21441053	In a logistic regression analysis, osteoporosis remained significantly correlated to oxytocin, regardless of age.
OXT	20626426	However, this small nine amino acid peptide is involved in a wide variety of physiological and pathological functions such as sexual activity, penile erection, ejaculation, pregnancy, uterus contraction, milk ejection, maternal behavior, osteoporosis, diabetes, cancer, social bonding, and stress, which makes oxytocin and its receptor potential candidates as targets for drug therapy.
OXT	21441053	However, factors involved in the pathophysiology of osteoporosis, such as estrogens and leptin, are known to regulate oxytocin secretion.
OXT	21441053	METHODS: In 20 postmenopausal women with severe osteoporosis compared to 16 healthy controls, we measured serum levels of oxytocin, high sensitive estradiol, testosterone, FSH, LH, SHBG, TSH, osteocalcin, serum type I collagen carboxy-terminal telopeptide, leptin.
OXT	26322016	Two Birds with One Stone: Possible Dual-Role of Oxytocin in the Treatment of Diabetes and Osteoporosis.
OXT	21441053	CONCLUSIONS: Low oxytocin serum levels appeared to be associated with severe osteoporosis, independently of other factors associated with osteoporosis or known to regulate oxytocin serum levels, such as estradiol or leptin, reinforcing the concept that oxytocin may be involved in the pathophysiology of postmenopausal osteoporosis.
OXT	26042090	As we previously demonstrated in a mouse model for menopause in women that treatment with the neurohypophyseal peptide hormone oxytocin (OT) normalizes body weight and prevents the development of osteoporosis, herein we addressed the effects of OT in male osteoporosis.
OXT	26042090	Oxytocin reverses osteoporosis in a sex-dependent manner.
OXT	25962010	Oxytocin levels are altered in several diseases and the use of oxytocin or its antagonists have been identified as a possible clinical intervention in the treatment of mood disorders and pain conditions, some cancers, benign prostatic disease and osteoporosis.
OXT	15780511	Oxytocin and osteoporosis: is there any relationship?
OXT	24967304	Disorders in OXT secretion and functions can cause a series of aberrant social behaviors, such as depression, autism, and schizophrenia as well as disturbance of nonsocial behaviors/functions, such as anorexia, obesity, lactation failure, osteoporosis, diabetes, and carcinogenesis.
SHC1	9167417	SHC appears to have a significant analgesic effect in treatment of primary osteoporosis.
GPNMB	21808097	Most intriguingly, we found significant age-associated differential expression of HEXA, HEXB, CTSK, SULF1, ADAMTS5, SPP1, COL8A2, GPNMB, TNFAIP6, and RPL29; those genes have been implicated in the bone loss and the pathology of osteoporosis and osteoarthritis in aging.
GK2	6249182	Two brothers with a recently described inborn error of metabolism characterized by glyceroluria, hyperglycerolemia, and generalized glycerol kinase deficiency had moderate psychomotor retardation, spasticity, growth failure, a nonspecific myopathy, osteoporosis, and adrenal insufficiency.
OR10X1	25024699	Multivariate analysis showed that age (OR 1.13; 95%CI 1.07-1.20), being female (OR 4.77; 95%CI 1.78-12.77), BMI (OR 0.79; 95%CI 0.68-0.92), H. pylori (OR 5.33; 95%CI 1.73-16.42), and PUD (OR 4.98; 95%CI 1.51-16.45) were related to osteoporosis.
OR10X1	25722061	In the multivariate logistic regression analysis, BMI over 32 and fertility duration over 33 years had a statistically significant protective effect against osteoporosis (OR 0.42, CI 95 % 0.27-0.66; OR 0.36, CI 95 % 0.24-0.56, respectively), but age was positively correlated with osteoporosis (OR 1.13, CI 95 % 1.01-1.17) CONCLUSIONS: Duration of fertility (years of menstruation) longer than 33 ye…
OR10X1	26224829	A combination of more than three fractures and compression in the worst quartile had a mean OR of 114.2 (95% CI 6.7 to 1938.3) of having osteoporosis compared with those without a fracture.
P01622	18414001	Fifty healthy subjects and 50 subjects with osteoporosis were screened for genetic polymorphism in the coding region of SLC22A11 (hOAT4) using GC-clamp PCR and denaturing gradient gel electrophoresis (DGGE).
P01622	18414001	Identification and characterization of single nucleotide polymorphisms of SLC22A11 (hOAT4) in Korean women osteoporosis patients.
TAOK3	23424060	Furthermore, the KDS quintile group of women was inversely associated with hypertension, osteoporosis and diabetes.
HSD11B2	24974351	This new compound 21 could be used for an in vivo proof of principle to demonstrate the true therapeutic efficacy of 17β-HSD2 inhibitors in osteoporosis.
HSD11B2	21945251	As 17β-hydroxysteroid dehydrogenase type 2 (17β-HSD2) catalyses the conversion between active 17β-hydroxysteroid estradiol (E2) and testosterone (T) into their less active 17-ketosteroid and has been found in bones, 17β-HSD2 inhibitor may provide a new approach in the onset of osteoporosis.
HSD11B2	21222430	The excellent bone seeking properties of DO3P-AME-DO3P make it a candidate of choice for SPECT imaging and preferential uptake of the compound in osteoclasts in comparison to osteoblasts; BMM and BMC can be used to understand the pathway of pathogenesis of osteoporosis and skeletal metastases.
HSD11B2	26230928	Design and synthesis of a new class of inhibitors for the treatment of osteoporosis and its comparative h17β-HSD2 and m17β-HSD2 SAR study are described.
HSD11B2	21211981	17β-HSD2 inhibitors for the treatment of osteoporosis: Identification of a promising scaffold.
HSD11B2	21945251	Discovery of a new class of bicyclic substituted hydroxyphenylmethanones as 17β-hydroxysteroid dehydrogenase type 2 (17β-HSD2) inhibitors for the treatment of osteoporosis.
HSD11B2	24974351	As 17β-HSD2 is present in bones and as estradiol and testosterone are able to induce bone formation and repress bone resorption, inhibition of this enzyme could be a new promising approach for the treatment of osteoporosis.
HSD11B2	25259513	17β-HSD2 is a promising new target for the treatment of osteoporosis.
HSD11B2	16079253	'Cushing's disease of the kidney' arises because of a failure of 11beta-HSD2 to inactivate cortisol to cortisone resulting in cortisol-induced mineralocorticoid excess.Conversely, 11beta-HSD1 has been linked to human obesity and insulin resistance, but also to other diseases in which glucocorticoids have historically been implicated (osteoporosis, glaucoma).
HSD11B2	23145773	Inhibition of 17β-HSD2 is an attractive mechanism for the treatment of osteoporosis.
HSD11B2	21972996	As 17β-hydroxysteroid dehydrogenase type 2 (17β-HSD2) oxidizes E2 to its inactive form estrone (E1) and has been found in osteoblastic cells, it is an attractive target for the treatment of osteoporosis.
HSD11B2	22532378	A series of disubstituted-1H-1,2,4-triazole derivatives was synthesized with the aim of developing new non-steroidal inhibitors of 17β-hydroxysteroid dehydrogenase type 2 (17βHSD2) - a novel and attractive target for the treatment of osteoporosis.
HSD11B2	21211981	Since 17β-HSD2 is present in osteoblasts, inhibition of this enzyme may provide a new and promising approach to prevent the onset of osteoporosis, keeping a certain level in estrogens and androgens in bone cells of ageing people.
BRCA1	26086567	Osteoporosis risk and management in BRCA1 and BRCA2 carriers who undergo risk-reducing salpingo-oophorectomy.
BRCA1	16121806	The 20 genes with at least a 3-fold change, annotated with known phenotypic associations in the current gene databank (phenotype association, fold change) were aspartoacylase (Canavan disease, 9.96), growth hormone receptor (Laron dwarfism, idiopathic short stature, 8.25), lipoprotein lipase (familial chylomicronemia syndrome, lipoprotein lipase deficiency, 8.00), vitamin D (1,25- dihydroxyvitami…
LPAR4	22867754	The opposite effects of LPA(1) and LPA(4) during osteoblastic differentiation support the possibility that new pharmacological agents derived from the LPA pathways could be found and used in clinical practice to positively influence bone formation and treat osteoporosis.
USE1	23875063	In the present study, four microsatellite markers viz., D12S1633, D12S1635, D12S347, and D12S96, that lie in the vicinity of the VDR gene on chromosome 12 were selected to assess the allele distribution pattern and diversity among three groups of individuals - normal, osteopenia and osteoporosis.
USE1	8837546	RECOMMENDATIONS: The use of 1 alpha-OH-D3 for the treatment of osteoporosis in Canada cannot be supported without larger and longer randomized, controlled clinical trials.
USE1	23875063	Statistically significant linkage disequilibrium was detected for the allele - 22 of locus D12S96 with osteoporosis.
USE1	7984788	This would be a physiologic and not a pharmacologic use of vitamin D. The use of 1,25(OH)2D for treatment of osteoporosis in individuals with adequate nutrition and sunlight exposure may require somewhat higher than physiologic doses to be effective.
USE1	1933597	Studies of the use of 1,25-(OH)2D3 to prevent or treat osteoporosis have given conflicting results concerning bone remodeling.
USE1	9506728	The goal of this investigation was to determine whether responsivity of the parathyroid gland was normal after use of (1-34)PTH daily as an investigational therapy for osteoporosis.
USE1	19196903	Other risk factors include osteoporosis (1.19 [1.03-1.36]), falls (1.31 [1.15-1.49]), unsteady gait (1.18 [1.03-1.36]), use of ambulation aide (1.39 [1.21-1.59]), tobacco use (1.42, [1.13-1.80]), severe malnutrition (2.61 [1.67-4.08]), and cognitive impairment (1.30 [1.12-1.51]).
USE1	3812514	Data on the use of 25-OH D show no greater benefit than for vitamin D. The use of 1,25-dihydroxyvitamin D (1,25-OH2 D) plus calcium may be superior to the use of calcium alone in some forms of osteoporosis.
S1PR2	21135136	Inhibition of S1PR2 function by the antagonist JTE013 changed the migratory behavior of monocytoid cells, including OPs, and relieved osteoporosis in a mouse model by limiting OP localization and reducing the number of mature OCs attached to the bone surface.
CRYGC	26103626	However, CXCL8 and CCL20 enhanced osteoblast-mediated osteoclastogenesis, partly via IL-6 production, suggesting that CXCL8 and CCL20 may contribute to osteoporosis in rheumatoid arthritis by affecting bone cell communication.
RUNX3	25605327	Human RUNX3 resides on chromosome 1p36, a region that is associated with osteoporosis.
TGM2	20173778	INVESTIGATIONS: Analysis of tissue transglutaminase IgA, endoscopic biopsy, serial BMD scans, FRAX calculation of osteoporotic fracture risk, Gail model calculation of breast cancer risk, assessment of blood vitamin D concentration and secondary evaluation for osteoporosis.
TGM2	19255929	Coeliac disease-specific tissue transglutaminase autoantibodies are associated with osteoporosis and related fractures in middle-aged women.
TGM2	25926939	PATIENTS AND METHODS: We evaluated a total of 560 individuals, 460 with osteoporosis and 100 healthy subjects, from the rheumatology clinic in Imam Khomeini and Shariati hospital by IgA anti-tissue transglutaminase (anti-tTG) for celiac disease.
TGM2	19255929	OBJECTIVE: To investigate whether the serological marker for coeliac disease, tissue transglutaminase autoantibody (tTGAb), is associated with decreased bone mass density (BMD) and increased frequency of fractures in middle-aged women screened for osteoporosis.
TGM2	24863089	SUBJECTS AND METHODS: One hundred patients with osteoporosis and 97 controls were evaluated for IgA-EmA (IgA anti-endomysial antibodies) by indirect immunofluorescence method and IgG-anti-tTG (tissue transglutaminase) by ELISA assay.
MECP2	18059018	Moreover, the frequent occurrence of osteoporosis and scoliosis in RTT patients suggests impaired bone formation and/or remodeling.
HNMT	26604945	Advances in the understanding of the pathogenic mechanisms allowed a better understanding of the relationship with other diseases like osteoporosis and also to hypothesize new therapies based on modulation of host response (host modulatory therapy - HMT).
MARCH10	21204588	METHODS: This retrospective analysis of administrative claims data examined women with osteoporosis initiating therapy with alendronate, risedronate, ibandronate, or raloxifene from July 1, 2002, to March 10, 2006.
PDLIM7	4010606	Enigma of bone loss and osteoporosis.
PDLIM7	3469111	The enigma of osteoporosis.
SLC23A2	23999113	This study has provided evidence that the regulation of the SVCT2 transporter plays an important role not only in T1D osteoporosis but also in other oxidative stress-related musculoskeletal complications.
NOS1	25871004	The AA genotype of NOS1 rs1279104 polymorphism was found to have a 3.68-fold higher prevalence of osteoporosis at the femoral neck compared with the GG genotype (95% CI, 1.29-10.50; P = 0.02).
NOS1	25871004	CONCLUSIONS: Results suggest that CART rs2239670 polymorphism may be one of the genetic factors affecting lumbar spine BMD in Korean postmenopausal women and that NPY rs17149106, NPY rs16123, NOS1 rs1279104, and combined (rs2880415 and rs6857715) polymorphisms in the NPY2R gene may be useful in identifying women at risk for osteoporosis.
CSN3	7990272	In this study, to determine if KCA-098 is therapeutically applicable for the treatment of osteoporosis, we compared the effect of KCA-098 on bone tissues with that of ipriflavone, a drug that is clinically used for the treatment of osteoporosis.
CSN3	7990272	Therefore, KCA-098 seems to be more potent than ipriflavone in stimulating bone tissue formation and may thus be expected to become a useful agent for the treatment of osteoporosis.
CLDN11	19857677	The prevalence of OSP increased during the first year, thereafter decreasing to the initial value, but the rate of osteoporosis did not change significantly (8.3% vs 6.0%).
CLDN11	19857677	At the initial measurement, we observed osteopenia (OSP) among 35% in the LS and 52% in the femur: there was osteoporosis in 8.3%.
CLDN11	25619900	Increased activity of OCs not only contributes to pathological bone resorption, such as osteoporosis and periodontitis, but also is responsible for physiological conditions like orthodontic tooth movement (OTM).
CLDN11	20362669	The present study addresses the role of phytoestrogens (PE) and Ca supplementation in low Ca and low VD diet induced osteoporosis (OSP).
CLDN11	24299440	OBJECTIVES: To improve osteoporosis (OSP) management following minimal trauma fracture (MTF) with few additional resources.
CLDN11	25140207	CONCLUSION: Long term PPI therapy at high doses could lead to osteoporosis and enhanced OTM.
PRL	15625215	OBJECTIVE: Osteoporosis is regularly mentioned as a possible consequence of treatment with prolactin-increasing antipsychotic medications, but little is known about the prevalence and the degree of loss of bone mineral density in patients suffering from schizophrenia.
PRL	12504072	Elevated prolactin levels may play important roles, both direct and indirect, in various pathologic states, including breast cancer, osteoporosis, cardiovascular disorders, and sexual disturbances.
PRL	2881495	Neuroleptics, prolactin, and osteoporosis.
PRL	9550540	Therefore, the present data indicate that the osteoporosis of hyperprolactinemia is likely due to PRL-induced hypogonadism, rather than a direct effect of PRL on calcium homeostatis.
PRL	18525357	(3) Other therapies that increase the incidence and/or prevalence of medication-induced osteoporosis and fracture include androgen-deprivation therapy, aromatase inhibitors, protease inhibitors, selective serotonin reuptake inhibitors and prolactin-raising antiepileptic agents.
PRL	15876906	Levels of prolactin, markers of bone metabolism, and risk factors for osteoporosis were measured.
PRL	15172944	BACKGROUND: High rates of osteoporosis in schizophrenia may result from the prolactin-raising effects of some antipsychotic medication.
PRL	18004132	Some individuals presenting with hyperprolactinemia remain asymptomatic, but others may exhibit a wide range of clinical symptoms resulting from either the direct effects of prolactin on body tissues (galactorrhea, gynecomastia) or endocrine-related secondary effects (sexual and reproductive dysfunction in the short term, and possibly the risk of tumorigenesis and osteoporosis in the longer term).
PRL	3724459	There is evidence that prolactin (PRL) excess plays a role in the etiology of osteoporosis associated with human prolactinoma.
PRL	23983962	This may have important implications for prolactin monitoring or the periodic assessment of osteoporosis-related outcomes in patients requiring extended treatment.
PRL	23983962	OBJECTIVE: Prolactin elevation has been proposed as a risk factor for low bone density and potentially osteoporosis in patients on long-term treatment with prolactin-elevating antipsychotics.
PRL	15643097	These findings suggest that the high rates of osteoporosis associated with schizophrenia may result from hypogonadism secondary to antipsychotic-induced hyperprolactinemia, and that the prolactin-raising profile of antipsychotic drugs should be considered when choosing an antipsychotic drug.
PRL	25937241	Drug-induced changes in serum prolactin (sPrl) levels constitute a relevant issue due to the potentially severe consequences on physical health of psychiatric patients such as sexual dysfunctions, osteoporosis and Prl-sensitive tumors.
PRL	26632691	Numerous reports have discussed bone mineral density (BMD) or the risk of osteoporosis in schizophrenia, but have yielded only controversial results.We conducted an update of meta-analysis to examine the overall change in BMD in patients with schizophrenia and the effect on BMD of different antipsychotic drugs.Electronic research through platform of PubMed.The inclusion criteria were as follows: …
PRL	18574709	At the time of the fracture a severe osteoporosis and a strongly enhanced plasma prolactin level (117 ng/ml; normal values: 3-24 ng/ml) were detected.
PRL	12370106	OBJECTIVE: To evaluate the effects of a 6 month administration of raloxifene hydrochloride, a selective estrogen receptor modulator which was recently approved for the prevention of osteoporosis, on serum gonadotropin and prolactin (PRL) levels and on TRH-stimulated PRL responsiveness in postmenopausal women who have not undergone estrogen replacement therapy.
PRL	15876906	Raised prolactin levels have been linked with osteoporosis.
PRL	11913677	Long-term problems related to prolactin elevation include decreased bone density and osteoporosis, relapse of psychosis because of poor compliance due to sexual dysfunction or depression, and perhaps cancer, although more research in this area is needed.
PRL	15643097	Schizophrenic illness is associated with high rates of osteoporosis, the etiology of which remains obscure, but which may be at least partly explained by the prolactin-raising properties of antipsychotic medication.
PRL	7455627	Osteoporosis and prolactin.
PRL	24738111	CONCLUSION: The increase of PRL might be an important risk factor leading to a high prevalence of osteoporosis in patients with schizophrenia on long-term conventional antipsychotic medication.
RPL29	21808097	Most intriguingly, we found significant age-associated differential expression of HEXA, HEXB, CTSK, SULF1, ADAMTS5, SPP1, COL8A2, GPNMB, TNFAIP6, and RPL29; those genes have been implicated in the bone loss and the pathology of osteoporosis and osteoarthritis in aging.
NR1H3	22806960	These results reveal an unexpected involvement of LXRs in the regulation of bone turnover and highlight a potential role for LXRs as novel targets in the treatment of osteoporosis and related diseases.
NR1H3	22806960	During an ovariectomy (OVX)-induced model of postmenopausal osteoporosis, the application of an LXR agonist shifted the RANKL/OPG ratio in vivo, ameliorated the enhanced osteoclast differentiation, and provided complete protection from OVX-induced bone loss.
MT-ATP6	21040703	We report here that although ATP6v0d2-deficient (ATP6v0d2 KO) mice exhibit an osteopetrotic phenotype due to inefficient osteoclast maturation, this deficiency fails to protect mice from ovariectomy (OVX)-induced bone loss, a model for post-menopause-associated osteoporosis.
MT-ATP6	26312577	Bivariate Genome-Wide Association Study Implicates ATP6V1G1 as a Novel Pleiotropic Locus Underlying Osteoporosis and Age at Menarche.
VKORC1	21179439	This is the first report of VKORC1 common genetic variation associated with BMD, and one of the few reports available that investigate the genetics of BMD and osteoporosis in diverse populations.
VKORC1	23703341	INTERPRETATION & CONCLUSIONS: VKORC1 1173C>T polymorphism (TT genotype) was associated with osteoporosis and calcified plaques in the carotid artery in patients referred for BMD measurement.
VKORC1	20621035	Vitamin K epoxide reductase (VKORC1) gene mutations in osteoporosis: A pilot study.
VKORC1	21179439	Because the candidate gene vitamin K epoxide reductase complex subunit 1 (VKORC1) generates vitamin K quinone, a cofactor for the gamma-carboxylation of bone-related proteins such as osteocalcin, we hypothesized that VKORC1 genetic variants may be associated with BMD and osteoporosis in the general population.
VKORC1	21179439	We then tested for associations between VKORC1 SNPs and osteoporosis, but the results did not mirror the associations observed between VKORC1 and BMD, possibly due to small numbers of cases.
VKORC1	23703341	The main objective of the study was to investigate the relationship between VKORC1 1173C>T polymorphism, bone mineral density (BMD), and atherosclerosis (evaluated by intima-media thickness of the carotid artery and the presence of calcified plaques) in patients suspected to have osteoporosis or osteopenia and referred for BMD determination.
VKORC1	23703341	RESULTS: In the patients with osteoporosis and osteopenia there was a higher frequency of TT genotype of VKORC1 1173C>T (P=0.04).
VKORC1	20621035	This finding suggests that VKORC1 may play a role in osteoporosis.
ODF1	12434161	Transgenic mice overexpressing soluble osteoclast differentiation factor (sODF) exhibit severe osteoporosis.
ODF1	12434161	These results indicate that excessive production of sODF causes osteoporosis by accelerated osteoclastogenesis.
ODF1	12434161	The transgenic mouse overexpressing sODF in the liver could serve as a useful animal model for studying bone remodeling and evaluating therapeutic agents for osteoporosis.
TCHH	24682357	Vitamin D receptor variability and physical activity are jointly associated with low handgrip strength and osteoporosis in community-dwelling elderly people in Taiwan: the Taichung Community Health Study for Elders (TCHS-E).
TEK	25773760	Targeting of Gi protein coupled receptors in Tie2(+) cells may be a novel therapeutic strategy in states of abnormal bone formation such as osteoporosis and HO.
SQSTM1	26577411	Osteoblast dysfunction, induced by oxidative stress, plays a critical role in the pathophysiology of osteoporosis.
SQSTM1	21820046	Additionally, androgen-deprivation-induced oxidative stress seems to be involved in the pathogenesis of several disorders caused by androgen-deprivation therapy (ADT), including osteoporosis, neurodegenerative disease, and cardiovascular disease.
SQSTM1	12957715	Different chemico-physical techniques were used to investigate structural damage induced by oxidative stress conditions in salmon calcitonin (sCT), a peptide hormone used in treating osteoporosis.
CD160	24113716	Fluorinated 1-arylethanols are important building blocks in medicinal chemistry especially for preparing kinase inhibitors for cancer therapy, NK1 receptor antagonists and drugs used in treatment of osteoporosis.
CD160	23549442	NK1-R antagonist is not recommended for the treatment of estrogen deficiency osteoporosis.
FEV	20429721	Logistic regression showed that a BMI < 25.1 kg/m(2) was independently associated with osteoporosis risk (OR = 10.0; 95%CI 1.3-76); no independent effect emerged for FEV1% (<and 50%).
FEV	23645508	In multivariate analysis, the presence of MetS was independently associated with greater FEV1, inhaled steroids use, osteoporosis, diabetes, and heart failure.
FEV	26251589	BMI and FEV1 were the independent risk factors for osteoporosis in COPD.
FEV	9797911	We studied expiratory relaxed vital capacity (VC) and forced expiratory volume in 1 s (FEV1) in 34 patients with spinal osteoporotic fractures and 51 patients with chronic low back pain (CLBP) due to reasons other than osteoporosis.
FEV	21147624	Osteoporosis risk factors were analyzed with the consideration to principal diagnosis, lung function tests (FVC, FEV1) and mobility (6 MWT; six minute walking test).
FEV	2071263	The study, which was of a double-blind, crossover type vs placebo in 12 subjects suffering from postmenopausal osteoporosis and chronic asthma, evaluates the effects of acute, prolonged administration of salmon calcitonin (sCT) nasal spray on respiratory function (FEV1, MMEF, V25).
FEV	21645119	Patients with osteoporosis at femoral neck site had lower forced expiratory volume in 1 s (FEV(1) ) (p = 0.024), FEV(1) /forced vital capacity (FVC) (p < 0.0001), PEF (p = 0.008), and FEF 25-75 (p = 0.013) values compared with the patients with normal BMD z-scores.
FEV	23819728	For the 1,048 participants with airway obstruction, both respiratory factors (FEV1 and dyspnea) and non-respiratory factors (heart disease, coronary artery disease, diabetes, depression, osteoporosis, cognitive function, and weakness) were associated with decreased disability-free years.
FEV	22459775	This finding adds to recent observations of associations between emphysema and comorbidities of COPD, including osteoporosis and lung cancer, which are independent of the traditional measure of reduced FEV₁.
FEV	25613107	Independent risk factors (adjusted odds ratio [95% CI]) for ≥2 exacerbations were: most severely impaired modified Medical Research Council (mMRC) dyspnoea score (mMRC grade 4: 4.37 [2.64-7.23]), lower FEV1 percent predicted (FEV1 <30%: 2.42 [1.61-3.65]), co-morbid cardiovascular disease (1.42 [1.19-1.68]), depression (1.56 [1.22-1.99]) or osteoporosis (1.54 [1.19-2.01]), and female gender (1.20 …
FEV	15947308	RESULTS: After surgery, we observed significant improvements in respiratory function (FEV1, + 18.8% [p < 0.01]; residual volume [RV], -29.6% [p < 0.001]; diffusing capacity of the lung for carbon monoxide [Dlco], + 21.6% [p < 0.01]) nutritional parameters (fat-free mass, + 6.0% [p < 0.01]), levels of bone-related hormones (free-testosterone, + 20.5% [p < 0.01]; parathormone, -11.2% [p < 0.01]), b…
FEV	21147624	RESULTS: In osteoporosis group (50% of study population) the most affected was LS (mean T-score -3 ±1), with higher steroid consumption (cumulative steroid dose 40 ±28), lower FVC, FEV1 and mobility (6 MWT: 285 m) than in patients without osteoporosis.
FEV	26251589	In a multivariate logistic regression model including age, smoking amount (pack-year), body mass index (BMI), and FEV1, only BMI (odds ratio 0.824, 95% confidence interval 0.73-0.93; P=0.002) and FEV1 (odds ratio 0.360, 95% confidence interval 0.13-0.98; P=0.046) were negatively associated with an increased risk of osteoporosis in COPD patients.
FEV	25613107	Older patients (≥75 years), those with most severe lung impairment (FEV1 <30%), those with highest mMRC score and those with co-morbid osteoporosis were identified as most at risk of experiencing exacerbations requiring hospitalisation.
FEV	26379431	RESULTS: Sex, body mass index, steroid use, percentage of forced expiratory volume in 1 second (FEV1), alkaline phosphatase, and 25-hydroxyvitamin D significantly influenced the risk of osteoporosis.
FEV	9797911	FEV1 was significantly (p < 0.05) lower in patients with osteoporosis when previous body height was considered, in comparison with patients with CLBP (mean +/- SD: 85.0% +/- 14.2% in patients with osteoporosis v 92.4% +/- 13.6% in patients with CLBP).
FEV	23819728	Among participants with airflow obstruction, we examined the association of respiratory factors (FEV1 and dyspnea) and non-respiratory factors (ischemic heart disease, congestive heart failure, diabetes, muscle weakness, osteoporosis, depression and cognitive impairment) on disability-free years.
PHF20	9101370	Because the physical strength of long bones is affected by cortical bone mass and geometry, the effect of TZP-4238 on cortical bone may have a potential for the treatment of osteoporosis with reduced cortical bone formation.
CLTA	23560764	Lithocholic acid (LCA) and bilirubin may play a role in osteoporosis given that both substances have detrimental effects on survival of human osteoblasts, the cells involved in bone formation.
NFATC1	23178987	In addition, modulation of ATF4 and NFATc1 expressions through eIF2α phosphorylation could be a valuable target for the treatment of osteoporosis.
NFATC1	17389747	Therefore, our data might be useful for proper manipulation of NFATc1- and ERalpha-mediated cellular reactions in different bone disorders, such as osteoporosis.
NFATC1	22386813	Taken together, our data suggest that ginsenoside Rb1 is one of the effective components of GSS for the anti-osteoporosis activity and can inhibit osteoclastogenesis by suppressing RANKL-induced activation of both JNK and p38 MAPKs and NF-κB pathways, and consequently down-regulating the gene expression of c-Fos and NFATc1 in osteoclast precursors.
NFATC1	26593901	In conclusion, our results suggest that AP inhibits estrogen deficiency-induced bone loss in mice via the suppression of RANKL-induced osteoclastogensis and NF-κB and NFATc1 activities and, thus, might have therapeutic potential for osteoporosis.
NFATC1	16831953	NFATc1: a novel anabolic therapeutic target for osteoporosis.
NFATC1	18846253	Taken together, our study demonstrates that NFATc1 is required for remodeling of the growing and adult skeleton and suggests that NFATc1 may be an effective therapeutic target for osteoporosis associated with inflammatory states.
NFATC1	24333364	Additionally, we found that the mechanism by which RAM elicited anti-osteoporotic effects was by down-regulating the expression of TRAF6 and NFATc1 in RANKL-RANK pathway, a route of osteoclast differentiation, followed by reducing the production of osteoclast differentiation factors, calcitonin receptors and cathepsin K. CONCLUSIONS: Our research strongly suggests that RAM can be clinically used …
NFATC1	17392048	Therefore, NFATc1 negatively regulates osteoblast differentiation, and its specific inhibition may represent a viable anabolic therapy for osteoporosis.
SP6	17265554	Our results suggested that propranolol, Fcs and needling on Sanyinjiao (SP-6) and Neiguan (PC-6) may improve the bone mass of OVX rats, and it provides an alternative and potential therapy for the prevention of postmenopausal osteoporosis.
RAC2	20683708	SUMMARY: The roles of Rac1 and Rac2 in regulating osteoclast-mediated bone quality in postmenopausal osteoporosis were evaluated using an ovariectomized murine model.
RAC2	20683708	INTRODUCTION: To determine the roles of the Rho family small GTPases Rac1 and Rac2 in regulating osteoclast-mediated bone quality in a model of postmenopausal osteoporosis.
COL1A1	23985982	The aim of this study was to analyze the association between the polymorphisms of the vitamin D receptor (VDR), type I collagen (COL1A1), and lactase (LCT) genes and severe postmenopausal osteoporosis as well as bone mineral density (BMD).
COL1A1	15453937	Similarities between osteoporosis and otosclerosis have been noted, including a similar association with the COL1A1 gene.
COL1A1	22057139	A haplotype derived from the common variants at the -1997G/T and Sp1 binding site of the COL1A1 gene influences risk of postmenopausal osteoporosis in India.
COL1A1	15466008	The collagen type I alpha 1 (COL1A1) gene is a prominent candidate gene for osteoporosis.
COL1A1	26400328	In conclusion, the COL1A1 gene -1997G/T polymorphism might not be a risk factor for osteoporosis in postmenopausal women.
COL1A1	20798928	UNLABELLED: A meta-analysis of studies was conducted involving 24,511 participants with 7,864 fractures in which polymorphisms in the 5' flank of COL1A1 (rs1107946, rs2412298, and rs1800012) were related to osteoporosis phenotypes.
COL1A1	25061805	Lrp 5 deficiency (Lrp5-/-) as well as osteoblast-specific overexpression of Krm2 in mice (Col1a1-Krm2) result in severe osteoporosis occurring at young age.
COL1A1	26628959	Haplotype studies may become one important future direction of study to further elucidate whether and how various COL1A1 polymorphisms affect bone health, osteoporosis and fracture.
COL1A1	26400328	In a subgroup analysis by nationality, the results also showed that no significant associations between the COL1A1 gene -1997G/T polymorphism and osteoporosis risk existed in either Caucasian or Asian populations.
COL1A1	19877060	In contrast, gene expression analysis revealed down-regulation of RUNX2, Sp7, COL1A1, SPARC, and SPP1 in patients with osteoporosis, associated with a lower OPG:RANKL ratio.
COL1A1	12868700	The distribution of the Taq 1 polymorphism in the vitamin D receptor (VDR) gene and the MSc 1 polymorphism in the collagen 1 alpha 1 (COL1A1) gene were studied in 266 female and 55 male patients attending an osteoporosis clinic.
COL1A1	14734826	This study demonstrates for the first time that pyrosequencing can be used for rapid identification of the osteoporosis-associated single nucleotide polymorphism (SNP) in the COL1A1 gene.
COL1A1	19429913	Promoter and intron 1 polymorphisms of COL1A1 interact to regulate transcription and susceptibility to osteoporosis.
COL1A1	11285309	We previously described a polymorphic Sp1 binding site in the COL1A1 gene that has been associated with osteoporosis in several populations.
COL1A1	26400328	No significant association was found between the -1997G/T polymorphism in the COL1A1 gene and osteoporosis risk in the total population analysis (TT vs GG: OR = 1.28, 95%CI = 0.76-2.17; TT vs GT: OR = 1.04, 95%CI = 0.60-1.78; dominant model: OR = 0.84, 95%CI = 0.50-1.40; recessive model: OR = 1.18, 95%CI = 0.84- 1.66).
COL1A1	26400328	Studies investigating the association between the COL1A1 gene -1997G/T polymorphism and the risk of osteoporosis in postmenopausal women have reported conflicting results.
COL1A1	20798928	INTRODUCTION AND HYPOTHESIS: Polymorphisms in the 5' flank of COL1A1 gene have been implicated as genetic markers for susceptibility to osteoporosis, but previous studies have yielded conflicting results.
COL1A1	23731710	CONCLUSIONS: The expression pattern of IL17RC, COL1A1, and ESR1 can be useful in osteoporosis detection, which may help in identifying those populations at high risk for osteoporosis, and in directing treatment of osteoporosis.
COL1A1	11085801	OBJECTIVE: To analyse the distribution of polymorphism of the collagen type Ialpha1 gene (COL1A1) and its relationship with bone metabolism and bone turnover in men with idiopathic osteoporosis.
COL1A1	15241219	Recently, a strong association has been described between osteoporosis and an Sp1 binding site of putative functional significance in the first intron of the COL1A1 gene.
COL1A1	20436912	Here we show that Kremen-2 (Krm2) is predominantly expressed in bone, and that its osteoblast-specific over-expression in transgenic mice (Col1a1-Krm2) results in severe osteoporosis.
COL1A1	26628959	CONCLUSIONS: Our results suggested the possibility of the COL1A1 -1997G/T and the -1663indelT polymorphisms individually playing very little role in osteoporosis and fracture, although more studies are needed especially for the analysis of association between these two polymorphisms and fracture.
COL1A1	15814304	We previously described two polymorphic sites in the COL1A1 gene promoter, -1997 G/T and -1663indelT, which have been associated with bone mineral density (BMD), a surrogate trait for osteoporosis.
COL1A1	15241219	Association of otosclerosis with Sp1 binding site polymorphism in COL1A1 gene: evidence for a shared genetic etiology with osteoporosis.
COL1A1	23065268	Because a variety of functions to affect susceptibility to the formation of osteoporosis VDR-F, VDR-B, COL1A1, ESR1X, ESR1P and CTR are thought to be candidate genes.
COL1A1	24566004	This population-based study indicates that COL1A1 Sp1 polymorphism may contribute to the development of osteoporosis in combination of osteoporosis risk factors in Turkish postmenopausal women.
COL1A1	19429913	Three polymorphisms (-1997G/T; -1663IndelT and +1245G/T) have been identified in the 5' flank of COL1A1 gene that are associated with osteoporosis but the underlying mechanism is unclear.
COL1A1	15241219	CONCLUSION: Some cases of otosclerosis and osteoporosis could share a functionally significant polymorphism in the Sp1 transcription factor binding site in the first intron of the COL1A1 gene.
COL1A1	23985982	Association Between Polymorphisms of VDR, COL1A1, and LCT genes and bone mineral density in Belarusian women with severe postmenopausal osteoporosis.
COL1A1	20798928	Polymorphisms in the 5' flank of COL1A1 gene and osteoporosis: meta-analysis of published studies.
COL1A1	12868700	Do the COL1A1 and Taq 1 vitamin D receptor polymorphisms have a role in identifying individuals at risk of developing osteoporosis?
COL1A1	22057139	The aim of the present study was to investigate the association between Collagen 1 alpha 1 (COL1A1) polymorphism and osteoporosis in DEXA verified 349 (145 osteoporotic, 87 osteopenic and 117 normal) postmenopausal women of India, who were not taking hormone replacement therapy.
COL1A1	23028809	enhanced mRNA expression of known osteoporosis-associated genes (LRP5, RUNX2, COL1A1) and of genes involved in osteoclastogenesis (CSF1, PTH1R), but most notably of genes coding for inhibitors of WNT and BMP signaling, such as Sclerostin and MAB21L2.
COL1A1	19429913	This is consistent with a model whereby increased COL1A1 transcription predisposes to osteoporosis, probably by increasing production of the alpha 1 chain and disrupting the normal ratio of collagen type 1 alpha 1 and alpha 2 chains.
COL1A1	24566004	Combined effects of collagen type I alpha1 (COL1A1) Sp1 polymorphism and osteoporosis risk factors on bone mineral density in Turkish postmenopausal women.
COL1A1	20724381	Collagen type I alpha 1 (COL1a1), which encodes the primary subunit of type I collagen, the main structural and most abundant protein in vertebrates, harbors hundreds of mutations linked to human diseases like osteoporosis and osteogenesis imperfecta.
COL1A1	26628959	Association of COL1A1 polymorphisms with osteoporosis: a meta-analysis of clinical studies.
COL1A1	24133532	A genetic variation (Sp1) in intron 1 of COL1A1 gene has been associated to modulation of expression of the alpha 1 chain of collagen type 1 and it is considered a candidate polymorphism for predisposition to osteoporosis status and fragility fractures.
COL1A1	22057139	These results suggest that GT haplotype of COL1A1 gene is associated with a higher risk of postmenopausal osteoporosis in Northwest Indian women.
COL1A1	14734826	Rapid genotyping of the osteoporosis-associated polymorphic transcription factor Sp1 binding site in the COL1A1 gene by pyrosequencing.
COL1A1	15824851	MATERIALS AND METHODS: Here we analyzed COL1A1, COL1A2, and LRP5 for mutations in 20 pediatric patients with primary osteoporosis characterized by low BMD, recurrent fractures, and absent extraskeletal manifestations.
COL1A1	22489040	Little of the underlying disease etiology has been elucidated thus far, although several studies have suggested that COL1A1 may play a role based on its importance in bone metabolism and other diseases like osteoporosis and osteogenesis imperfecta.
COL1A1	12384955	Is the Sp1 polymorphism in the COL1A1 gene a risk factor for postmenopausal osteoporosis?
COL1A1	9833939	To identify subjects with diabetes who may be at risk of developing osteoporosis and fractures, we analysed bone mineral density in relation to the biochemical markers of bone turnover, calcium homeostasis and the COL1A1 genotype in a group of premenopausal women with Type I (insulin-dependent) diabetes mellitus (n = 31), Type II (non-insulin dependent) diabetes mellitus (n = 21) and control subj…
COL1A1	24273577	Evaluation and identification of damaged single nucleotide polymorphisms in COL1A1 gene involved in osteoporosis.
COL1A1	12491092	We investigated polymorphisms of the following five commonly used markers of four prominent BMD candidate genes with the purpose of identifying useful genetic markers for osteoporosis genetic research in Chinese: the Sp1 and RsaI polymorphisms of the collagen type 1 alpha l (Col1a1) gene, the -174G/C promoter polymorphism of the interleukin 6 (IL-6) gene, the Asn363Ser polymorphism of the glucoco…
COL1A1	24566004	The collagen type I alpha1 (COL1A1) gene is suggested to be implicated in reduced bone mineral density (BMD) in osteoporosis.
COL1A1	11522109	Polymorphism in the Sp1 binding site in the first intron of the COL1A1 gene has been related to increased risk of osteoporosis in several populations.
COL1A1	23137636	In this study, we have investigated the association between osteoporosis and osteocalcin (BGLAP) -298 C>T, estrogen receptor 1 (ER1) 397 T>C, collagen type1 alpha 1 (Col1A1) 2046 G>T and calcitonin receptor (CALCR) 1340 T>C polymorphisms.
COL1A1	10025922	OBJECTIVE: To examine the relationship between a common polymorphism within intron 1 of the COL1A1 gene and osteoporosis in a nested case-control study.
COL1A1	26400328	COL1A1 gene -1997G/T polymorphism and risk of osteoporosis in postmenopausal women: a meta-analysis.
COL1A1	11285309	We conclude that the COL1A1 Sp1 polymorphism is a functional genetic variant that predisposes to osteoporosis by complex mechanisms involving changes in bone mass and bone quality.
COL1A1	24566004	In the present study, the investigation of the effects of Sp1 polymorphic variants of COL1A1 gene on BMD values, and the determination of the association between COL1A1 Sp1 gene variants and osteoporosis risk factors in the context of gene-environment interaction in Turkish postmenopausal women were aimed.
COL1A1	23985982	Polymorphic sites in osteoporosis predisposition genes (ApaI, BsmI, TaqI, and Cdx2 of the VDR gene, G2046T of the COL1A1 gene, and T-13910C of the LCT gene) were determined using the polymerase chain reaction on the deoxyribonucleic acid isolated from dried bloodspots.
GTPBP1	7354241	In 40 patients with postmenopausal osteoporosis, the mean value for serum iPTH assayed by antiserum GP-1M did not differ significantly from that for age-matched normal women; however, three osteoporotic patients had elevated values and thus appear to represent a separate population.
DEFA4	22960237	Compressive strength index (CSI) is a newly established index for predicting hip fracture, the most serious consequence of osteoporosis.
A1CF	15355557	Ac.f was also computed for a group of older healthy postmenopausal women and a group of women with untreated osteoporosis studied earlier by the same biopsy (Bx) and labeling protocol.
A1CF	15355557	Ac.f was not significantly greater in the osteoporosis patients than in the older postmenopausal normals.
A1CF	15355557	UNLABELLED: Bone remodeling rates (Ac.f) were measured in transilial biopsy specimens from 50 healthy premenopausal women before and 1 year after menopause, in 34 healthy women 13 years past menopause, and in 89 women with untreated osteoporosis.
A1CF	15355557	We examined bone remodeling rates before and after menopause and in women with osteoporosis by measurements of activation frequency (Ac.f, #/year) in transilial bone biopsy specimens.
A1CF	15355557	Ac.f nearly doubled 1 year after menopause, tripled 13 years after menopause, and remained elevated in women with osteoporosis.
PDIA3	24120669	In addition, our proteomic study of the Hobit secretome revealed that risedronate induced the expression of ERp57, HSP60 and HSC70, three proteins already shown to be associated with the prevention of bone loss in osteoporosis.
SNRNP70	22013543	BMP2 SNP1 (Ser37Ala) genotypes were found to have similar low frequency in control subjects and men with osteoporosis.
CLC	20830208	Furthermore, the robust solid-supported membrane-based electrophysiological assay is proposed for rapid screening for potential ClC-7 inhibitors which are discussed for treatment of osteoporosis.
CLC	23390581	These simple and robust functional assays of ClC-7 transport are well-suited to be applied in HTS of small-molecule inhibitors and may help to develop drugs suited for the treatment of osteoporosis.
CLC	16391718	The role of chloride channels in osteoclasts: ClC-7 as a target for osteoporosis treatment.
CLC	16391718	Thus, ClC-7 inhibitors may prove to be potent for prevention and treatment of osteoporosis.
CLC	9519207	Similarly, subtle abnormalities in the function of the electroneutral sodium-(potassium)-chloride cotransporters (NKCC2 and NCCT) and the renal CLC-type chloride channels (CLC5) may be major determinants of urinary calcium excretion with roles in the pathogenesis of 'idiopathic' hypercalciuria and osteoporosis.
CLC	23390581	Thus, drugs targeted at ClC-7 have been proposed for ameliorating osteoporosis.
CLC	16391718	Inhibition of ClC-7 constitutes a new potential way to treat osteoporosis.
CLC	21061117	The Cl⁻ channel/transporter ClC7 is crucial for osteoclastic bone resorption and might become a therapeutic target for osteoporosis.
CLC	19393632	CLC-7: a potential therapeutic target for the treatment of osteoporosis and neurodegeneration.
MTHFR	23554658	Women with the TT genotype of the MTHFR gene have lower BMD, suggesting that the TT genotype may be a risk factor for postmenopausal osteoporosis.
MTHFR	25981594	Effect of MTHFR, TGFβ1, and TNFB polymorphisms on osteoporosis in rheumatoid arthritis patients.
MTHFR	15952099	BACKGROUND & AIMS: Hyperhomocysteinemia, a risk factor for thrombosis, recurrent miscarriages, and osteoporosis, might derive from acquired folate and vitamin B 12 deficiencies and from a C677T mutation in methylene-tetrahydrofolate reductase (MTHFR) gene.
MTHFR	19037576	SUMMARY: Few studies have evaluated the effects of homocysteine and methylenetetrahydrofolate reductase (MTHFR) genotype on age-related bone loss.
MTHFR	14727014	Previous studies concerning association of the common point mutation C677T in methylentetrahydrofolate reductase (MTHFR) and osteoporosis have revealed contradictory results.
MTHFR	17712717	The C677T (rs1801133) polymorphism of MTHFR (methylenetetrahydrofolate reductase) has been associated with the risk of cardiovascular events, and also with osteoporosis in some studies.
MTHFR	24014470	Investigation of subsequent fetal losses revealed homozygosity for the methylenetetrahydrofolate reductase (MTHFR) C677T polymorphism associated both with fetal loss and with osteoporosis (OP).
MTHFR	22377704	The objective of the present study was to investigate the association(s) among MTHFR C677T, MTHFR A1298C, and OPG A163G polymorphisms in Mexican patients with rheumatoid arthritis and osteoporosis.
MTHFR	23936976	Association of MTHFR C677T polymorphism with bone mineral density of osteoporosis in postmenopausal Thai women.
MTHFR	22377704	MTHFR polymorphisms C677T and A1298C are associated with reduced MTHFR enzyme activity and hyperhomocysteinemia, which has been associated with osteoporosis.
MTHFR	16133647	However, as plasma total homocysteine (tHcy) and plasma folate can be regarded as short-term markers when compared to a long-term variable such as BMD, in this study we tested the hypothesis that low red blood cell 5-methyltetrahydrofolate (RBC 5-MTHFR) as a long-term marker of the folate status may be a better predictor of BMD than plasma 5-MTHF, and its deficiency may contribute to the pathogen…
MTHFR	17174622	Previous studies have shown that homocysteine level and the C677T polymorphism in the gene encoding methylenetetrahydrofolate reductase (MTHFR) may be involved in the development of osteoporosis and its related fracture in European populations.
MTHFR	17903296	Evidence for association (FBAT or GEE p < 0.05) was observed for several SNPs in candidate genes for osteoporosis, such as rs1801133 in MTHFR; rs1884052 and rs3778099 in ESR1; rs4988300 in LRP5; rs2189480 in VDR; rs2075555 in COLIA1; rs10519297 and rs2008691 in CYP19, as well as SNPs in PPARG (rs10510418 and rs2938392) and ANKH (rs2454873 and rs379016).
MTHFR	12674333	A common methylenetetrahydrofolate reductase (C677T) polymorphism is associated with low bone mineral density and increased fracture incidence after menopause: longitudinal data from the Danish osteoporosis prevention study.
MTHFR	12674333	MTHFR genotyping was done in 1748 healthy postmenopausal Danish women participating in a prospective study of risk factors for osteoporosis.
MTHFR	23554658	The role of C677T polymorphism of methylenetetrahydrofolate reductase (MTHFR) gene has been investigated in postmenopausal osteoporosis.
MTHFR	16133647	This study suggests that RBC 5-MTHF is a better predictor of BMD than plasma 5-MTHFR when compared to a long-term marker such as BMD, and its deficiency is associated with low BMD that may contribute to the pathogenicity of osteoporosis in postmenopausal women.
MTHFR	22377704	MTHFR C677T, MTHFR A1298C, and OPG A163G polymorphisms in Mexican patients with rheumatoid arthritis and osteoporosis.
MTHFR	24014470	Pregnancy-associated osteoporosis with a heterozygous deactivating LDL receptor-related protein 5 (LRP5) mutation and a homozygous methylenetetrahydrofolate reductase (MTHFR) polymorphism.
MTHFR	15336613	Results from this study suggest hyperhomocysteinemia as a result of folate deficiency, but not methylenetetrahydrofolate reductase polymorphism, is independently associated with low bone mineral density and may contribute to the pathogenicity of osteoporosis in postmenopausal Iranian women.
MTHFR	23936976	The association between MTHFR C677T polymorphism with osteoporosis in postmenopausal Thai women is hitherto unclear.
MTHFR	22377704	The associations of the MTHFR C677T polymorphism with osteoporosis/osteopenia and femoral neck BMD suggest that these polymorphisms confer a risk of developing osteoporosis in patients with rheumatoid arthritis, a risk that may be reduced with folate and B complex supplementation.
MTHFR	15018490	Most work in this area of osteoporosis research has focused on the candidate gene approach, which has identified several candidate genes for osteoporosis, including genes encoding the vitamin D receptor (VDR), oestrogen receptors (alpha and beta), apolipoprotein E, collagen type I alpha 1 and methylenetetrahydrofolate reductase, amongst many others.
GSS	22386813	However, the active ingredient and the mechanisms underlying the anti-osteoporosis activity of GSS have not been clearly elucidated.
GSS	22386813	Taken together, our data suggest that ginsenoside Rb1 is one of the effective components of GSS for the anti-osteoporosis activity and can inhibit osteoclastogenesis by suppressing RANKL-induced activation of both JNK and p38 MAPKs and NF-κB pathways, and consequently down-regulating the gene expression of c-Fos and NFATc1 in osteoclast precursors.
GSS	22386813	Ginsenosides (GSS), the main active components of ginseng, have been reported possessing anti-osteoporosis activity in ovariectomized rats.
PTOV1	20394422	3-(3-Pyridyl)-2-hydroxy-2-phosphonopropanoic acid (3-PEHPC, 1) is a phosphonocarboxylate (PC) analogue of 2-(3-pyridyl)-1-hydroxyethylidenebis(phosphonic acid) (risedronic acid, 2), an osteoporosis drug that decreases bone resorption by inhibiting farnesyl pyrophosphate synthase (FPPS) in osteoclasts, preventing protein prenylation.
PTOV1	21820091	We report 20 children with a variety of underlying primary diagnoses with associated secondary osteoporosis, who were treated with 3 monthly zoledronic acid for 2 years (annualised dose 0.1mg/kg/year).
PTPN11	25593124	Shp2 or its signaling partners could potentially serve as pharmacological targets to regulate the population of OCs locally and/or systematically, and thus treat OC-related diseases, such as periprosthetic osteolysis and osteoporosis.
PRDM2	20508921	We confirm that genetic variants in ESR1 and ESR2, but not RIZ1, are important in osteoporosis.
SMAD3	14727154	We report results of an association study between BMD and nine candidate genes ( TGFB1, TGFBR2, SMAD2, SMAD3, SMAD4, IFNB1, IFNAR1, FOS and LRP5), as well as of a case-control study of osteoporosis.
PHKA2	17537919	Furthermore, the daily administration of a small-molecule PYK2 inhibitor increases bone formation and protects against bone loss in ovariectomized rats, an established preclinical model of postmenopausal osteoporosis.
PHKA2	17537919	In summary, we find that PYK2 regulates the differentiation of early osteoprogenitor cells across species and that inhibitors of the PYK2 have potential as a bone anabolic approach for the treatment of osteoporosis.
FOXP3	26559023	In conclusion, the current results suggest that DHEA can improve postmenopausal osteoporosis (PMO) by up-regulating osteoblast differentiation via the up-regulation of the expression of osteoblastogenesis-related genes and via an increase in Foxp3(+) Tregs.
FOXP3	20506516	Ovariectomy was performed in FoxP3-Tg mice as a model of postmenopausal osteoporosis, and the bone parameters were analyzed.
PPP3CA	23548455	DISCUSSION AND CONCLUSIONS: Immobilization and off-loading does not lead to marked disuse osteoporosis in patients with acute CNA after 6 months of treatment.
PTGDR	11537547	These include technological breakthroughs in such areas as: (1) diagnosis, treatment, and prevention of cardiovascular diseases, (2) new approaches to the understanding of osteoporosis, (3) early detection of genetic birth defects, (4) emergency medical care, and (5) treatment of chronic metabolic disorders.
PTGDR	18981975	AIM: Nodular thyroid disease and osteoporosis share some common factors such as: 1) elevated frequency in the general population; 2) major prevalence in the female sex; 2) incidence proportional to the age.
OR2J1	23103928	After adjusting for all covariables, densitometric osteoporosis was associated with increased age [odds ratio (OR)(65-69 years): 2.84, 95% confidence interval (CI): 1.75-4.61; OR(70-74 years): 4.01, 95% CI: 2.47-6.52; OR(75+years): 5.96, 95% CI: 3.27-10.87] and inversely associated with high BMI (OR(25.0-29.9): 0.51, 95% CI: 0.34-0.76; OR(≥ 30): 0.30, 95% CI: 0.19-0.46).
OR2J1	23103928	Morphometric vertebral fracture was associated with age (OR(65-69 years): 2.04, 95% CI: 1.03-4.05; OR(70-74 years): 4.05, 95% CI: 2.11-7.77; OR(75+years): 8.43, 95% CI: 3.97-17.93), poor educational level (OR: 1.70, 95% CI: 1.06-2.72) and with densitometric osteoporosis and BMI ≥ 30 kg/m(2) (OR: 3.35, 95% CI: 1.85-6.07).
OR2J1	21079541	Finally, neck pain and low back pain were also associated with several other chronic conditions, particularly arthrosis (OR: 6.5, 95% CI: 6.0-7.0), and headaches (OR: 4.3, 95% CI: 3.9-4.8) for neck pain, and both arthrosis (OR: 5.7, 95% CI: 5.3-6.2), and osteoporosis (OR: 6.3, 95% CI: 5.6-7.2), for low back pain.
MEPE	15108058	MEPE was mainly expressed by osteocytes embedded in the matrix of mineralized bone from patients with osteomalacia or osteoporosis.
MEPE	14223536	INTESTINAL ABSORPTION OF 45CA DYNAMICS OF 45CA IN GASTRECTOMY OSTEOPOROSIS.
MEPE	15108058	We also compared the MEPE positivity of osteocytes in mineralized bone and non-mineralized osteoid obtained from patients with osteomalacia and osteoporosis.
MEPE	21452281	Among the most distinctly expressed genes were Wnt antagonists DKK1 and SOST, the transcription factor SOX4, and the bone matrix proteins MMP13 and MEPE, all reduced in osteoporosis versus control groups.
MEPE	15108058	Among osteoporosis patients, MEPE positivity was found in 95.3 +/- 0.5% of the osteocytes from mineralized bone compared with 4.9 +/- 5.7% of those from osteoid.
GNAS	17103447	Bone and cartilage and their disorders are addressed under the following headings: functions of bone; normal and abnormal bone remodeling; osteopetrosis and osteoporosis; epithelial-mesenchymal interaction, condensation and differentiation; osteoblasts, markers of bone formation, osteoclasts, components of bone, and pathology of bone; chondroblasts, markers of cartilage formation, secondary carti…
OR10J5	21402608	Adjusting for possible confounders, those with a history of cancer were more likely to experience depression (adjusted odds ratio [OR], 1.15; 95% CI, 1.02 to 1.30; P = .023), falls (adjusted OR, 1.17; 95% CI, 1.04 to 1.32; P = .010), osteoporosis (adjusted OR, 1.21; 95% CI, 1.06 to 1.38; P = .004), hearing trouble (adjusted OR, 1.28; 95% CI, 1.08 to 1.52; P = .005), and urinary incontinence (adju…
FBN2	21755248	CONCLUSIONS: In women referred for routine osteoporosis screening, the relationship between CCA, atherosclerosis and osteoporosis can be demonstrated using either cortical or trabecular BMD.
GHR	10993598	This is shown by reduced systemic IGF and IGFBP-3-levels in osteoporosis suggesting a decrease of endogenous GH-secretion or a dysregulation of the GH receptor system which is beyond the normal ageing process of the GH/IGF system, the "somatopause".
GHR	23812803	These results suggest that the SNP rs6873545 can be used as a surrogate for the GHR fl/d3 polymorphism due to linkage disequilibrium in the Brazilian population and that the fl/fl genotype is a severity-related risk factor for osteoporosis, but did not appear to be associated with disease status.
GHR	23812803	The purpose of this study was to investigate the association between the GHR exon 3 fl/d3 polymorphism and body composition traits in Brazilian cohorts of normal post-menarche adolescent girls and in post-menopausal women with and without osteoporosis.
GHR	15049968	BACKGROUND: Adult GH deficiency (AGHD) is associated with osteoporosis and reduced bone turnover; factors improved by GH replacement (GHR), with men gaining greater benefit than women.
RTN4R	26362186	Our results showed that NGR1 stimulates osteogenic differentiation of cultured osteoblasts by activating ER signaling and in turn might be a potential therapeutic alternative for the prevention and treatment of osteoporosis.
SIRT6	26189760	Here we show that SIRT6 deficiency in mice produces low-turnover osteopenia caused by impaired bone formation and bone resorption, which are mechanisms similar to those of age-related bone loss.
CARD18	19841459	Identification of osteoporosis risk genes: the tip of the iceberg.
CARD18	10898079	Osteoporosis in patients with rheumatoid arthritis: tip of the iceberg?
LCT	25412022	We evaluated the structure–function relationship in trabecular bone after bone loss (disuse-induced osteoporosis)and bisphosphonate treatment (antiresorptive therapy using risedronate) in canine trabecular bone using lCT and ultrasound wave propagation.
LCT	23985982	The aim of this study was to analyze the association between the polymorphisms of the vitamin D receptor (VDR), type I collagen (COL1A1), and lactase (LCT) genes and severe postmenopausal osteoporosis as well as bone mineral density (BMD).
LCT	23985982	The findings of this study suggest that at least the ApaI and BsmI polymorphisms of the VDR gene and T-13910C of the LCT gene are associated with the risk of postmenopausal osteoporosis in our sample of the Belarusian women.
LCT	23985982	Association Between Polymorphisms of VDR, COL1A1, and LCT genes and bone mineral density in Belarusian women with severe postmenopausal osteoporosis.
LCT	23985982	The data showed that the ApaI and BsmI polymorphisms of the VDR gene and T- 13910C of the LCT gene were associated with severe postmenopausal osteoporosis in the analyzed Belarusian women (P<0.01).
LCT	18080747	The LCT 13910 C/T polymorphism as a risk factor for osteoporosis, has no impact on metastatic bone disease in breast cancer.
LCT	23985982	Polymorphic sites in osteoporosis predisposition genes (ApaI, BsmI, TaqI, and Cdx2 of the VDR gene, G2046T of the COL1A1 gene, and T-13910C of the LCT gene) were determined using the polymerase chain reaction on the deoxyribonucleic acid isolated from dried bloodspots.
LCT	17103297	INTRODUCTION AND HYPOTHESIS: Adult-type hypolactasia (HL) defined by the LCT(-13910) polymorphism may reduce calcium intake by reducing dairy consumption and, therefore, promote osteoporosis.
DVL2	24727453	Taken together, our results indicate that RNF185 negatively regulates osteogenesis through the degradation of Dvl2 and down-regulation of canonical Wnt signaling pathway and suggest a possible therapeutic target in osteoporosis.
DPP4	26259132	In the highest DPP4 quartile, osteoporosis risk was significantly higher (odds ratio, 3.01; 95% confidence interval, 1.66-5.43) than in the lowest quartile after adjustment for potential confounders.
DPP4	26259132	The risk for osteoporosis increased more with higher levels of DPP4 activity, HOMA-IR, IL-6, and hs-CRP (P < .05), but not with higher levels of triglyceride and total cholesterol or lower levels of active GLP-1.
DPP4	26259132	CONCLUSIONS: This study shows that increased DPP4 activities are independently associated with osteoporosis.
DPP4	2904308	These results suggest that high activities of dipeptidyl peptidase IV in serum of patients with osteoporosis are probably related to its severity.
DPP4	26259132	Plasma DPP4 Activities Are Associated With Osteoporosis in Postmenopausal Women With Normal Glucose Tolerance.
DPP4	26259132	OBJECTIVE: To investigate the association between plasma DPP4 activities and osteoporosis.
DPP4	18508462	DPP IV and related dipeptidase enzymes cleave a wide range of physiological peptides and have been associated with several disease processes including Crohn's disease, chronic liver disease, osteoporosis, multiple sclerosis, eating disorders, rheumatoid arthritis, cancer, and of direct relevance to this review, type 2 diabetes.
PLEKHO1	23995790	Casein kinase-2 interacting protein-1 (CKIP-1; also known as PLEKHO1) is crucial during adult bone formation and is a promising drug target for osteoporosis therapy.
PLEKHO1	24246247	In this study, we aimed to identify a cross-species siRNA sequence targeting CKIP-1 to facilitate developing a novel RNAi-based bone anabolic drug for reversing established osteoporosis.
PLEKHO1	26040545	Biofunctionalization with siRNA targeting the key negative modulators of bone turnover involved in the molecular mechanism of osteoporosis, such as casein kinase-2 interacting protein-1 (Ckip-1), may lead to enhanced Ti osseointegration in the osteoporotic condition.
PLEKHO1	22878216	Strikingly, CKIP-1 has been recently demonstrated to be a promising target for treatment of osteoporosis in rat models.
APOC3	16121806	The 20 genes with at least a 3-fold change, annotated with known phenotypic associations in the current gene databank (phenotype association, fold change) were aspartoacylase (Canavan disease, 9.96), growth hormone receptor (Laron dwarfism, idiopathic short stature, 8.25), lipoprotein lipase (familial chylomicronemia syndrome, lipoprotein lipase deficiency, 8.00), vitamin D (1,25- dihydroxyvitami…
CD38	19680108	Qualitative analysis showed that the intersection of an anterior-midpoint line and a posterior-midpoint line drawn on the superior vertebral body surface (T6-T10) created an "angle of depression" in the osteoporosis group whereas an "angle of elevation" was identified in the Scheuermann group.
CD38	8380946	Fourteen of the 19 patients (73.6%) presented with CNS complications characterized by: diffuse multifactorial encephalopathy (5 patients); leukoencephalopathy (2 patients) which required temporary (1 case) or permanent (1 case) discontinuation of cyclosporine A; hemorrhage (in 2 cases due to arterial hypertension and coagulopathy and another due to unknown causes); ischemic/anoxic injury secondar…
CD38	19680108	Contrary to the control and Scheuermann groups, the M/P indexes (T6-T10) were significantly smaller than the A/M indexes in the osteoporosis group.
CD38	17657555	With middle- and high-grade osteoporosis (groups C and D, respectively), the maximum CPS at T10 was relatively high with or without compensated posture, except for the 0 degrees model.
CD38	17657555	The maximum CPS at T10 increased based on the increases in both the grade of osteoporosis and the kyphotic angle.
CD38	19680108	RESULTS: The second derivative (A/M)/(M/P) indexes of thoracic vertebrae T6-T10 were significantly greater in the osteoporosis group than in the control and Scheuermann groups (P < 0.05).
CD38	24319620	An 82-year-old female with a T9 burst fracture and a history of osteoporosis underwent minimally invasive instrumentation from T5 to T12, fusion from T7 to T11, and decompression from T8 to T10.
CNOT4	17943692	In a cross-sectional survey we studied whether German GPs (1) are aware of osteoporosis as an urgent health problem, (2) felt competent to manage patients with osteoporosis, (3) knew and used the national guideline for osteoporosis treatment and if not, (4) which barriers prevented them from doing so.
SERPINB9	19752622	METHODS: We studied 12 postmenopausal women (63.8 +/- 7.3 years) who were not receiving osteoporosis therapy, and had stones comprised of calcium phosphate (CaP; n = 3), calcium oxalate (CaOx; n = 3) and CaP + CaOx (n = 6).
OTOR	10639889	Osteoporosis may have once been considered just another harbinger of the aging process, like liver spots, gray hair and big ears.
OTOR	23872379	Meanwhile, bone turnover biomarkers and bone mineral density were investigated to identify the specific changes of potential anti-osteoporosis effects of FDP-Sr.
OTOR	26425285	Risk for osteoporosis of low calcium (Ca) intake, under the EAR, showed an odds ratio of 2.13(95% CI; 1.26-3.61, P < 0.05).
OTOR	25491117	Because vestibular dysfunction often affects the elderly, these results also suggest that age-related bone loss might have a vestibular component and that patients with inner ear pathologies might be at risk for fracture.
OTOR	24664275	External auditory canal and middle ear cholesteatoma and osteonecrosis in bisphosphonate-treated osteoporosis patients: a Danish national register-based cohort study and literature review.
OTOR	23872379	The differences in metabolic profiles between osteoporosis rats and FDP-Sr treated rats were well observed by the partial least squares-discriminant analysis (PLS-DA) to the MS spectra.
OTOR	22426695	CONCLUSION: FDP-Sr may be an effectve treatment for postmenopausal osteoporosis that acts, in part, via a decrease in osteoclastogenesis through the OPG\RANKL\RANK pathway.
OTOR	23872379	Some metabolites including homocysteine, arachidonic acid, alanine, and hydroxyproline, which significantly changed during osteoporosis progression could be effectively reversed after FDP-Sr therapy.
OTOR	25826107	In the age- and energy-adjusted logistic regression models, participants consuming less protein, vitamin B2, or vitamin C than the estimated average requirement (EAR) showed higher odds of having osteoporosis than their counterparts.
OTOR	26171780	Hence, we recommend that otolaryngologists evaluate the condition of the middle ear of patients with osteoporosis.
OTOR	596113	The clinical picture of the patient included the following characteristics: prominent occiput, small chin, deep-seated and dysplastic ears, abnormal vortices of the hair, divided tip of the tongue, high palate, small finger and toe nails, inguinal hernia both sides, undescended but normal sized testes, hypotonic musculature and overextensible joints, retardation of ossification in the left hand b…
OTOR	23872379	These results delineated the FDP-Sr effects-related metabolic alterations in the bone loss rats, suggesting that metabonomic analysis could provide helpful information on the new potential biomarkers relating to the mechanism of anti-osteoporosis action and side effects of FDP-Sr against estrogen deficiency induced bone loss.
OTOR	22808523	B. aristata extracts and its formulations are also useful in the treatment of diarrhoea, haemorrhoids, gynaecological disorders, HIV-AIDS, osteoporosis, diabetes, eye and ear infections, wound healing, jaundice, skin diseases and malarial fever.
OTOR	19579756	All cases had failure to thrive, microcephaly, ear dysplasia, laryngomalacia, hearing impairment, gastro-esophageal reflux disease, constipation, abnormal dentition, dermatitis/acrodermatitis enteropathica, hyperpigmentation of the skin, very low insulin-like growth factor I levels with delayed bone age, relative hypolipidemia, initial camptodactyly/joint contracture, progressive kyphoscoliosis, …
OTOR	24664275	Our aim was to describe the incidence of external auditory canal and middle ear diseases in Danish patients exposed to BPs in the treatment of osteoporosis.
OTOR	25800473	Hashimoto's thyroiditis was found in 11.1% of patients, gastrointestinal abnormalities in 8.9%, ear nose and throat problems in 22.6%, dermatologic problems in 21.8% and osteoporosis in 15.3%.
OTOR	23872379	Metabonomic profiling in studying anti-osteoporosis effects of strontium fructose 1,6-diphosphate on estrogen deficiency-induced osteoporosis in rats by GC/TOF-MS. A novel strontium salt compound strontium fructose 1, 6-diphosphate (FDP-Sr) has been proved to have highly effective for bone loss via dual effects of stimulating bone formation and suppressing bone absorption.
OTOR	21345324	Synthesis and pharmacokinetics of strontium fructose 1,6-diphosphate (Sr-FDP) as a potential anti-osteoporosis agent in intact and ovariectomized rats.
OTOR	16691464	The latter involves potential applications to a whole host of diseases ranging from cancer to those that affect bones (osteoporosis), ears (hearing), eyes (macromolecular degeneration), the heart (hypercholesterolemia/cardiac arrest,), immune system (immune deficiency disease), kidney (nephrotoxicity), lungs (cystic fibrosis), pancreas (diabetes and cystic fibrosis), skin (Darier disease), and st…
OSTF1	9299545	These observations indicate that OSF-1 may direct in vivo appositional bone formation by increasing osteoblast activity rather than decreasing osteoclast activity, suggesting a new way to treat osteoporosis with OSF-1.
OSTF1	16946461	Structure-based sequence alignment reveals that the putative proline-rich peptide-binding site of hOSF-SH3 consists of (i) residues that are highly conserved in the SH3-domain family, including residues Tyr21, Phe23, Trp49, Pro62, Asn64 and Tyr65, and (ii) residues that are less conserved and/or even specific to hOSF, including Thr22, Arg26, Thr27, Glu30, Asp46, Thr47, Asn48 and Leu60, which migh…
OSTF1	10875310	Osf2/Cbfa1 and ODF are major targets in the treatment of osteoporosis.
KLK8	23942249	Therefore, α-defensin HNP-1 could be a novel biomarker for osteoporosis.
IFNA2	12107666	After adjusting for all other variables, the osteoporosis densitometric criteria variable was the most strongly associated with fracture (OR = 5 [1.8-13.3]) followed by COLIA1 (OR = 2.1 [1-4.3] per copy of the 'T' allele).
IFNA2	23975234	RESULTS: Minor allele 'T' of rs2228570 showed significant influence for the risk of osteoporosis (OR 1.60, 95%CI 1.16-2.20, P=0.004) and also in dominant (OR 2.32, 95%CI 1.47-3.64, P=0.0006) and additive model (OR 2.41, 95%CI 1.49-3.87, P=0.0006) after Bonferroni correction.
IFNA2	16932874	Particularly, the minor allele of +14G>A was associated with a protective effect on vertebral fracture and higher lumbar bone mineral density, suggesting that +14G>A may be a useful marker for osteoporosis and its related fracture.
IFNA2	16999948	RESULTS: The use of the genotyping in single tube through allele-specific PCR and melting curves has led us to the accurate genotype of three polymorphisms of vdr (cdx-2), osteoprotegerin (A-163G) and ppar-gamma (C-681G) genes in 225 postmenopausal women to be associated to osteoporosis.
IFNA2	12162506	The A allele was associated with increased BMD and was protective against a common form of osteoporotic fracture, suggesting that RUNX2 variants may be related to genetic effects on BMD and osteoporosis.
IFNA2	11357939	These results suggest that the C-509-->T polymorphism, alone or in combination with the T869-->C polymorphism, of the transforming growth factor-beta1 gene is a genetic determinant of bone mass, and that the number of T alleles in the combined genotype is a risk factor for the genetic susceptibility to osteoporosis in postmenopausal Japanese women.
IFNA2	12050122	Finding the susceptibility genes underlying osteoporosis requires identifying specific alleles that coinherit with key heritable phenotypes in bone strength.
IFNA2	23837846	CONCLUSION: These findings indicate that the g.19124G>A genetic polymorphism in the OPG gene is potentially related to BMD and osteoporosis in Chinese postmenopausal women, and the allele A could be associated with a lower BMD and an increased risk factor for osteoporosis.
IFNA2	12396377	CONCLUSIONS: The polymorphisms and allele frequencies obtained in this study will be useful for genetic studies of common diseases such as osteoporosis and rheumatoid arthritis in the Japanese population.
IFNA2	24410296	Unlike the A163G polymorphism, the meta-analysis results revealed that the C allele of the G1181C polymorphism may be associated with a decreased risk of osteoporosis, especially in the Asian and postmenopausal women subgroups.
IFNA2	20010502	The slight, not significant tendency to prevalence of a allele (ApaI polymorphism) in the controls comparing to women with osteoporosis and osteopenia have been noted.
IFNA2	20010502	The presence of A allele (ApaI polymprphism) seems to be weakly connected with osteoporosis susceptibility.
IFNA2	12689684	Frequencies of T and t alleles of VDR did not correlate with disc degeneration, osteophyte formation, or osteoporosis.
IFNA2	24278256	We found that rs6532023 was significantly associated with bone mineral density and osteoporosis (corrected p = 0.015) in our sample, including 440 cases and 640 controls, and allele G was supposed as a risk factor while T worked as a protective factor.
IFNA2	18038108	DBP-Alu alleles *10, *8 and *9, respectively, were the three commonest in both healthy subjects and men with osteoporosis.
IFNA2	12961063	Targeting preventive measures for osteoporosis subjects with risk factors and also disease-susceptibility alleles is likely to be more cost effective.
IFNA2	7502698	Vitamin D receptor gene alleles and osteoporosis: an affirmative view.
IFNA2	22543871	In particular, the greater number of vertebral fractures was found in patients with osteoporosis carrying the G allele of c.531A>G SNP (p = 0.015).
IFNA2	24867796	The allele-A could be a decreased risk factor for osteoporosis.
IFNA2	11157141	CONCLUSIONS: These results indicate that allelic variation at the TGF-beta 1 gene contributes to the development of osteoporosis at the hip.
IFNA2	12195539	It is likely that the alleles are in linkage disequilibrium with functional polymorphism(s) in or nearby the osteocalcin gene, which may contribute to the onset of osteoporosis.
IFNA2	12719077	The segregation of flanking marker alleles of three collagen genes and the interval for osteoporosis-pseudoglioma syndrome were analyzed.
IFNA2	15969245	Also, because of specific ethnic allele distributions, these VDR and ER alpha polymorphisms may be involved in race differences of osteoporosis treatment responses.
IFNA2	24522475	Similarly, there was no difference in genotypes (P = 0.897) or allele frequency (P = 0.825) between Xinjiang Uygur postmenopausal osteoporosis patients and the controls.
IFNA2	15241219	The allelic frequency of the Sp1 site is very similar between otosclerosis and osteoporosis.
IFNA2	10234586	VDR alleles are significant independent predictors of peak femoral neck, but not lumbar spine BMD, even after adjusting for family history of osteoporosis, weight, age, and exercise.
IFNA2	15647972	It is likely that the haplotype allele exerts its influence on bone as early as during young adulthood to increase the risk of osteoporosis later in life.
IFNA2	7557352	Of 870 elderly women participating in an osteoporosis study, 13 were previously found to be homozygous for the APOE*4 allele; 1 was deceased and the rest were assessed for dementia in a "piggyback" study of dementia.
IFNA2	24917365	Furthermore, the frequency of HLA-B* 3501 allele was significantly higher in postmenopausal osteoporosis patients than in the control group (P = 0.033), and the relative risk was 7.632 (95% CI: 0.927-62.850).
IFNA2	21130756	Therefore the f allele of VDR Fok1 gene is an important risk factor for osteoporosis.
IFNA2	9744986	We examined whether the unfavorable "s" allele was associated with low BMD in 64 patients with primary osteoporosis and in 72 healthy controls.
IFNA2	17684412	The genetics of osteoporosis is polygenic in nature with multiple common polymorphic alleles interacting with each other and environmental factors to determine bone mass.
IFNA2	17371163	CONCLUSIONS: The results indicate that the relatively overexpressed VDR Hap1 haplotype could be considered a risk allele for osteoporosis regardless of ethnicity.
IFNA2	15767861	SUMMARY: Identification of pathogenic mutations and allelic variations in LRP5 has improved our understanding of the physiology of bone mass acquisition and the pathophysiology of several bone diseases, including osteoporosis.
IFNA2	18662595	The allele-phenotype relationship was analyzed with the statistical method STRAT that considered population stratification and the results were adjusted with potential confounders for osteoporosis by a longitudinal multivariate model.
IFNA2	12868700	In conclusion, neither of these polymorphisms aid in the prediction of osteoporosis but the VDRT allele may carry an increased fracture risk in patients who require corticosteroid treatment.
IFNA2	23329761	The A-allele was associated with lower BMD and an increased risk for osteoporosis.
IFNA2	9783552	There were 12 HH, 49 Hh, and 99 hh individuals, and the allele frequencies were 22.8% for H and 77.2% for h. To determine if genetic variation influences bone mineral density (BMD) and thus can be a determinant of susceptibility to osteoporosis in older women, we examined the association of BMD with the osteocalcin genotypes found in the present study.
IFNA2	24315820	Within the RA group, TGF-β1 T allele carriers had a significant increased risk to develop osteoporosis (OR=4.4, 95% CI=-2.
IFNA2	23856613	These findings provide more evidence that the SNPs in OPG gene could affect BMD and osteoporosis, and the allele-A of g.19190C>A and allele-G of g.25602A>G genetic variants are associated with increased risk for osteoporosis in Chinese postmenopausal women.
IFNA2	26648999	Also, TT genotype and T allel was found to be associated with plasma total cholesterol, TG, LDLc, HDLc, Tscore, Zscore and SAA1 level in osteoporosis group (P=0.000, P=0.05, and P=0.000, P=0.000, P=0.01, P=0.02, P=0.000 respectively).
IFNA2	22461213	Heterogeneity in drug response may reflect varying responsiveness to osteoporosis treatments due to allele variation in signaling pathway genes such as vitamin D receptor (VDR) or estrogen receptor α (ERα).
IFNA2	24522475	OBJECTIVE: The objective of this study was to investigate genetic susceptibility of calcitonin receptor gene polymorphism (genotypes and allele frequencies) to primary osteoporosis between Han and Uygur patients and healthy controls in the Chinese Xinjiang region.
IFNA2	11212160	These results suggest that IL-6 -174 G-->C alleles may be significant determinants of the risk for osteoporosis in elderly subjects.
IFNA2	15782282	The Lys-allele is associated with lower BMD and an increased risk for osteoporosis.
IFNA2	15861036	Postmenopausal women with osteoporosis from a 3-year study comparing calcitriol versus calcium for prevention of vertebral fractures were genotyped for VDR alleles detected by FokI, BsmI, ApaI and TaqI.
IFNA2	17174622	The T allele carrier tended to have higher risk of having osteoporosis or osteopenia, but the difference was statistically insignificant.
IFNA2	10914844	OBJECTIVE: To investigate estrogen receptor (ER) microsatellite allele frequencies in patients with rheumatoid arthritis (RA), and possible associations of ER microsatellites with osteoporosis and disease progression.
IFNA2	23946278	The prevalence of osteoporosis and parathyroid carcinomas was higher in Chinese PHPT patients with the R allele.
IFNA2	10693888	In contrast, as previously shown, the frequency of the C allele was lower in osteoporosis patients than in controls.
IFNA2	15807179	In conclusion, after 1 year on raloxifene, postmenopausal osteoporotic women on chronic hemodialysis, homozygous for the P or x (PP or xx) alleles of the ER, exhibited a better lumbar spine BMD response and decreased serum pyridinoline values when compared with heterozygous women (Pp or Xx), suggesting that ERalpha allelic variants may explain, at least in part, the different outcomes after treat…
IFNA2	11196702	The TNFA locus showed evidence for linkage to osteoporosis, with mean allele sharing of 0.478 (P = 0.30) in discordant pairs and 0.637 (P = 0.001) in concordant affected pairs.
IFNA2	17235662	CONCLUSIONS: These results indicate that some population differences in body composition may be due to population-specific allele frequencies, suggesting the utility of admixture mapping for identifying susceptibility genes for osteoporosis, sarcopenia, and obesity.
IFNA2	23875063	In the present study, four microsatellite markers viz., D12S1633, D12S1635, D12S347, and D12S96, that lie in the vicinity of the VDR gene on chromosome 12 were selected to assess the allele distribution pattern and diversity among three groups of individuals - normal, osteopenia and osteoporosis.
IFNA2	17885720	In our osteoporosis families, association was noted between lumbar spine BMD and alleles of a known functional tetranucleotide repeat (U4) in the PTHR1 promoter region (P = 0.042) and between two and three marker haplotypes of PTHR1 polymorphisms with lumbar spine, femoral neck, and total hip BMD (P = 0.021-0.047).
IFNA2	24550297	Here, we show that Cnot3 deficiency by deletion of a single allele induces osteoporosis.
IFNA2	11357939	Analysis of combined C-509-->T and T869-->C genotypes showed that L2-L4 bone mineral density decreases and the prevalence of osteoporosis increases with the number of T alleles.
IFNA2	23070909	The goal of the study was to investigate the possibility of an association between polymorphisms and single alleles of BsmI, ApaI, TaqI of the vitamin D receptor (VDR) gene with bone mineral density (BMD) and prevalence of vertebral/non-vertebral fractures in a group of postmenopausal Polish women with osteoporosis.
IFNA2	11508783	Absence of high-risk "s" allele associated with osteoporosis at the intronic SP1 binding-site of collagen Ialpha1 gene in Southern Chinese.
IFNA2	10207717	Osteoporosis is a complex disease, and allelic variation in many other candidate-genes including those that encode growth factors, cytokines, calciotropic hormones, and bone matrix proteins are likely to also play a role and warrant systematic investigation.
IFNA2	15256067	Mice homozygous for severely hypomorphic alleles of the Klotho gene exhibit a syndrome resembling human aging, including atherosclerosis, osteoporosis, emphysema, and infertility.
IFNA2	9613456	In 167 healthy women, participating in the osteoporosis prevention trial and being used as a control, we detected 121 Bb heterozygotes (72%), 26 homozygotes for the bb alleles (16%), and 20 homozygotes for the BB alleles (12%).
IFNA2	11375774	The marked premature osteoporosis observed in mice heterozygous for the disrupted Pthrp allele also points to a crucial role for the protein in the maintenance of the adult skeleton.
IFNA2	9783545	For each region, multivariable logistic regression analysis revealed that the frequency of the T allele was significantly higher in subjects with osteoporosis than in controls.
IFNA2	11085801	CONCLUSION: This study suggests that, in men with idiopathic osteoporosis, there is a high prevalence of the s allele and the SS: genotype that is unrelated to other parameters of bone metabolism.
IFNA2	18426824	These initial results appear to suggest that alleles exerting a beneficial effect in young women may subsequently contribute to phenotypes associated with osteoporosis risk in elderly women.
IFNA2	10329864	Analysis of the vitamin D receptor alleles may prove useful for selection of the optimum therapy for osteoporosis management.
IFNA2	24283361	In summary, this meta-analysis indicated that the G allele of the OPG A163G polymorphism might increase osteoporosis risk in Caucasians, whereas individuals with the C allele of the G1181C polymorphism had a decreased risk of osteoporosis, especially in Asians.
IFNA2	15113403	RESULTS: To estimate the accuracy and completeness of SNP public databases, we analyzed the allele frequencies of 41 SNPs in 10 candidate genes for obesity and/or osteoporosis in a large American-Caucasian sample (1,873 individuals from 405 nuclear families) by PCR-invader assay.
IFNA2	18036257	CONCLUSION: Through the resequencing of 81 osteoporosis candidate genes, 118 unknown SNPs with a minor allele frequency (MAF) > 0.05 were discovered in the Korean population.
IFNA2	20848459	With respect to genetics, carriage of the polymorphic allele for LTα252 A/G was associated with a higher risk of osteoporosis (P = 0.02).
IFNA2	20116372	It is likely that the allele exerts its influence on the bone in early adulthood leading to an increased risk of osteoporosis later in life.
IFNA2	24410296	CONCLUSION: Our findings showed that the G allele of the OPG A163G polymorphism may increase osteoporosis risk, whereas the C allele of the G1181C polymorphism may protect individuals from osteoporosis.
IFNA2	10611163	Allelic polymorphisms of the vitamin D receptor (VDR) gene are related to bone mineral density (BMD) in normal cohorts and those with primary osteoporosis.
IFNA2	23271131	In A163G, the G allele increased the risk for RA and for the development of osteoporosis.
IFNA2	11846326	By stepwise logistic regression analysis, it was found that the G2014A polymorphism was related to the presence of osteoporosis (odds ratio 2.7 per A allele, 95% CI 1.49-4.76) independently of body weight (odds ratio 0.93 per kg, 95% CI 0.89-0.96) and years since menopause (odds ratio 1.12 per year, 95% CI 1.08-1.19).
IFNA2	11157141	In pre-menopausal women, subjects who were homozygous for the T [corrected] allele had a 5-fold excess risk of having osteoporosis at the femoral neck compared with the other genotype groups.
IFNA2	16447061	Our data suggest, that the imbalance in B and b allele expression may be involved in the pathogenesis of RA-associated osteoporosis.
IFNA2	12162506	In 495 randomly selected women of the Geelong Osteoporosis Study (GOS), the A allele was associated with higher BMD at all sites tested.
IFNA2	21256255	The absence of the ALDH2*2 allele is found to adversely influence the risk of osteoporosis.
IFNA2	10693888	Although radiographic evaluation of osteophytes might not reflect the actual disease severity, the C allele, which protects against osteoporosis, may be a risk factor for genetic susceptibility to spinal osteophytosis.
IFNA2	11257727	Thus, allelic variation in the VDR cannot help define those at increased risk for osteoporosis and related fractures among such patients.
IFNA2	26379431	Patients with osteoporosis were more likely to carry the rs7975232 C allele compared to normal patients with BMD.
IFNA2	22328322	Significant increases in osteoporosis risk were observed with minor alleles of rs2077647 located in the first exon and rs2234693 located in the first intron of estrogen receptor α (ESRα).
IFNA2	22824048	For rs6993813 genotypic frequencies, the adjusted odds ratio for hip osteoporosis was 9.53 for individuals with T/T minor allele homozygotes, compared with that of participants with C/C wild-type homozygotes.
IFNA2	24621381	Women carrying the (TTTA)11 and/or (TTTA)12 alleles had significantly higher spinal BMD than women not carrying these alleles in the total study population as well as in the subgroup of women with osteoporosis (P = 0·042 and P = 0·006, respectively).
IFNA2	19506792	After adjusting for age, the IL6 -634G > C (rs1800796) allele showed association with osteoporosis (odds ratio (OR) for CC + CG = 2.51, p = 0.0047)), independent of statin use or smoking status.
IFNA2	23026509	Age increased osteoporosis risk; whereas body mass index (BMI), number of reproductive years, 25OHD level and the Cdx-2 polymorphism in the VDR gene (when allele A is present) were found to be protective.
IFNA2	7673427	These data indicate that the VDR alleles are associated with differences in the vitamin D endocrine system and may have important implications in relation to the pathophysiology of osteoporosis.
IFNA2	16999948	We propose the following approach to determine the possible association of SNPs with complex and multifactorial diseases like osteoporosis, in which hundreds of individuals should be analyzed: construct control and problem groups, make DNA pools, and calculate pooled allelic frequencies.
IFNA2	26345971	We identified 17 HLA-A alleles in patients with postmenopausal osteoporosis and 20 HLA-A alleles in control subjects.
IFNA2	15256976	Insulin-like growth factor I (IGF-I) gene microsatellite repeat polymorphism was found to be associated with osteoporosis in some studies, and collagen-Ialpha1 (COLIA1) Sp1 s allele was associated with lower bone mineral density in primary biliary cirrhosis.
IFNA2	20571774	UNLABELLED: One thousand seven hundred seventeen perimenopausal women from the Danish Osteoporosis Prevention Study were genotyped for the -1997G/T, -1663indelT and +1245G/T polymorphisms in the COLIA1 gen. We found that the -1997T allele and a haplotype containing it were associated with reduced bone mineral density (BMD) and increased bone turnover at menopause and after 10 years of follow-up.
IFNA2	26305103	We then ascertained their effect on 25OHD level in 2,347 participants from a population-based cohort, the Canadian Multicentre Osteoporosis Study, and tested the extent to which the 25OHD-decreasing alleles explained variation in 25OHD level.
IFNA2	10693888	Comparison among control, osteoporosis, and spinal osteophytosis groups also revealed that the C allele was more prevalent in subjects with osteophytosis than in controls, even after adjustment for BMD.
IFNA2	11196702	We tested 192 sib-pairs of adult Japanese women from 136 families for genetic linkage between osteoporosis and osteopenia phenotypes and allelic variants at the tumor necrosis factor-alpha (TNFA) locus, using a dinucleotide-repeat polymorphism located near the gene.
IFNA2	19371798	The T-allele of rs1230399 increased the risk of osteoporosis (OR=1.52, P=0.005).
IFNA2	20010502	CONCLUSIONS: The presence of T allele of TaqI polymorphism could predict the higher risk to develop osteoporosis in postmenopausal woman; consequently t allele could have protective effect.
IFNA2	10404018	The apolipoprotein E*4 (APOE) allele, associated with Alzheimer's disease, has also been associated with osteoporosis in hemodialysis patients.
IFNA2	24579967	Frequencies of A and 0 allele were 0.78 and 0.22 in osteoporosis and 0.77 and 0.23 in control group.
IFNA2	21115334	After adjustment for potential covariates, BsmI and TaqI polymorphisms were associated with the presence of osteoporosis (P<.05), while the presence of the minor A allele of Cdx-2 polymorphism was associated with a lower spine BMD (P=.025).
IFNA2	22461096	This consortium is now expected to play an important role in validation of risk alleles coming from Genome Wide Association Studies (GWAS) for osteoporosis, some of which have just been published.
IFNA2	12491092	Our results suggest that variant alleles of the five markers are absent or too rare to be useful genetic makers in Chinese, despite the fact that they have been commonly used as polymorphic markers in osteoporosis genetic research in other populations.
IFNA2	25773038	Genetics of osteoporosis and vitamin d receptor alleles.
IFNA2	25903400	A significant difference between women with osteoporosis and controls regarding allele and genotype distributions of AluI G/A (OR 2.37, 95 % CI 1.77-3.18 and p < 0.001 for A allele) and ERRα polymorphisms (for the two repeats allele OR 2.08, 95 % CI 1.09-4.00, and p = 0.02).
IFNA2	9299455	Allelic variations of the vitamin D receptor (VDR) gene have been associated with the risk of developing prostate cancer in men and osteoporosis in postmenopausal women.
IFNA2	16520888	In the osteoporosis group of patients, a significant difference was noted between the Lys/Lys group and the group comprising Glu/Lys and Glu/Glu groups (namely, the genotypes including Glu alleles).
IFNA2	17953702	The effect of confounders for osteoporosis on the association of G allele-osteoporosis was ruled out.
IFNA2	19506792	The lipoprotein receptor-related protein 5 (LRP5) gene showed association between C135242T C/T alleles and osteoporosis only in smokers, suggesting a role for environmental interaction.
IFNA2	24065669	We conclude that g.27676A>C in the OPG gene affects spine BMD and that the C allele is associated with increased risk for osteoporosis in Chinese postmenopausal women.
IFNA2	12050122	The common form of osteoporosis is generally considered to be a polygenic disorder arising from the interaction of common polymorphic alleles at quantitative trait loci, with multiple environmental factors.
IFNA2	24639846	RESULTS: We found that T allele of rs35767 had higher increased risk of osteoporosis (OR=1.34, 95%CI=1.0-1.81).
IFNA2	26379431	Patients without the haplotype GAT allele showed a significantly lower T-score at the femoral neck and an increased risk of osteoporosis (odds ratio [OR]= 2.78, 95% confidence interval [CI]= 1.20-6.48, P=0.018) compared with carriers in the dominant model.
IFNA2	23460508	The G allele in Lys109Arg and Gln223Arg was associated with increased risk of osteoporosis and with differences in serum leptin, soluble leptin receptor, IL-1, IL-6, and TNF levels compared with the wild-type A allele (p < 0.05).
IFNA2	9059562	In view of the increasing importance of osteoporosis in men, we have now investigated the association between common allelic variations in the vitamin D receptor gene, calcium absorption and bone density in men.
IFNA2	16675885	Major efforts are currently underway to identify the specific genes and their allelic variations that contribute to the heritable component to osteoporosis.
IFNA2	24678593	Additionally, 2.01-fold higher odds for osteoporosis of the lumbar spine were found in the CC haplotype homozygotes compared to women not carrying the haplotype CC allele.
IFNA2	24278256	We investigated 32 SNPs with minor allele frequencies ≥0.05 between 20 kb upstream and 20 kb downstream (40 kb window) of rs6532023, mapping in the 4q22.1 region, which was reported to be significantly associated with osteoporosis in previous studies.
IFNA2	26345971	Furthermore, we found that the frequency of the HLA-A* 02:07 allele was significantly higher in patients with postmenopausal osteoporosis than in control subjects (P = 0.023), and the relative risk was 4.065 (95% confidence interval = 1.109-14.893).
IFNA2	7719988	Genetics of osteoporosis and vitamin D receptor alleles.
IFNA2	19429913	Gel shift assays showed that the region surrounding the -1663IndelT polymorphism recognized a complex of proteins essential for osteoblast differentiation and function including Nmp4 and Osterix, and the osteoporosis-associated -1663delT allele had increased binding affinity for this complex.
IFNA2	24410296	For the OPG A163G polymorphism, the combined results showed that the G allele of the A163G polymorphism may be associated with an increased risk of osteoporosis.
IFNA2	23138503	Subject carrying the variant allele of the Tyr315Cys polymorphism showed a 2.68-fold (95 % CI, 1.20-6.02) higher risk of osteoporosis compared with wild-type subject.
IFNA2	12841538	Because the Apo E 4 allele was associated with osteoporosis in previous studies, the probands were dichotomized by the presence or absence of Apo E 4 allele.
IFNA2	19506792	On stratification for smoking, association with LRP5 C135242T (rs545382) and osteoporosis emerged (OR 2.8 in smokers for CT alleles, p = 0.03)), suggestive of potential environmental interaction.
IFNA2	14691541	Linkage analysis in a large number of extended osteoporosis families in Iceland, using a phenotype that combines osteoporotic fractures and BMD measurements, showed linkage to Chromosome 20p12.3 (multipoint allele-sharing LOD, 5.10; p value, 6.3 x 10(-7)), results that are statistically significant after adjusting for the number of phenotypes tested and the genome-wide search.
IFNA2	13678774	The TGF beta C allele was associated with an increase in osteoporosis [T score < or =-2.5 SD; odds ratio (OR) 2.07; 95% confidence interval (CI) 1.19-3.60] and prevalent fracture (1.37; 95% CI 1.06-1.75).
IFNA2	19143970	METHODS: Alleles S and s, detected by presence of a G or T nucleotide, respectively in a regulatory site of the COLIA1 gene were investigated in 37 beta-thalassemia major patients with osteoporosis and 92 controls without osteoporosis or osteopenia using polymerase chain reaction-restriction fragment length polymorphism.
IFNA2	24783428	Also, mutated 8993T allele was overrepresented in the group with osteoporosis (6.7 vs. 2.7%, OR=2.52, p=0.04).
IFNA2	12219967	CONCLUSION: The very low frequency of the collagen Sp I s allele and higher frequency of the VDR T allele in blacks may be associated with the lower incidence of osteoporosis in this ethnic group.
IFNA2	16777502	Subjects with the C allele of T-1213C were associated with higher risks of osteoporosis and BMD T scores < or = -2.5 (odds ratios: 2.2 at spine and 3.5 at femoral neck for women; 3.5 at lumbar spine for men).
IFNA2	23242660	In this study were determined the allelic and genotypic frequencies of four polymorphic markers (C/T rs3736228, G/A rs4988321, T/C rs627174 and T/C rs901824) in the low-density lipoprotein receptor-related protein 5 gene (LRP5) and their association with osteoporosis in 100 pos-menopausal osteoporotic Mexican women and their controls, using real time-PCR and TaqMan probes.
IFNA2	24783428	CONCLUSIONS: Results of our study suggest an important role of mutated 8993T allele of 8993C>T TLR4 polymorphisms in the etiology of postmenopausal osteoporosis.
IFNA2	8841196	The unfavourable Ss and ss genotypes were over-represented in patients with severe osteoporosis and vertebral fractures (54%), as compared with controls (27%), equivalent to a relative risk of 2.97 (95% confidence interval 1.63-9.56) for vertebral fracture in individuals who carry the 's' allele.
IFNA2	24917365	We found that 40 HLA-B alleles in postmenopausal osteoporosis patients and control subjects, respectively.
IFNA2	9783545	These results suggest that the T/C polymorphism of the TGF-beta1 gene is one of the genetic determinants of bone mass and that the T allele is an independent risk factor for the genetic susceptibility to osteoporosis in postmenopausal Japanese women.
IFNA2	22866266	The Glu727 Allele of Thyroid Stimulating Hormone Receptor Gene is Associated with Osteoporosis.
IFNA2	8530619	To evaluate whether common allelic variants in the gene encoding the vitamin D receptor (VDR) were useful in predicting differences in bone mineral density (BMD) and bone turnover rate in Koreans, we analyzed the restriction pattern of the polymerase chain reaction product of the VDR gene with the Bsm1 enzyme and serum osteocalcin in patients with osteoporosis.
IFNA2	11259341	Understanding the mechanisms underlying these allelic differences in relation to diet and lifestyle factors as well as response to therapy could aid selection of optimal therapy for osteoporosis prevention and treatment.
IFNA2	23635032	Interestingly, osteoporosis was found more frequently in patients carrying NOD2 variant alleles (p=0.033), especially in pediatric-onset CD patients with homozygous NOD2 variants (p=0.037).
IFNA2	24283361	For A163G (rs3102735), the combined results showed that the G allele of the A163G polymorphism may be associated with an increased risk of osteoporosis.
IFNA2	12841538	Recently some studies have examined whether the Apo E 4 allele might play a role in the pathophysiology of postmenopausal osteoporosis.
IFNA2	23460508	We found a higher frequency of the A allele for LEP at -2548 in patients with osteoporosis compared with the control group.
IFNA2	7502699	Vitamin D receptor gene alleles and osteoporosis: a contrasting view.
IFNA2	15647972	However, the presence of the A-C haplotype allele based on the A2014 and C3768 alleles was significantly related to the risk of osteoporosis independently of age, body weight, the G2014A and C3768A SNPs (odds ratio 2.36, 95% CI 1.42-3.91).
IFNA2	20650818	The +1169A allele of the A/T single nucleotide polymorphism (SNP; rs2665802), located within intron 4 of the human growth hormone 1 ( GH1 ) gene, has been associated with reduced levels of circulating GH and insulin-like growth factor 1, a reduced risk of colorectal cancer and a predisposition to osteoporosis.
IFNA2	17498269	HLA alleles as predisposal factors for postmenopausal osteoporosis in a Greek population.
IFNA2	26568273	Endochondral ossification pathway genes and postmenopausal osteoporosis: Association and specific allele related serum bone sialoprotein levels in Han Chinese.
IFNA2	11085801	RESULTS: Patients with idiopathic osteoporosis had a higher frequency of the s allele than men in the control group (29 vs 11%, P: = 0.003) and a higher frequency of the SS: genotype (patients, 48% SS, 46% SS:, 6% ss; controls, 80% SS, 18% SS:, 2% ss; P: = 0.003).
IFNA2	23979900	This result suggests a possible susceptibility effect of the C allele of the FokI SNP for the development of osteoporosis in postmenopausal Mexican-Mestizo women.
IFNA2	18084690	METHODS: Single strand conformation polymorphism and allele-specific PCR analysis were used to assess alleles at osteonectin cDNA bases 1046, 1599, and 1970, using genomic DNA from middle-aged Caucasian men with idiopathic, low turnover osteoporosis (n = 56) and matched controls (n = 59).
IFNA2	25177945	Our results indicated that the A allele was an increased risk factor for primary osteoporosis and the g.19074G>A genetic variant of the OPG gene was associated with BMD and primary osteoporosis in Chinese postmenopausal women.
IFNA2	23896482	This article provides evidence in support of differential allele frequency distributions that underlie the higher rates of nondiabetic kidney disease in the focal segmental glomerulosclerosis spectrum of disease and lower rates of coronary artery calcified atherosclerotic plaque and osteoporosis in populations of African ancestry.
IFNA2	21236712	Our data suggest that WNK4 polymorphism rs56116165 is a rare allelic variant in a candidate gene with a biological function in renal calcium homeostasis that may contribute to a genetic predisposition to osteoporosis.
IFNA2	24522475	There was no statistically significant difference in genotypes (P = 0.922) or allele frequency (P = 0.654) between the Xinjiang Han postmenopausal osteoporosis patients and the controls.
IFNA2	11740340	In addition, analysis of combined genotypes for both the C-509-->T and T869-->C polymorphisms revealed that bone mineral density decreases and the susceptibility to osteoporosis increases with the number of T alleles.
IFNA2	24213141	The minor allele (T) of rs1799983 exerts a statistically significant risk for osteoporosis both in dominant [odds ratio (OR) 3.71, 95 % confidence interval (CI) 2.12-6.49, P < 0.001] and recessive mode (OR 5.75, 95 % CI 1.24-26.69, P = 0.036) after Bonferroni correction.
IFNA2	24818003	Allelic variation in the vitamin D receptor was the first non-structural gene to be associated with osteoporosis, and together with the effects of the vitamin D system on bone homeostasis, suggested that this vitamin might have a strong role in bone health.
IFNA2	24783428	Higher frequency of heterozygous 8993CT genotype (13.3% vs. 5.3%, OR=2.73, p=0.003) and mutated 8993T allele (6.7 vs. 2.7%, OR=2.67, p=0.004) was observed in the group with osteoporosis as compared to women with osteopenia and with correct t-score.
IFNA2	17376011	Given the biological significance of signalling through steroid hormone receptors, bone biology and calcium homeostasis, alleles of steroid hormone receptor genes have been postulated to contribute to the well-documented genetic predisposition to osteoporosis; and in different studies, these alleles have been associated with variation in bone mass and fracture risk.
IFNA2	23875063	Statistically significant linkage disequilibrium was detected for the allele - 22 of locus D12S96 with osteoporosis.
IFNA2	9751364	PURPOSE: Reports in the osteoporosis literature demonstrating the increased activity of specific alleles of the vitamin D receptor and epidemiological data linking vitamin D levels with prostate cancer have stimulated research into possible associations between vitamin D receptor genotype and the development of prostate cancer.
IFNA2	24283361	For G1181C (rs2073618), however, we found that individuals with the C allele of the G1181C polymorphism had a decreased risk of osteoporosis, especially in Asian and postmenopausal woman subgroups.
IFNA2	19386104	Moreover, ESR1 rs2234693 genotypes correlated with family history of osteoporosis (FHO) and hip fracture (FHF) (P < 0.01), while ESR2 AA-AC genotypes were strongly associated with FHF (OR 2.387, 95% CI 1.432-3.977; P < 0.001).When clustered by age, 20-30 yrs old subjects, having at least one ESR1 rs2234693 C allele presented lower LS- (P = 0.008) and TH-BMD (P = 0.047) than TT genotypes.
IFNA2	19650200	The frequencies of eNOS 27 bp-VNTR a allele were 5.33% in the osteoporosis group, 10.24% in the osteopenia group, and 16.13% in the normal group (P<0.05, odds ratio (OR)=0.29, 95% confidence interval (CI)=0.11-0.77), suggesting that a/a genotype and a allele might have protective effects on osteoporosis.
IFNA2	19373426	INTRODUCTION: This study aims to explore the allelic variations and expression of Wnt pathway genes in patients with osteoporosis and osteoarthritis.
IFNA2	18038108	Allele *10 was associated with a lower risk of osteoporosis (OR 0.39, 95% CI 0.25-0.64; p < 0.0005), as was allele *11 (odds ratio 0.09, 95% CI 0.01-0.67; p < 0.007).
IFNA2	12633791	A case-control study involving 125 osteoporosis patients and 92 healthy controls revealed a significant association between the presence of a 16Ser GnRH allele and affected status (chi(2) = 4.74, P = 0.041).
IFNA2	24615112	Our data indicated that the A allele of the g.27563G>A genetic polymorphism in OPG could be associated with lower BMD values in the Chinese postmenopausal women evaluated, and that it might be an increased risk factor for osteoporosis.
IFNA2	19506792	SUMMARY: A cohort of postmenopausal osteoporotic females and controls with normal bone mineral density, the interleukin 6 (IL6) -634G > C (rs1800796) C allele of the promoter region showed association with osteoporosis.
IFNA2	21269451	METHODS: We developed Cumulative Meta-Analysis of GAS-OSTEOporosis (CUMAGAS-OSTEOporosis), a web-based information system that allows the retrieval, analysis and meta-analysis (for allele contrast, recessive, dominant, additive and codominant models) of data from GASs on osteoporosis with the capability of update.
IL17RC	23731710	CONCLUSIONS: The expression pattern of IL17RC, COL1A1, and ESR1 can be useful in osteoporosis detection, which may help in identifying those populations at high risk for osteoporosis, and in directing treatment of osteoporosis.
DMTN	26078704	Therefore, the present study aimed to explore the function of DMT1 in the pathological process of diabetic osteoporosis.
DMTN	11276017	The importance of this rather high prevalence of dmtDNA in the bone of the elderly is discussed in terms of possible involvement of increased production of oxygen-derived free radicals and oxidative stress, and its possible role in the accelerated bone loss leading to osteoporosis.
DMTN	26078704	These findings indicate that DMT1 expression was enhanced in the bone tissue of type 2 diabetic rats, and plays an important role in the pathological process of diabetic osteoporosis.
DMTN	26078704	Moreover, DMT1 may be a potential therapeutic target for diabetic osteoporosis.
ROR2	22057548	SUMMARY: There is a paucity of studies investigating association between ROR2 gene variants and osteoporosis and osteoarthritis-related phenotypes.
ROR2	22057548	INTRODUCTION: Despite the importance of the ROR-2 in skeletal physiology, there is a paucity of studies investigating the potential association of ROR2 gene variants with phenotypes relevant to osteoporosis and osteoarthritis.
HIST1H1E	3951320	Ipriflavone, 7-isopropoxy-3-phenyl-4H-1-benzopyran-4-one, was administered orally for 12 weeks to male rats with prednisolone-induced osteoporosis.
ISM1	23436077	INTRODUCTION: It is well established that ISM can trigger osteopenia or osteoporosis.
ISM1	25542754	Subjects with indolent systemic mastocytosis (ISM) have an increased risk for osteoporosis.
ISM1	26637707	Therapy of SM has to be adjusted to the individual patient and the SM category: in those with ISM and SSM, the goal is to control mediator secretion and/or mediator effects, to keep concomitant allergies under control, and to counteract osteoporosis, whereas in advanced SM (ASM, MCL, and SM-AHNMD) anti-neoplastic drugs are prescribed to suppress MC expansion and/or to keep AHNMD cells under contr…
ISM1	24985401	Patients receiving treatment for osteoporosis before ISM diagnosis or with missing bone data were excluded from FFx risk assessment.
ISM1	25542754	These findings revealed important pathophysiological information about ISM-associated osteoporosis and may limit the use of trabecular bone microstructure analysis in this clinical setting.
ISM1	21782049	CONCLUSIONS: Vertebral osteoporosis and fractures are frequent in patients with ISM.
ISM1	12218373	The most consistent finding was that of IL-6 elevations in 7/7 patients (3 females/4 males) who reported symptoms of osteoporosis and/or bone pain (1 SuSM, 3 ISM, 3 ASM) in the absence of any coexisting condition involving bone pathology.
ISM1	25694360	Bone involvement, mainly osteoporosis but also osteosclerosis, is frequent in patients with indolent systemic mastocytosis (ISM).
ISM1	23587333	BACKGROUND: Clinical manifestations of indolent systemic mastocytosis (ISM) comprise mediator-related symptoms, anaphylaxis, and osteoporosis.
ISM1	22229787	CONCLUSIONS: This first publication about prevalence of fractures and osteoporosis in patients with ISM shows that the risk of osteoporotic fractures is high, especially in men.
ISM1	24985401	BACKGROUND: Fragility fractures (FFxs) and osteoporosis occur frequently in patients with indolent systemic mastocytosis (ISM), even before 50 years of age.
NPY6R	19350555	The promising effects of the inhibitors PP2 and PAO on osteoclast function suggest a therapeutic approach for patients with bone metastases and osteoporosis as an alternative to bisphosphonates.
SMUG1	12195540	FDG-PET findings of vertebral compression fractures in osteoporosis: preliminary results.
SMUG1	12195540	Our preliminary results indicate that acute vertebral fractures that originated from osteoporosis or preclinical osteoporosis tend to have no pathologically increased FDG uptake.
SMUG1	11914890	False-positive 67Ga citrate images ( n=5: 2 spondylodiscitis, 1 aortitis, 1 pleuritis, 1 pulmonary tuberculosis) and 99mTc-MDP SPET ( n=4: 1 osteoporosis, 2 spondylodiscitis, 1 fracture) were equally well detected by FDG hybrid PET and MRI.
SMUG1	22965489	Eighteen weeks after osteoporosis induction and 6 weeks following femoral surgery, dPET-CT studies scan were performed with (18)F-FDG and (18)F-fluoride.
SMUG1	12195540	The aim of this study was to evaluate FDG-PET findings in patients with osteoporosis or preclinical osteoporosis and acute vertebral compression fractures in order to determine whether FDG-PET has a value for distinction of pathological from osteoporotic vertebral fractures.
SMUG1	23526138	Evaluation of bone remodeling with (18)F-fluoride and correlation with the glucose metabolism measured by (18)F-FDG in lumbar spine with time in an experimental nude rat model with osteoporosis using dynamic PET-CT.
XIRP1	26166370	Bu-Shen-Ning-Xin decoction suppresses osteoclastogenesis via increasing dehydroepiandrosterone to prevent postmenopausal osteoporosis.
XIRP1	26357466	INTRODUCTION: Bu-Shen-Ning-Xin Decoction (BSNXD), a traditional Chinese medicinal composition, has been used as a remedy for postmenopausal osteoporosis, but its effects on bone metabolism and the uterus have not been reported.
XIRP1	26229438	INTRODUCTION: Bu-Shen-Ning-Xin decoction (BSNXD) is a traditional Chinese medicinal composition that has been used as a remedy for postmenopausal osteoporosis, but the mechanisms affecting bone metabolism are not fully understood.
XIRP1	26166370	Bu-Shen-Ning-Xin decoction (BSNXD), a traditional Chinese medicine, has been used to prevent and treat age-related diseases such as postmenopausal osteoporosis (PMO) for decades.
COL15A1	19781675	PTN, CXCL2, COL15A1, IBSP, AOX1, MT1G, GSR and TXNRD1 are candidate genes for further studies in the assessment of the genetic susceptibility to osteoporosis.
TRPV6	17850211	These results indicate that the genes for TRPV5 and TRPV6 are differentially regulated in human diseases associated with disturbed Ca2+ balance such as hypercalciuria, osteoporosis, and vitamin D-resistant rickets.
TRPV6	19490920	SIGNIFICANCE: These results suggest that the expressions of TRPV6 and CaBP-9k in the duodenum appear to be a major regulatory target for glucocorticoids (GCs), and may be involved in the negative regulation of calcium absorption in GC-induced osteoporosis (GIO).
GAN	10328560	We previously isolated berberine from aqueous extracts of tsu-kan-gan, a Kampo formula used for the treatment of osteoporosis.
GAN	26647856	The current study demonstrated that gallium nitrate (GaN) is able to counteract bone loss in an experimental model of established osteoporosis.
GAN	24026106	In this study, we evaluated the effects of tongue coating microbiome on changes in the tongue texture and coating in patients with post-menopausal osteoporosis (PMO) of Gan‑shen deficiency syndrome type.
GAN	24026106	Tongue coating microbiome regulates the changes in tongue texture and coating in patients with post-menopausal osteoporosis of Gan-shen deficiency syndrome type.
GAN	15863895	We evaluated the effects of the traditional Chinese medicines, Hachimi-jio-gan, Juzen-taiho-to and Unkei-to, on bone loss in murine model of senile osteoporosis (SAMP6).
GAN	22543171	ETHNOPHARMACOLOGICAL RELEVANCE: Hachimi-jio-gan is one of the most common recipes in traditional Chinese, Japanese and Korean medicines and has been used for preventing and treating various diseases associated with aging, including osteoporosis.
GAN	24354584	Various plants like Achyranthes bidentata, Davallia formosana, polygonatum sibiricum, Cibotium barometz, Er-Zhi-Wan, Curculigo orchioides and a combined treatment of Hachimi-jio-gan (Ba-Wei-Di-Huang-Wan) with alendronate proved active in preventing post-menopausal osteoporosis.
APOE	20663622	CONCLUSIONS: The present study exposed a susceptibility haplotype CGTC, within APOE gene, which was found to be associated with BMD and risk of osteopenia and osteoporosis in postmenopausal females of India.
APOE	25038521	In this regard, the GHRH-GH-IGF-1/Insulin, TOR-S6K1,NAD(+)-Sirtuin, P53, Klotho and APOE pathways have been linked to processes associated with age-related diseases, including cancer, cardiovascular disease, diabetes, osteoporosis, and neurodegenerative diseases, all of which directly influence health in aging, and represent key targets in anti-aging therapy.
APOE	19506792	METHODS: Genotyping of 14 single-nucleotide polymorphisms (SNPs) corresponding to vitamin D receptor gene, estrogen receptor 1, collagen type 1 alpha 1, IL6, transcription growth factor beta, apolipoprotein E, and LRP5 genes was performed in cases (n = 309) with osteoporosis and controls (n = 293) with normal bone mineral density drawn from a homogeneous Caucasian population.
APOE	15312249	We did not observe an association between the ApoE polymorphism and osteoporosis in this study, which is thus far the largest study on ApoE and osteoporosis.
APOE	20340021	SNP-SNP interactions within APOE gene influence plasma lipids in postmenopausal osteoporosis.
APOE	20057999	METHODS: Twenty-seven females (39.6 +/- 0.41 years, mean +/- standard error), without osteopenia or osteoporosis and without calcium supplementation, were randomly assigned either to a linear periodization group (LPG, n = 14) or to an undulating periodization group (UPG, n = 13).
APOE	15549644	Apolipoprotein E (APOE) has been considered as a candidate gene for osteoporosis because of its influence on osteoblast uptake of lipoprotein-borne vitamin K. Using the quantitative transmission disequilibrium test QTDT, we examined linkage and/or association of APOE and BMD at the lumbar spine and the total hip in a sample of 387 Caucasian nuclear families with 715 parents and 953 children.
APOE	26366785	Lower body mass index, nonwhite race, longer tenofovir exposure, older age, being unemployed or retired, and lower apolipoprotein E were independently associated with baseline osteoporosis.
APOE	20533025	INTRODUCTION: APOE has been studied for its potential role in osteoporosis risk.
APOE	15312249	UNLABELLED: To study the association between the ApoE gene polymorphism and osteoporosis, we performed an association study in 5,857 subjects from the Rotterdam Study.
APOE	15838630	Apolipoprotein E (Apo E) polymorphism has been implicated in many chronic diseases, including Alzheimer disease and osteoporosis.
APOE	22178106	OBJECTIVES: We analyzed the correlation between osteoporosis and carotid atherosclerosis (CA) by exploring the effects of ApoE gene polymorphisms on bone mineral density (BMD) of the lumbar spine and CA.
APOE	15207892	OBJECTIVES: A number of studies have shown a positive relation between ApoE gene and osteoporosis or fracture risk but this finding has not been uniform in all populations studied.
APOE	11420784	Osteoporosis and apolipoprotein E genotype in older adults: the Rancho Bernardo study.
APOE	15528376	Any similar reduction of apoE activity in humans may contribute to the pathogenesis of a wide range of chronic diseases including atherosclerosis, dementia, and osteoporosis.
APOE	20546958	INTRODUCTION: Apolipoprotein E (ApoE) is implicated in the pathogenesis of osteoporosis.
APOE	20663622	The influence of APOE gene polymorphisms on BMD as genetic mediators of osteoporosis risk needs to be explored in Indian postmenopausal females where this disease is rising rampantly.
APOE	20663622	BACKGROUND: The association of apolipoprotein E (APOE) genotypes with bone mineral density (BMD) and risk of osteoporosis have remained unclear.
APOE	11420784	Recent studies reported an association between apolipoprotein E (ApoE) 4 and osteoporosis.
APOE	12841538	Recently some studies have examined whether the Apo E 4 allele might play a role in the pathophysiology of postmenopausal osteoporosis.
APOE	20595654	Apolipoprotein E-deficient mice fed with Western high-fat diet for 3 months presented atherosclerotic calcification (Oil red and Alizarin red staining) and osteoporosis (microcomputed tomographic analysis) after ovariectomy and increased expression of RANKL, RANK, and osteopontin in atherosclerotic lesion, as detected by in situ hybridization.
APOE	20663622	A susceptible haplotype within APOE gene influences BMD and intensifies the osteoporosis risk in postmenopausal women of Northwest India.
APOE	10404018	The apolipoprotein E*4 (APOE) allele, associated with Alzheimer's disease, has also been associated with osteoporosis in hemodialysis patients.
APOE	12841538	Because the Apo E 4 allele was associated with osteoporosis in previous studies, the probands were dichotomized by the presence or absence of Apo E 4 allele.
APOE	15018490	Most work in this area of osteoporosis research has focused on the candidate gene approach, which has identified several candidate genes for osteoporosis, including genes encoding the vitamin D receptor (VDR), oestrogen receptors (alpha and beta), apolipoprotein E, collagen type I alpha 1 and methylenetetrahydrofolate reductase, amongst many others.
APOE	11874234	The uptake of lipoprotein-borne phylloquinone (vitamin K1) by osteoblasts and osteoblast-like cells: role of heparan sulfate proteoglycans and apolipoprotein E. Vitamin K is essential for the gamma-carboxylation of Gla-containing bone proteins such as osteocalcin and a suboptimal vitamin K status has been linked to osteoporosis but nothing is known of how the lipoprotein-borne vitamin accesses th…
ATP11A	16207901	Such compounds have been mooted as the basis of a potential drug treatment for osteoporosis, since the V-ATPase is involved in the osteoclast-mediated bone resorption that underlies this common condition.
ATP11A	17872954	The osteoclast variant of the vacuolar H(+)-ATPase (V-ATPase) is a potential therapeutic target for combating the excessive bone resorption that is involved in osteoporosis.
SRI	19630109	Osteoporosis in adult Sri Lankan inflammatory bowel disease patients.
SRI	15577125	Osteoporosis in Sri Lanka.
SRI	25548540	OBJECTIVES: Aim of this study is to determine the knowledge, beliefs and practices regarding osteoporosis among young females entering medical schools in Sri Lanka.
SRI	21199475	Prevalence and predictors of osteoporosis in an urban Sri Lankan population.
SRI	23975235	Age-specific ITs were estimated based on the Sri Lankan FRAX model using the method followed by the National Osteoporosis Guideline Group in the UK.
SRI	19328732	Osteoporosis and cardiovascular risk among premenopausal women in Sri Lanka.
SRI	16679916	The objectives of the study are to describe changes in BMD in children with SCN treated with granulocyte colony-stimulating factor and evaluate the response to treatment with bisphosphonates in those who had osteoporosis.
SRI	16679916	Osteoporosis is an important comorbidity in SCN patients probably due to increased bone resorption.
SRI	16679916	A prospective open-label study was performed evaluating BMD and metabolism in 9 Chilean patients with SCN, administrating bisphosphonates in those with osteoporosis.
SRI	21199475	AIM: To determine the prevalence of osteoporosis in both women and men and to determine the association between osteoporosis and selected risk factors among a sample of urban Sri Lankan adults.
SRI	15577125	In Sri Lanka the median age, which was 25 in year 1991, is expected to rise to 45 by the year 2041 and half of the population will be over 45 years and vulnerable to osteoporosis.
SRI	25548540	A descriptive study of knowledge, beliefs and practices regarding osteoporosis among female medical school entrants in Sri Lanka.
SRI	19630109	AIM: To determine if inflammatory bowel disease (IBD) is a risk factor for osteoporosis in adult Sri Lankans.
HDAC5	19920351	A novel microRNA targeting HDAC5 regulates osteoblast differentiation in mice and contributes to primary osteoporosis in humans.
HLA-E	20554715	BACKGROUND: In Europeans and populations of European origin, several osteoporosis susceptibility genes, including ZBTB40, RANK, RANKL, OPG, MHC, and ESR1, were recently identified.
HLA-E	23133532	In conclusion, variation in inflammatory genes CIITA, CLEC-16A and INFG appear to contribute to bone phenotypes in elderly women and suggest a role for low-grade inflammation and MHC class II expression for osteoporosis pathogenesis.
HLA-E	21646926	CONCLUSIONS: Our study indicates that osteoporosis susceptibility SNPs, such as ESR1 (rs1038304, rs4870044, rs6929137), MHC (rs3130340), low-density lipoprotein receptor-related protein 4 (rs2306033), and jagged1 (rs2273061), might independently and/or in an interactive manner influence ANM and maximal height.
ALDH2	16520888	RESULTS: A significant association was found between the ALDH2Glu478Lys gene polymorphisms and osteoporosis.
ALDH2	22508505	Here we show that a dominant-negative form of aldehyde dehydrogenase 2 (ALDH2) protein, ALDH2*2, which is produced by a single nucleotide polymorphism (rs671), promotes osteoporosis due to impaired osteoblastogenesis.
ALDH2	23313283	The inactive ALDH2 phenotype is prevalent in East Asians, and an association between this ALDH2 polymorphism and osteoporosis has been reported.
ALDH2	24382882	Recent studies suggest that ALDH2 dysfunction is also associated with Fanconi anemia, pain, osteoporosis, and the process of aging.
ALDH2	22508505	Aldehyde-stress resulting from Aldh2 mutation promotes osteoporosis due to impaired osteoblastogenesis.
ALDH2	22508505	Aldh2 plays a role in alcohol-detoxification by acetaldehyde-detoxification; however, transgenic mice expressing Aldh2*2 (Aldh2*2 Tg) exhibited severe osteoporosis with increased levels of blood acetaldehyde without alcohol consumption, indicating that Aldh2 regulates physiological bone homeostasis.
BCL2L10	18260172	Efficacy and tolerability of intravenous ibandronate injections in postmenopausal osteoporosis: 2-year results from the DIVA study.
BCL2L10	19909829	Effects of intermittent intravenous ibandronate injections on bone quality and micro-architecture in women with postmenopausal osteoporosis: the DIVA study.
BCL2L10	19803906	The oral iBandronate Osteoporosis vertebral fracture trial in North America and Europe (BONE), Monthly Oral iBandronate In LadiEs (MOBILE), and Dosing IntraVenous Administration (DIVA) trials demonstrated that long-term daily and intermittent administration of ibandronate was efficacious for increasing bone mineral density and reducing markers of bone turnover.
BCL2L10	18260172	The Dosing IntraVenous Administration (DIVA) study was designed to identify the optimal ibandronate IV injection schedule for the treatment of postmenopausal osteoporosis by comparing the efficacy and tolerability of 2- and 3-monthly injections with the previously evaluated daily oral ibandronate regimen.
TAF7L	15984422	In summary, the new vivaCT40 can monitor the effects of known agents and diseases such as osteoporosis, inflammatory arthritis, and tumor invasion on 3-D trabecular microarchitecture accurately, repeatedly, reliably, and quickly in anesthetized rats and mice.
TAF7L	15984422	Postmenopausal osteoporosis: in 8-month-old ovariectomized (OVX) rats, the vivaCT40 was capable of picking up the decrease in trabecular bone volume and trabecular thinning as well as the decrease in the number of trabecular elements as a function of time.
AIRE	16649965	CONCLUSIONS: Despite the complex endocrine problems, the overall prevalence of symptomatic osteoporosis is low in adults treated for APECED.
FAS	25428397	Results of our study suggested that careful titration of MSC was response to L-A and up-regulated FasL pathways mediating differentiation of ERK and GSK-3β-catenin biological systems under disease state in vivo, restore the impaired function, is one of the ways of L-A relieve or treatment osteoporosis.
FAS	26417573	A potential osteoporosis target in the FAS ligand/FAS pathway of osteoblast to osteoclast signaling.
FAS	10482306	Our results suggest that IL-1beta and TNF-alpha regulate osteoblast cell number by up-regulating the Fas-mediated apoptosis of osteoblasts, one of the putative mechanisms inducing periarticular osteoporosis in patients with RA.
FAS	20084056	In conclusion, the Fas receptor has an important role in the pathogenesis of postmenopausal osteoporosis by mediating apoptosis and inhibiting differentiation of osteoblast lineage cells.
FAS	15207753	Recent data from animal experiments suggest that cytokines, in particular Fas ligand (FasL), contribute to postmenopausal osteoporosis.
FAS	15930486	Inhibition of osteoporosis in autoimmune disease prone MRL/Mpj-Fas(lpr) mice by N-3 fatty acids.
FAS	23598406	These data show for the first time that the FasL/Fas system can have a role in BM-MSC biology via regulation of both proliferation and adipogenesis, and may have clinical relevance because circulating Fas/FasL levels decline with age and several age-related conditions, including osteoporosis, are characterized by adipocyte accumulation in BM.
FAS	22591899	The aim of this systematic review was to determine if randomized controlled trials (RCTs) support a positive effect of n-3 FAs on osteoporosis.
FAS	10482306	Our recent work demonstrated functional Fas expression on human osteoblasts, and the histologic examination of the periarticular osteoporosis region in patients with rheumatoid arthritis (RA) showed apoptosis in osteoblasts.
KIFAP3	18457343	In linear discriminant analysis, the GDS score cutoff that best predicted osteoporosis was >or=19.
KIFAP3	20139991	As gut-derived serotonin (GDS) inhibits bone formation, we asked whether hampering its biosynthesis could treat osteoporosis through an anabolic mechanism (that is, by increasing bone formation).
KIFAP3	24557459	Independent predictors of HRQoL with greatest decrements in EQ-5D index and visual analog scores (VAS) were unemployment, selfreported depression, arthritis and osteoporosis and ADL limitations for activities such as "unable to shower", "unable to do housework" and elderly with depressive symptoms (GDS score≥5).
KIFAP3	20139991	These results provide a proof of principle that inhibiting GDS biosynthesis could become a new anabolic treatment for osteoporosis.
KIFAP3	22461074	METHODS: A population-based prospective cohort study of 2,464 community-dwelling men, aged 68 and older, enrolled in the Osteoporosis in Men Sleep Ancillary Study had depressive symptoms assessed by the Geriatric Depression Scale (GDS).
MRAP	20697764	Logistic regression analyses were used to investigate relations between the following variables: age, gender, disease duration, diagnosis, HLA-B27, erythrocyte sedimentation rate (ESR), C-reactive protein (CRP), Bath Ankylosing Spondylitis Disease Activity Index (BASDAI), Bath Ankylosing Spondylitis Functional Index (BASFI), Bath Ankylosing Spondylitis Metrology Index (BASMI), extra-spinal manife…
MRAP	8474070	Bone mineral density measurements in 5 family members and the proband, revealed more severe osteoporosis in those with positive HLA-B27.
MRAP	17526927	CONCLUSION: The HLA-B27 transgenic rats develop bone fragility similar to that seen in spondyloarthropathy and may be an important model for the study of osteoporosis in spondyloarthropathy.
MRAP	16680392	We present a 53-year-old man with synovitis-acne-palmoplantar pustulosis-hyperosteosis-osteitis (SAPHO) syndrome who is HLA-B27 positive with a history of uveitis and complicated by proteinuria and osteoporosis.
MRAP	24771481	These results may provide better understanding of the interrelationship between osteoporosis and oral bone loss, the underlying causes of the inferior bone strength in the HLA-B27 transgenic animals, and could prove to be a useful model in the elucidation of the pathophysiology of spondyloarthropathy and IBD-associated osteopenia/osteoporosis and in the evaluation of pharmacological intervention(…
MRAP	26338744	Variables like disease duration, diagnosis, human leukocyte antigen subtype B27, erythrocyte sedimentation rate, C-reactive protein, Bath ankylosing spondylitis disease activity Index, Bath ankylosing spondylitis functional index, Bath ankylosing spondylitis metrology index were measured along with outcomes, differentiating between osteopenia and/or osteoporosis.
PIN1	24891219	The identification of Pin1 as a factor involved in cell fusion contributes to the understanding of osteoclast-associated diseases, including osteoporosis, and opens new avenues for therapeutic targets.
TRIM31	24727453	Taken together, our results indicate that RNF185 negatively regulates osteogenesis through the degradation of Dvl2 and down-regulation of canonical Wnt signaling pathway and suggest a possible therapeutic target in osteoporosis.
SLCO2A1	20446967	The range of health risks covered by personal genome testing (PGT) includes cancer, heart disease, obesity, diabetes mellitus and osteoporosis.
PON1	20664283	CONCLUSIONS: These findings show that PON1 polymorphisms modify the association between serum concentrations of lycopene and oxidative stress parameters and bone turnover markers and may, therefore, moderate the risk of osteoporosis.
PON1	25568841	HDL-Associated Paraoxonase 1 as a Bridge between Postmenopausal Osteoporosis and Cardiovascular Disease.
HSPD1	18616692	Taken together, these findings reveal that M. tuberculosis Cpn60.1 is a potent and novel inhibitor of osteoclastogenesis both in vitro and in vivo and a potential cure for bone-resorptive diseases like osteoporosis.
HSPD1	24120669	In addition, our proteomic study of the Hobit secretome revealed that risedronate induced the expression of ERp57, HSP60 and HSC70, three proteins already shown to be associated with the prevention of bone loss in osteoporosis.
HSPD1	23276948	The role of Hsp60 in aging is not easy to elucidate, because aging is accompanied by pathologies (e.g., cardiovascular and neurodegenerative disorders, osteoporosis, diabetes, cancer, etc.)"
SPRN	22864414	Thirty-two female rats were ovariectomized (OVX) to induce osteopenia and osteoporosis and another 32 female rats were sham-operated (SHO) and then randomly divided between the two experiments.
BDNF	26160710	DOI was found to stimulate estradiol biosynthesis in rat ovarian granulosa cells; induce estradiol and progesterone secretion in 16- to 18-month-old female Sprague Dawley rats by upregulating expressions of follicle-stimulating hormone receptor and ovarian aromatase; counteract the progression of osteoporosis and augment bone mineral density; and improve cognitive functioning by upregulating prot…
POLR1E	19214375	One hundred ninety-nine postmenopausal women consulting the Osteoporosis and Osteoarthritis Clinic of Katsuragi Hospital complaining of back and/or knee pain were randomly divided into four groups; Group A (49 subjects) given 5 mg/day alendronate, Group E (50 subjects) 200 mg/day etidronate, Group R (50 subjects) 2.5 mg/day risedronate and Group P no bisphosphonate.
ADIG	15140422	The increase in marrow adipogenesis associated with osteoporosis and age-related osteopenia is well known clinically.
ADIG	25302610	Increased marrow medullary adipogenesis and an associated decrease in bone mineral density, usually observed in elderly individuals, is a common characteristic in senile osteoporosis.
INSRR	24248183	Fewer than 25 years of menstruation was associated with an increased incidence of osteoporosis (IRR 1.80; CI 1.14, 2.86) compared with 35 years or more of menstruation.
INSRR	25879512	The incidence rate ratio (IRR) for SSNHL was significantly greater in older (50-64 y and ≥ 65 y), and female patients, and borderline greater in hypertensive patients with osteoporosis than the controls, IRRs being 1.50, 2.33, 1.87, and 1.59.
INSRR	22298803	From 1998-2008, there were modest increases in BMD testing (from 4 to 6%), osteoporosis treatment (from 15 to 24%), and testing or treatment [from 17 to 27%; aIRR = 1.51; 95% confidence interval (CI) = 1.40-1.63].
INSRR	24434943	Incidence of hip and of proximal humeral fractures, incidence of FRICs (ischemic heart disease, COPD, dementia, depression, diabetes, heart failure, osteoporosis, Parkinson's disease and stroke) and incidence rate ratios (IRR) for fractures in patients with FRICs, and all-cause mortality up to 10 years after a hip or a proximal humeral fracture were analysed.
SEMA3A	25050899	Serum Sema3A concentrations were similar in subjects with normal BMD, osteopenia or osteoporosis, and those with and without osteoporotic fractures.
SEMA3A	25955818	We summarize Sema3A functions in osteoblastogenesis and osteoclastogenesis, as well as in innervation, and we discuss its multifunctional role in various bone diseases such as osteoporosis and low back pain.
SEMA3A	9633020	In order to determine if JRA osteoporosis is related to reduced formation or to increased bone resorption or both, serum levels of calcium (Ca), phosphorus (PO4), magnesium (Mg), alkaline phosphatase (ALP), parathormone (PTHi), 25-hydroxyvitamin D3 (25-OHD) and 1,25-dihydroxyvitamin D3 (1,25-(OH)2D), osteocalcin (OT), carboxyterminal propeptide (P-coll-1-c), and carboxyterminal telopeptide of typ…
CYP21A2	20432821	Decreased bone mineral density and vertebral compression fractures in a young adult male with 21-hydroxylase deficiency congenital adrenal hyperplasia (CAH): is CAH an unrecognized population at risk for glucocorticoid-induced osteoporosis?
CYP21A2	22275473	Testiculopathic men show low CYP21R expression, low 25(OH)D levels, and osteoporosis despite normal testosterone levels.
CYP21A2	18056052	The primary treatment for patients with congenital adrenal hyperplasia (CAH) due to 21-hydroxylase deficiency (21OHD) is glucocorticoid replacement therapy, which at supraphysiologic levels can result in diminished bone accrual and lead to osteopenia and osteoporosis.
CYP21A2	23299503	Children with 21-hydroxylase deficiency (21-OHD) need chronic glucocorticoid (cGC) therapy to replace congenital deficit of cortisol synthesis, and this therapy is the most frequent and severe form of drug-induced osteoporosis.
CYP21A2	23484098	Glucocorticoid-induced osteoporosis in children with 21-hydroxylase deficiency.
OR51F1	26083821	RESULTS: Multivariate conditional logistic regression models demonstrated that hyponatremia was associated with osteoporosis and/or fragility fractures, including chronic [osteoporosis: odds ratio (OR) 3.97, 95% confidence interval (CI) 3.59-4.39; fracture: OR 4.61, 95% CI 4.15-5.11], recent (osteoporosis: OR 3.06, 95% CI 2.81-3.33; fracture: OR 3.05, 95% CI 2.83-3.29), and combined chronic and r…
SHBG	2627750	To quantify the role of endogenous oestrogen activity in osteoporosis we measured relative metacarpal cortical area (RCA), body mass, serum oestrone, oestradiol, androstenedione, and sex hormone binding globulin (SHBG) in 746 postmenopausal women aged 53 to 76 years, sampled from the general population.
SHBG	24408050	Increasing SHBG level was an independent risk factor for osteoporosis among Chinese men.
SHBG	2627750	Sex hormone binding globulin in postmenopausal women: a predictor of osteoporosis superior to endogenous oestrogens.
SHBG	25968889	CONCLUSION: These data confirm the importance of postmenopausal estrogen and SHBG concentrations in the bone loss and the pathogenesis of osteoporosis in elderly women, but not in the occurrence of the VFs.
SHBG	11472897	In contrast, serum SHBG level was significantly higher (+42.2%), whereas free androgen index was lower (-24.8%) in patients with primary or secondary osteoporosis.
SHBG	15193539	It shows that serum SHBG concentration is increased in middle-aged men with osteoporosis and is correlated with hip, spine BMD, and sCTX levels.
SHBG	11380597	Moreover, in men with idiopathic osteoporosis, lower levels of estradiol (91.3 +/- 5.8 vs. 114.6 +/- 7.8 pmol L-1; P = 0.044), higher levels of sex hormone binding globulin (31.5 +/- 3.1 vs. 24.2 +/- 1.4 nmol L-1; P = 0.034) and a decreased free androgen index (42.6 +/- 5.2 vs. 56.4 +/- 5.9; P = 0.016) were seen.
SHBG	20126856	Relative risks of osteoporosis were 1.89 for E2 < 37 pg/mL (p = 0.02); 1.91 for SHBG > 55 nmol/L (p = 0.019); 2.5 for FT < 7 ng/dL (p = 0.015); 2.7 for BT < 180 ng/dL (p = 0.0003).
SHBG	20126856	SHBG > 55 nmol/L, FT < 7 ng/dL and BT < 180 ng/dL can represent additional indications for osteoporosis screening in men over 50 years old.
SHBG	18956301	It will discuss the changes in blood levels of SHBG in aging humans in association with sexual activity, prostate hypertrophy and cancer, uterine leiomyoma, breast cancer, obesity and particularly the relationship between SHBG and HDL-cholesterol, Alzheimer's disease, osteoporosis, and cardiovascular disease.
SHBG	11472897	In conclusion, the present study showed that serum SHBG concentration is increased in middle-aged men with primary or secondary osteoporosis and is correlated with bone remodeling markers, hip bone mineral density, and vertebral fracture risk.
SHBG	20452803	Sex hormone-binding globulin in osteoporosis.
SHBG	10024377	Decreased estradiol levels and free androgen index and elevated sex hormone-binding globulin levels in male idiopathic osteoporosis.
SHBG	15472191	A total of 489 elderly women aged 65-75 yr who participated in a 3-yr, randomized, blinded osteoporosis trial underwent measurements of serum estradiol, bioavailable estradiol, and SHBG.
SHBG	21441053	METHODS: In 20 postmenopausal women with severe osteoporosis compared to 16 healthy controls, we measured serum levels of oxytocin, high sensitive estradiol, testosterone, FSH, LH, SHBG, TSH, osteocalcin, serum type I collagen carboxy-terminal telopeptide, leptin.
SHBG	24408050	SHBG could explain 1.4-2.1 % of the BMD variance after adjustment for age, BMI and FT. No association was found between BSAP and SHBG, TT and FT. Logistic regression analysis showed that BMI, smoking and FT or SHBG was independently associated with the presence of osteoporosis.
SHBG	21723429	Comparison of patients according to quartiles of SHBG levels showed that men in the highest quartile were older, had a lower lumbar spine and total hip BMD and a higher prevalence of osteoporosis and VFs.
SHBG	24408050	Compared with subjects in the lowest quartile of SHBG levels (<36.55 nmol/l), subjects in the third quartile [OR (95 % CI) 2.998 (1.460-6.157), p = 0.002] and the highest quartile [OR (95 % CI) 4.439 (2.192-8.991), p < 0.001] were more likely to suffer with osteoporosis.
SHBG	20452803	Given that serum SHBG elevation is associated with the occurrence of multiple fractures, determination of the serum SHBG level, which can be readily performed in everyday clinical practice, may constitute a useful new marker for predicting the severity of osteoporosis.
SHBG	20452803	SHBG is involved in a number of diseases, including osteoporosis.
SHBG	11472897	In contrast, stepwise linear regression analysis showed that SHBG was significantly correlated with D-Pyr (r = 0.45, p < 0.05) and CTx (r = 0.34, p < 0.05) in primary osteoporosis.
SHBG	21319247	Given the links between sex hormones, SHBG and disease outcomes such as type II diabetes and osteoporosis, it is possible that sex hormones may play a mediating role in the associations between circumstances in early life and later risk of chronic disease.
SHBG	24408050	When SHBG levels were divided into quartiles, FT levels decreased and prevalence of osteoporosis increased with higher SHBG levels.
SHBG	15193539	This study therefore suggests that SHBG may play a key role in male patients with idiopathic or secondary osteoporosis.
SHBG	22588185	Determination of the serum SHBG level may constitute a useful and straightforward marker for predicting the severity of osteoporosis in these patients.
SHBG	18360264	METHODS: Serum testosterone, estradiol, sex hormone binding globulin, gonadotropins, and bone density were measured and prednisone and CsA doses and levels for the first 2 years after transplantation were recorded in a more recently transplanted cohort of 108 participants in a trial comparing alendronate and calcitriol for prevention of posttransplant osteoporosis.
SHBG	11472897	Osteoporosis in men: a potential role for the sex hormone binding globulin.
SHBG	11472897	After adjustment for age and BMI, hip bone mineral density (BMD) was not associated with testosterone or estradiol but only with serum SHBG (r = -0.33, p < 0.01) in primary osteoporosis.
SHBG	22588185	Subjects with osteoporosis had higher SHBG concentrations than patients without osteoporosis (60.97 ± 39.56 vs 44.45 ± 23.32 nmol/l, p = 0.022).
SHBG	17381484	The mosaics had higher BMD and SHBG and lower total cholesterol and FSH than TS with 45,X and did not differ compared with controls in terms of body mass index (BMI), waist/hip ratio, BMD, blood pressure, cholesterol, triglycerides, SHBG, diabetes or osteoporosis.
SHBG	15193539	Sex hormone-binding globulin, estradiol, and bone turnover markers in male osteoporosis.
SHBG	3425232	It is suggested that SHBG may act as one common denominator in the pathogenesis of postmenopausal osteoporosis and endometrial disease by regulating the levels of unbound, biologically active androgens and estrogens.
SHBG	22588185	Patients with SHBG levels in the first quartile (>57.6 nmol/l) had an odds ratio (OR) for osteoporosis of 2.59 (95 % CI, 1.30-5.12; p = 0.009) compared with patients with lower SHBG levels.
SHBG	19679209	BACKGROUND: Polymorphisms of the sex hormone-binding globulin (SHBG) gene are associated with differences in SHBG levels, influencing the risk for breast cancer and polycystic ovarian syndrome, but no association has been reported for osteoporosis in postmenopausal women.
SHBG	11472897	In secondary osteoporosis, SHBG was correlated with D-Pyr (r = 0.48, p < 0.05) and bSAP (r = 0.55, p < 0.01).
P2RX3	11871639	The role of P2X3 receptors in nociception and a new hypothesis concerning purinergic mechanosensory transduction in visceral pain will be considered, as will the therapeutic potential of purinergic agonists or antagonists for the treatment of supraventricular tachycardia, cancer, dry eye, bladder hyperactivity, erectile dysfunction, osteoporosis, diabetes, gut motility and vascular disorders.
CSF1	18040789	The potential role of M-CSF in HIV-associated end organ diseases including HIV-associated dementia, HIV-associated nephropathy, and osteoporosis is discussed.
CSF1	12737328	Although no increased sensitivity to the osteoclastogenic effects of 1,25(OH)D3 or M-CSF was noted, increased bone resorption was found in osteoporosis peripheral blood mononuclear cell (PBMC) cultures to which these factors were added.
CSF1	9819371	Central to the pathogenesis of osteoporosis is the ability of estrogen deficiency to increase osteoclast formation by enhancing stromal cell production of the osteoclastogenic cytokine macrophage colony-stimulating factor (M-CSF).
CSF1	16973889	Transgenic expression of CSF-1 in CSF-1 receptor-expressing cells leads to macrophage activation, osteoporosis, and early death.
CSF1	23028809	enhanced mRNA expression of known osteoporosis-associated genes (LRP5, RUNX2, COL1A1) and of genes involved in osteoclastogenesis (CSF1, PTH1R), but most notably of genes coding for inhibitors of WNT and BMP signaling, such as Sclerostin and MAB21L2.
CSF1	22162676	Several cytokines such as IL-1, IL-6, RANKL, OPG, and M-CSF were implicated in the pathogenesis of osteoporosis.
CSF1	17049513	Taken together, these results suggest that imatinib could be of clinical value in treating diseases where bone destruction can occur due to excessive M-CSF production such as osteoporosis, inflammatory-and tumor-induced osteolysis.
CSF1	21895511	When overexpressed, M-CSF contributes to pathology in a wide variety of diseases, including osteoporosis, obesity, certain human cancers, and in human immunodeficiency virus type 1 (HIV-1) infection, particularly with respect to monocyte/macrophage infection and the development of HIV-1 associated central nervous system disorders.
CSF1	16973889	To investigate whether inflammatory disease or neoplasia was the dominant consequence of autocrine regulation by CSF-1 in CSF-1 receptor (CSF-1R)-expressing cells, we created mice that express CSF-1 under the control of the CSF-1R promoter/first intron driver [transgene TgN(Csf1r-Csf1)Ers (TgRC) mice], which have reduced thymic size, a short lifetime, and low body weight and develop osteoporosis.
CSF1	9664157	Alteration of M-CSF expression is associated with many pathologic processes, implying that the cells of the mononuclear phagocyte system are critical in maintaining the balance between health and disease in conditions such as infertility, osteopetrosis, osteoporosis, atherosclerosis, uremia, and Alzheimer's disease"
IGHG2	20332498	Denosumab, a fully human monoclonal immunoglobulin G(2) antibody, may become available soon for prevention and treatment of postmenopausal osteoporosis.
IGHG2	22087866	The objective of this analysis was to characterize the population pharmacokinetics of denosumab (AMG 162; Prolia®), a fully human IgG2 monoclonal antibody that binds to RANKL, in healthy subjects and postmenopausal women with osteopenia or osteoporosis.
IGHG2	20089807	PF-04840082 is a humanized prototype anti-Dickkopf-1 (Dkk-1) immunoglobulin isotype G(2) (IgG(2)) antibody for the treatment of osteoporosis.
PREP	24580813	METHODS: To identify adherence support interventions that could be evaluated and applied in the PrEP context, we conducted a systematic review across the following prevention fields: hypertension, latent tuberculosis infection, hyperlipidaemia, oral contraceptives, osteoporosis, malaria prophylaxis, and post-exposure prophylaxis for HIV infection.
OR14K1	20308271	The best predictors of a loss of height of 3 cm or more were age (odds ratio [OR] 1.09, 95% confidence interval [CI] 1.08-1.10), previous vertebral fracture (OR 1.49, 95% CI 1.16-1.91), previous nonvertebral fracture (OR 1.26, 95% CI 1.06-1.51), thoracic kyphosis (OR 2.07, 95% CI 1.69-2.55), scoliosis (OR 1.35, 95% CI 1.12-1.63), back pain (OR 1.22, 95% CI 1.07-1.39) and osteoporosis (OR 1.39, 95…
NEIL3	20935449	The association between an increase in 30minPG (by 1 SD) and the metabolic abnormalities of diabetes and CVD such as hypertension, overweight and obesity, central obesity, and hyperlipidemia; osteoporosis was assessed by logistic regression analysis after controlling for FPG and 2hPG.
BCHE	15168159	Both disorders had been controlled for around 15 years by oral prednisolone and a cholinesterase inhibitor following surgical removal of invasive thymoma and radiotherapy, but muscular weakness due to myalgia and an increase in serum levels of myogenic enzymes, mainly ascribable to the recurrence of PM, reappeared immediately after cessation of these drugs, which was done because the patient had …
ENOSF1	25625570	Radix Dipsaci total saponins (RTS) are primary active components of Radix Dipsaci, which is administered orally for the treatment of osteoporosis according to Chinese Medicine.
DYNLT1	2492885	Age-related bone loss in lumbar vertebrae of CW-1 female mice: a histomorphometric study.
SLC26A3	22892442	BACKGROUND: The prevalence of osteoporosis in chronic liver disease (CLD) varies considerably among the studies, depending on patient selection and diagnostic criteria.
SLC26A3	16051419	RESULTS: Based on WHO criteria, the prevalence of osteoporosis was significantly higher in patients with CLD (72 versus 33%) compared to healthy postmenopausal women.
SLC26A3	9514992	Osteopenia is a recognised complication of cholestatic liver diseases (CLD), usually ascribed to metabolic bone diseases such as osteomalacia or osteoporosis, with a prevalence from 10 to 56%, depending on the nature of liver disease.
SLC26A3	19636560	It was concluded that osteoporosis is effectively a complication of CLD.
SLC26A3	19636560	Age, menopausal status, cirrhosis and advanced histological stage are not determinant factors for developing osteoporosis in patients with CLD.
SLC26A3	10593785	RESULTS: Osteoporosis (a T score < -2.5 at the hip or spine) was five times as likely in patients with CLD as in control subjects.
SLC26A3	19962256	Osteoporosis is common in CLD but robust evidence is lacking on fracture prevention.
SLC26A3	10593785	BACKGROUND: Men with chronic lung disease (CLD) are at risk for osteoporosis, but the relative contributions of their chronic pulmonary disease, glucocorticoid therapy, and other factors toward loss of bone has not been established.
SLC26A3	20526703	METHODS: Sixty women with postmenopausal osteoporosis were randomized to two groups: group A (CLD 100 mg IM weekly for 12 months), and group B (CLD 200 mg IM every 2 weeks for 12 months).
SLC26A3	19636560	Osteoporosis has become an increasingly recognized complication among patients with chronic liver disease (CLD).
SLC26A3	16143421	BACKGROUND/AIMS: Osteopenia and osteoporosis are common complications of chronic liver disease (CLD).
SLC26A3	11782574	OBJECTIVE: Patients with chronic liver disease (CLD) have an increased prevalence of osteoporosis.
SLC26A3	16051419	CONCLUSIONS: CLD increases the prevalence of osteoporosis in postmenopausal women, particularly in the lumbar spine.
SLC26A3	19636560	Cholestasis in addition to female sex and lower weight and height are risk factors of osteoporosis in CLD.
SLC26A3	16051419	OBJECTIVES: Patients with chronic liver disease (CLD) have an increased prevalence of osteoporosis.
SLC26A3	19636560	The aim of the present study was to assess the prevalence and risk factors of osteoporosis in patients with CLD (primary biliary cirrhosis and chronic viral hepatitis B or C patients) in comparison with a group of age- and sex-matched controls.
SLC26A3	24641458	Osteoporosis and osteopenia are alterations in bone mineral density (BMD) that frequently occur in the context of chronic liver disease (CLD).
SLC26A3	10593785	Although the prevalence of osteoporosis was higher (ninefold) after chronic glucocorticoid therapy, patients with CLD who had never been treated with glucocorticoids had a substantial (fourfold) risk of osteoporosis.
SLC26A3	24641458	We will also review the treatment of osteoporosis in CLD in general, focusing on specific aspects related to bone loss in ALD.
SLC26A3	1811817	Several radiographic techniques are currently available for osteoporosis screening, including dual photon absorptiometry (DPA), quantitative computed tomography (QCT), and dual-energy radiographic absorptiometry (DRA).
BCL2	22648569	When compared with the osteoporosis group (p < 0.05), alendronate (30 days), EGb1 and EGb2 (20/30 days) increased the Bcl-2 expression; EGb2 and alendronate (20 days) EGb1 and EGb2 (30 days) reduced the Bax expression; and EGb1 and EGb2 (20/30 days) reduced the X-ray density.
BCL2	21803180	We searched for the molecules responsible for disuse osteoporosis using BCL2 transgenic mice, in which the osteocyte network was disrupted.
BCL2	22648569	OBJECTIVE: Evaluate the effects of the extract of Ginkgo biloba (EGb) in the glucocorticoid-induced-osteoporosis through the Bax and Bcl-2 expressions by osteoblast cells, the x-ray and bone density of the tibia.
BCL2	22648569	RESULTS: When compared the osteoporosis to the control group (p <0.05): Bax and x-ray density increased; Bcl-2 and the bone density reduced.
BCL2	22114675	As osteoblast apoptosis is in part responsible for osteoporosis in sex steroid deficiency, glucocorticoid excess, and aging, bone loss might be inhibited by the upregulation of Bcl2; however, the effects of Bcl2 overexpression on osteoblast differentiation and bone development and maintenance have not been fully investigated.
BCL2	22648569	The effect of the Ginkgo biloba extract in the expression of Bax, Bcl-2 and bone mineral content of Wistar rats with glucocorticoid-induced osteoporosis.
BCL2	22012179	In conclusion, simvastatin protects MG63 cells from oxidative stress-induced apoptosis through downregulation of caspase-3 and caspase-9 activation and upregulation of Bcl-2 expression, suggesting a protective effect in osteoporosis.
BCL2	20966881	Simultaneously, the mRNA expression of caspase-3, capase-9, RANKL was down-regulated and that of bcl-2 was up-regulated, which partially explains the anti-osteoporosis mechanism in MC3T3-E1 cells.
BCL2	22648569	CONCLUSIONS: The EGb improved the Bcl-2 and reduced the Bax expression by osteoblasts in the mandibular alveolar bone and recovered the mineral content in the tibia of rats with glucocorticoid-induced-osteoporosis.
BCL2	16007339	These studies suggest a link between Bcl-2 and sex regulation of bone development and age-related bone loss.
MMP16	12218373	The most consistent finding was that of IL-6 elevations in 7/7 patients (3 females/4 males) who reported symptoms of osteoporosis and/or bone pain (1 SuSM, 3 ISM, 3 ASM) in the absence of any coexisting condition involving bone pathology.
ADI1	14523363	Homeostasis restoration was accompanied by a 2.0-2.4-fold decrease in acute respiratory disease incidence, reduced incidence of the clinical manifestations of ischemic heart disease, hypertension disease, deforming osteoarthrosis and osteoporosis as compared to the control.
ADI1	22045518	Recent reports suggest a role of hypovitaminosis D in the pathogenesis of inflammatory autoimmune diseases (ARD); we investigated 25(OH)vitamin D plasma level before and after supplementation in ARD and NARD (non-ARD: osteoporosis and/or OA) patients.
ADI1	25327450	INTRODUCTION: Osteoporosis affects millions of elderly patients, and anti-resorptive drugs (ARD) such as bisphosphonates (BP) represent the first-line therapy.
ADI1	10338731	Cost/benefit analyses of alendronate treatment for osteoporosis should include costs of treating ARD.
PTHLH	25393645	CONTEXT: Abaloparatide is a novel synthetic peptide analog of parathyroid hormone-related protein (PTHrP) that is currently being developed as a potential anabolic agent in the treatment of postmenopausal osteoporosis.
PTHLH	10067016	The increased circulating PTH-rP might contribute to the pregnancy-associated osteoporosis in women who probably are already osteopenic.
PTHLH	9265617	The N-terminal portion, PTHrP-(1-34), retains all the calciotropic parathyroid hormone-like activity and is a lead structure for the design of novel, bone anabolic agents for the treatment of bone disorders such as osteoporosis.
PTHLH	19121329	Parathyroid hormone-related protein (PTHrP) has been shown to have anabolic effects in women with postmenopausal osteoporosis.
PTHLH	20061412	Parathyroid hormone-related protein for the treatment of postmenopausal osteoporosis: defining the maximal tolerable dose.
PTHLH	19342458	These findings are important with respect to the relatively new therapy of postmenopausal osteoporosis with PTHrP analogs.
PTHLH	20876711	The future therapeutic potential of PTHrP(1-36) for the treatment of diabetes is especially relevant given the complementary therapeutic efficacy of PTHrP(1-36) in postmenopausal osteoporosis.
PTHLH	26568273	Moreover, one haplotype (rs12425376-rs10843047-rs42294) covering the 5' end of PTHLH was associated with postmenopausal osteoporosis.
PTHLH	24516619	Recombinant human parathyroid hormone related protein 1-34 and 1-84 and their roles in osteoporosis treatment.
PTHLH	19121329	The results indicate that glucocorticoids affect the signalling pathway of PTHrP by regulating both PTHrP and PTH1R expression and these mechanisms could be involved in glucocorticoid-induced osteoporosis.
PTHLH	23807531	Effects of different dosages of parathyroid hormone-related protein 1-34 on the bone metabolism of the ovariectomized rat model of osteoporosis.
PTHLH	19342773	Parathyroid hormone-related protein (PTHrP) plays an important role in regulating embryonic skeletal development and is abnormally regulated in the pathogenesis of skeletal complications observed with many cancers and osteoporosis.
PTHLH	12496664	The recent demonstration that nascent parathyroid hormone-related protein not only follows the secretory pathways, but also directly translocates to the nucleus, is beginning to uncover new actions for the protein in a number of physiological systems such as bone, mammary gland and vascular smooth muscle, as well as in pathological situations, such as cancer, osteoporosis, sepsis, atherosclerosis…
PTHLH	9709948	This uncoupling, if it were to continue over the longer term, would predict that PTHrP-(1-36) might be a potent anabolic therapeutic agent for osteoporosis.
PTHLH	24078470	Parathyroid hormone and parathyroid hormone-related protein analogs as therapies for osteoporosis.
PTHLH	10934650	We therefore selected three PTH/PTHrP molecules for direct comparison in vivo in an adult rat model of postmenopausal osteoporosis: PTH(1-34), PTHrP(1-36), and the PTH analog, SDZ-PTH 893 ¿Leu8, Asp10, Lys11, Ala16, Gln18, Thr33, Ala34 human PTH 1-34 [hPTH(1-34)]¿.
PTHLH	15984427	MicroCT is also useful for studying osteoporosis in mice and phenotypes of mice with gene manipulation, such as SHIP-knockout mice, which are severely osteoporotic due to increased numbers of hyperresorptive osteoclasts, PTHrP heterozygous-null mice, and mice with Zmpste24 deficiency.
PTHLH	16138187	demonstrate that osteoblast-specific ablation of Pthrp in mice results in osteoporosis and impaired bone formation both in vivo and ex vivo.
PTHLH	10067016	Pregnancy-associated osteoporosis with elevated levels of circulating parathyroid hormone-related protein: a report of two cases.
PTHLH	23661240	We performed a 3-month randomized, prospective study in 105 postmenopausal women with low bone density or osteoporosis, comparing daily subcutaneous injections of PTHrP(1-36) to PTH(1-34).
PTHLH	10934650	These studies show that PTH(1-34), PTHrP(1-36), and PTH-SDZ-893 significantly and progressively increase bone mass and bone strength in this rat model of postmenopausal osteoporosis.
PTHLH	23500550	Studies mainly in osteoporosis rodent models and limited data in postmenopausal women suggest that N-terminal PTHrP peptides might be considered a promising bone anabolic therapy.
PTHLH	9301664	Both the parathyroid hormone (PTH) and the functionally similar parathyroid hormone-related protein (PTHrP) have served as templates for the development of novel bone anabolic agents for the treatment of osteoporosis.
PTHLH	15694400	The importance of PTH and PTHrP is evident by the variety of clinical syndromes caused by deficiency or excess production of either peptide, and the demonstration that intermittent injection of PTH increases bone mass, and thus provides a means to treat osteoporosis.
PTHLH	26578690	Our observations suggest a link between increased concentrations of PTHrP in postmenopausal women with low body mass index and increased incidence of osteoporosis.
PTHLH	16138191	Mice heterozygous for targeted disruption of Pthrp exhibit, by 3 months of age, diminished bone volume and skeletal microarchitectural changes indicative of advanced osteoporosis.
PTHLH	24516619	Parathyroid hormone related protein (PTHrP) is one of the candidates for clinical osteoporosis treatment.
PTHLH	8894135	In this mini-review, the theoretical basis for the exploration and development of PTHrP(1-36) as a potential therapeutic agent for osteoporosis is considered.
PTHLH	18096456	Parathyroid hormone-related peptide (PTHrP) has been shown to have anabolic effects on bone in women with postmenopausal osteoporosis.
PTHLH	23807531	We used an ovariectomized (OVX) rat model of osteoporosis to study the effects of PTHrP(1-34) on bone metabolism by measuring bone mineral density (BMD), bone histomorphometrics, and biomechanical parameters.
PTHLH	3077245	The isolation and characterization of PTHrP has added to our understanding of the mechanisms of hypercalcaemia and may contribute to the understanding of other metabolic bone diseases, such as osteoporosis and Paget's disease.
PTHLH	12574182	Short-term, high-dose parathyroid hormone-related protein as a skeletal anabolic agent for the treatment of postmenopausal osteoporosis.
PTHLH	21243337	Severe postpartum osteoporosis with increased PTHrP during lactation in a patient after total thyroidectomy and parathyroidectomy.
PTHLH	18426836	OBJECTIVE: Mice with osteoblast-specific deletion of parathyroid hormone-related protein (PTHrP) exhibit impaired recruitment and increased apoptosis of osteogenic cells resulting in decreased bone formation and premature osteoporosis.
PTHLH	12574182	We examined whether PTHrP might share anabolic properties in osteoporosis.
PTHLH	9709948	These findings suggest that PTHrP might have therapeutic benefit in the treatment of osteoporosis.
PTHLH	11375774	The marked premature osteoporosis observed in mice heterozygous for the disrupted Pthrp allele also points to a crucial role for the protein in the maintenance of the adult skeleton.
PTHLH	23807531	Based on our results, intermittent low-dose PTHrP(1-34) injection promoted bone formation in OVX rats, suggesting a high potential for therapeutic use in osteoporosis patients.
PTHLH	24078470	These agents and several other PTH and PTHrP analogs, including some which are not administered as injections, continue to be investigated as potential anabolic therapies for osteoporosis.
PTHLH	26562265	Abaloparatide (ABL) is a novel synthetic analog of human PTHrP (1-34) that holds promise as a new osteoporosis therapy, as studies in animals suggest that it can stimulate bone formation with less of the accompanying bone resorption and hypercalcemic effects that can occur with PTH (1-34).
PTHLH	8894135	PTHrP(1-36) as a skeletal anabolic agent for the treatment of osteoporosis.
PTHLH	2184438	The isolation and characterization of PTHrP has added to our understanding of the mechanisms of hypercalcemia, and may contribute to the understanding of other metabolic bone diseases such as osteoporosis and Paget's disease.
PTHLH	18056044	These developments plus recent insights into previously unappreciated ligand-receptor conformations that cause prolonged biological activation have stimulated the field of calcium and bone biology and posed new questions about the role of PTH and PTHrP as well as possible new directions in the therapy of osteoporosis and calcium-deficit states.
PTHLH	12415434	These findings indicate that age-related bone loss in humans is associated with a decrease in the osteoblastic secretion of both PTHrP and VEGF in the knee, a predominantly trabecular bone.
PTHLH	22745236	Now, research into the basic biology of PTHrP has suggested previously unrecognized connections to a variety of disease states such as osteoporosis, osteoarthritis, and breast cancer and has highlighted how PTHrP itself might be used in therapy for osteoporosis and diabetes.
PTHLH	20844958	Parathyroid hormone-like hormone (PTHLH) was detected in rat gastric enterochromaffin-like (ECL) cells in 2005, and some researchers suggested that it was the hypothetical hormone gastrocalcin that is believed to lead to osteoporosis.
PTHLH	7540609	Osteoporosis-like changes in Walker carcinoma 256-bearing rats, not accompanied with hypercalcemia or parathyroid hormone-related protein production.
PTHLH	12574182	Larger clinical trials are required to confirm these results and fully assess the anabolic potential of PTHrP in osteoporosis.
PTHLH	2682846	The isolation and characterization of PTHrP have added to our understanding of the mechanisms of hypercalcemia and may contribute to the understanding of other metabolic bone diseases, such as osteoporosis and Paget's disease.
PTHLH	10066882	Parathyroid hormone and parathyroid hormone-related protein: model systems for the development of an osteoporosis therapy.
KL	26460265	Klotho, a new marker for osteoporosis and muscle strength in β-thalassemia major.
KL	25038521	In this regard, the GHRH-GH-IGF-1/Insulin, TOR-S6K1,NAD(+)-Sirtuin, P53, Klotho and APOE pathways have been linked to processes associated with age-related diseases, including cancer, cardiovascular disease, diabetes, osteoporosis, and neurodegenerative diseases, all of which directly influence health in aging, and represent key targets in anti-aging therapy.
KL	9363890	A defect in klotho gene expression in the mouse results in a syndrome that resembles human ageing, including a short lifespan, infertility, arteriosclerosis, skin atrophy, osteoporosis and emphysema.
KL	15256067	Mice homozygous for severely hypomorphic alleles of the Klotho gene exhibit a syndrome resembling human aging, including atherosclerosis, osteoporosis, emphysema, and infertility.
KL	16144705	Mice carrying a loss-of-function mutation in the klotho gene (KL(-/-) mice) develop ageing-like symptoms around 4 weeks after birth and suffer from multiple age-related disorders observed in humans, including osteoporosis, arteriosclerosis, and pulmonary emphysema.
KL	11027545	The klotho gene, originally identified by insertional mutagenesis in mice, suppresses multiple aging phenotypes (e.g., arteriosclerosis, pulmonary emphysema, osteoporosis, infertility, and short life span).
KL	26462468	In summary, serum sKlotho levels inversely correlated with age and FGF23, and were significantly reduced in patients with osteoporosis.
KL	15758250	Homozygous Klotho mutant (kl-/-) mice exhibit a variety of phenotypes resembling human aging, including arteriosclerosis, infertility, skin atrophy, osteoporosis, and short life span.
KL	12110410	These findings indicate that the klotho gene may be a candidate for the genetic regulation of common age-related diseases like osteoporosis and spondylosis, and we provide the first evidence suggesting that this gene may be involved in the etiology of human diseases.
KL	22242193	1,25-dihydroxyvitamin D3 (1,25D3) was reported to induce premature organismal aging in fibroblast growth factor-23 (Fgf23) and klotho deficient mice, which is of main interest as 1,25D3 supplementation of its precursor cholecalciferol is used in basic osteoporosis treatment.
KL	15834732	The klotho gene was identified in 1997 as the gene whose severe insufficiency (kl/kl) causes a syndrome resembling human aging, such as osteoporosis, arteriosclerosis, gonadal atrophy, emphysema, and short life span in a mouse strain.
KL	26462468	Only osteoporosis affected sKlotho and FGF23 levels among the various complications and patient status including medication.
KL	17151836	For example, mice that lack the cytokine decoy receptor osteoprotegerin or the hormone Klotho display a combined osteoporosis-arterial calcification phenotype.
KL	15536520	Genetic variants of the androgen receptor and klotho protein may contribute to variation in bone mass as well as to predisposition to osteoporosis.
KL	21769735	In mice, disruption of klotho expression results in a syndrome that includes sarcopenia, atherosclerosis, osteoporosis, and shortened lifespan, and conversely, overexpression of klotho leads to a greater longevity.
KL	10892339	We conclude that a defect in klotho gene expression leads to the independent impairment of osteoblast and osteoclast differentiation, which can be a cause of low-turnover osteoporosis.
KL	18248363	The klotho gene-deficient mouse is known as an animal model for an accelerated gerontic state, mimicking osteoporosis, skin atrophy, ectopic calcification, and gonadal dysplasia.
KL	12369777	Because mice deficient in klotho gene expression exhibit multiple aging phenotypes including osteopenia, we explored the possibility that the klotho gene may contribute to age-related bone loss in humans by examining the association between klotho gene polymorphisms and bone density in two genetically distinct racial populations: the white and the Japanese.
KL	12110410	Based on the fact that the klotho-deficient mouse exhibits multiple aging phenotypes, including osteopenia and subchondral sclerosis of joints, we explored the possibility of whether human klotho gene polymorphism is associated with two major age-related skeletal disorders: osteoporosis and spondylosis.
KL	19444937	Recent studies using genetically modified mice, such as FGF23-/- and Klotho-/- mice that exhibit altered mineral homeostasis due to a high vitamin D activity showed features of premature aging that include retarded growth, osteoporosis, atherosclerosis, ectopic calcification, immunological deficiency, skin and general organ atrophy, hypogonadism and short lifespan.
KL	17332731	Klotho gene mutation leads to a syndrome strangely resembling chronic kidney disease patients undergoing dialysis with multiple accelerated age-related disorders, including hypoactivity, sterility, skin thinning, muscle atrophy, osteoporosis, vascular calcifications, soft-tissue calcifications, defective hearing, thymus atrophy, pulmonary emphysema, ataxia, and abnormalities of the pituitary glan…
KL	11768731	Targeted disruption of the klotho gene induces multiple phenotypes characteristic of human aging, including arteriosclerosis, pulmonary emphysema and osteoporosis.
KL	19421891	In mice a defect of Klotho gene expression results in multiple aging-like phenotypes including short lifespan, osteoporosis and atherosclerosis, while its over-expression suppresses aging and extends lifespan.
PHC3	21938381	We analyzed data from single teriparatide doses in healthy Japanese and Caucasian postmenopausal women (J-PK) and from studies of 6 months [Phase 2, dose ranging (J-Ph2)] and 12 months [Phase 3, efficacy and safety (J-Ph3)] of randomized, placebo-controlled, once-daily treatment in Japanese subjects with osteoporosis.
NOVA2	15118812	According to the WHO definition, where subjects are subdivided by BMD values into three groups (women with normal BMD, osteopenia, and osteoporosis), a significant difference was found only for the domains which explore general health perception (p<0.01 by ANOVA) and mental function (p<0.001 by ANOVA).
NOVA2	22872068	The mean U-NTX/Cr at 4 months was higher in patients with secondary osteoporosis compared with those with primary osteoporosis (P < 0.01, ANOVA).
NOVA2	16133637	By using one-way ANOVA, our study found that participants who had studied osteoporosis at school, had graduated from university, were RNs or LPNs and had studied osteoporosis as part of continuing education (CE) had higher knowledge scores.
NOVA2	24851598	Chest expansion index was significantly reduced in patients having osteoporosis in lumbar and total hip region (p = 0.015, Oneway Anova for osteoporosis of lumbar region; p = 0.038, Oneway Anova for osteoporosis of total hip region).
NOVA2	19162798	Multiple regression analysis identified factors influencing lumbar kinematics while ANOVA examined differences in morphology with normal bone mineral density, osteopenia and osteoporosis.
NOVA2	24851598	Significant difference in the mobility of thoracic spine was observed in patients in regard to the WHO classification of osteoporosis in lumbar and femoral region (p = 0.031, Oneway Anova for osteoporosis of lumbar region; p = 0.022, Oneway Anova for osteoporosis of total hip region).
NOVA2	18418334	Demographic and clinical data were compared between the groups with the use of independent-sample t test analysis (two groups) and analysis of variance (ANOVA) was used to estimate the between-group differences and changes by severity of osteoporosis and regression analyses to find predictors for changes.
NOVA2	21928224	Risk factors for osteopenia and osteoporosis were determined by t-tests or ANOVA and chi-square analysis as appropriate.
NOVA2	21452281	Differentially expressed genes in osteoporosis versus control groups were identified using the Bayesian ANOVA for microarrays (BAMarray) method, whereas the R-package Limma (Linear Models for Microarray Data) was used to determine whether these transcripts were explained by disease, age, body mass index (BMI), or combinations thereof.
COPG1	10469275	The demonstration that cOPG can inhibit bone resorption suggests that this molecule may be useful in the treatment of diseases including hyperparathyroidism, humoral hypercalcemia of malignancy, osteoporosis, and inflammatory bone disease, which are characterized, in part, by increases in osteoclastic bone resorption.
TNFRSF11B	23327689	BACKGROUND: This study is performed to evaluate gingival crevicular fluid (GCF) and serum levels of soluble receptor activator of nuclear factor-κB ligand (sRANKL), interleukin (IL)-17A, IL-17E, IL-17F, IL-17A/F, and osteoprotegerin (OPG) in women with rheumatoid arthritis (RA), osteoporosis (OPR), and those who are systemically healthy (SH), all with periodontal disease.
TNFRSF11B	22837423	Recent studies indicate that the circulating levels of OPG and RANKL are inversely related to bone turnover and Bone Mineral Density (BMD) and contribute to the development of osteoporosis in postmenopausal women, and thalassemic patients.
TNFRSF11B	18299476	Acute changes in serum osteoprotegerin and receptor activator for nuclear factor-kappaB ligand levels in women with established osteoporosis treated with teriparatide.
TNFRSF11B	17703270	In postmenopausal women, IGF-I was lower in women with osteoporosis than in those with normal BMD (p = 0.056), but no differences were found among OPG, RANKL and OPG/RANKL ratio.
TNFRSF11B	20210559	The association of serum osteoprotegerin and osteoporosis in postmenopausal hemodialysis patients: a pilot study.
TNFRSF11B	14679212	Here, we report a rationally designed small molecule mimic of osteoprotegerin to inhibit osteoclast formation in vitro and limit bone loss in an animal model of osteoporosis.
TNFRSF11B	20534768	OPG and RANK polymorphisms are both associated with cortical bone mineral density: findings from a metaanalysis of the Avon longitudinal study of parents and children and gothenburg osteoporosis and obesity determinants cohorts.
TNFRSF11B	26092508	Autoantibodies neutralising the effect of the bone regulatory cytokine osteoprotegerin (OPG) have been described in a patient with severe osteoporosis and coeliac disease.
TNFRSF11B	21411255	CONCLUSIONS: Our results suggest that, in postmenopausal osteoporosis, polymorphisms 245T > G and 1181G > C, as well as haplotype CT in TNFRSF11B gene influence BMD.
TNFRSF11B	23562283	Anti-osteoporosis treatment can improve bone strength, prevent osteoporosis and rebalance the OPG-RANK-RANKL system, which may help to prevent curve progression in AIS.
TNFRSF11B	22674934	This study aimed to analyze the effect of RM-A on the orthodontic treatment of OPG-/- mice (a model of osteoporosis patients with high levels of bone turnover).
TNFRSF11B	23837846	CONCLUSION: These findings indicate that the g.19124G>A genetic polymorphism in the OPG gene is potentially related to BMD and osteoporosis in Chinese postmenopausal women, and the allele A could be associated with a lower BMD and an increased risk factor for osteoporosis.
TNFRSF11B	23845033	The serum levels of MMP-9, MMP-9/TIMP-1 ratio, TNF-α, RANKL, OPG, and the RANKL/OPG ratio were higher in COPD patients with osteoporosis than in individuals with normal or low bone mineral density (BMD) (N = 30, all P < 0.05 or < 0.01).
TNFRSF11B	24065669	Association between single nucleotide polymorphisms of the osteoprotegerin gene and postmenopausal osteoporosis in Chinese women.
TNFRSF11B	17151836	For example, mice that lack the cytokine decoy receptor osteoprotegerin or the hormone Klotho display a combined osteoporosis-arterial calcification phenotype.
TNFRSF11B	22729371	PURPOSE: Recombinant osteoprotegerin (OPG) has been proven to be useful for treating various bone disorders such as osteoporosis.
TNFRSF11B	16370384	Amgen, as part of its program targeting the RANK/RANKL/ osteoprotegerin pathway, is developing denosumab, a fully human monoclonal antibody, delivered subcutaneously, targeting the receptor activator of nuclear factor-kappaB ligand, for the potential treatment of diseases associated with bone loss, such as osteoporosis and bone metastases.
TNFRSF11B	22119834	According to the length of the estrogenic deprivation period, postmenopausal women with osteoporosis presented either increased (cohort 1) or decreased (cohort 2) OPG levels demonstrating osteoblast activation and osteoblast apoptosis stimulation, respectively.
TNFRSF11B	19229472	In conclusion, osteoprotegerin and RANKL are abnormal in patients with PBC, regardless of osteoporosis.
TNFRSF11B	26065000	Osteoprotegerin Polymorphisms in a Mexican Population with Rheumatoid Arthritis and Generalized Osteoporosis: A Preliminary Report.
TNFRSF11B	18052758	UNLABELLED: A comparative study of bone metabolism between postmenopausal women with osteoarthritis and osteoporosis showed that differential levels of bone remodeling markers, leptin, free leptin index, and osteoprotegerin might partly contribute to the proposed inverse relationship in bone mass between postmenopausal women with osteoarthritis and osteoporosis.
TNFRSF11B	24410296	We performed a meta-analysis of studies on the associations between OPG A163G and G1181C polymorphisms and the risk of osteoporosis.
TNFRSF11B	15068494	Recently, two new cytokines, osteoprotegerin (OPG) and RANKL, have been implicated in the pathogenesis of postmenopausal osteoporosis and other metabolic bone diseases.
TNFRSF11B	16942925	Urinary excretion of GGT, corrected for creatinine, was found to be increased in osteoprotegerin (OPG)-deficient osteoporotic mice as well as in patients with postmenopausal osteoporosis (67-83 years of age); in both cases the urinary level decreased after treatment of patients or mice with alendronate, a selective inhibitor of bone resorption, concomitantly with a reduction in DPD and NTX.
TNFRSF11B	11358418	Osteoprotegerin ligand stimulates osteoclast formation and activation, membrane-bound and soluble osteoprotegerin ligand leading to osteoporosis as well as erosions.
TNFRSF11B	23990207	OPG regulates bone homeostasis, and its inactivation in mice results in severe osteoporosis.
TNFRSF11B	11375772	Conversely, ablation of the OPG gene causes severe osteoporosis in mice.
TNFRSF11B	16303111	Osteoprotegerin as a potential therapy for osteoporosis.
TNFRSF11B	10792853	Recently, the results of the first clinical trial with OPG supported its potential as a therapeutic agent for osteoporosis.
TNFRSF11B	12213850	These findings implicate a role for OPG in the development of osteoporosis.
TNFRSF11B	17786784	Osteoprotegerin (OPG) and receptor activator of NF-kappaB ligand (RANKL) have been recently implicated in the pathogenesis of various types of osteoporosis.
TNFRSF11B	17878722	Osteoprotegerin (OPG, TNFRSF11B) and interleukin-6 (IL-6, IL6) are putative target genes for estrogen signaling and have been implicated in both cardiovascular diseases and osteoporosis.
TNFRSF11B	23335067	Osteoprotegerin gene (OPG) is an important candidate gene of osteoporosis.
TNFRSF11B	18938269	The reported association of polymorphisms in the osteoprotegerin (OPG) gene with osteoporosis suggests that the OPG gene may also influence the genetic risk for periodontitis.
TNFRSF11B	11239019	In the present study, in order to clarify the roles of OPG in the development of glucocorticoid-induced osteoporosis, we measured circulating OPG before and after glucocorticoid therapy.
TNFRSF11B	18183447	OPG-deficient (OPG-/-) mice develop severe osteoporosis caused by significant enhancement of bone resorption by osteoclasts.
TNFRSF11B	22674934	In osteoprotegerin-deficient (OPG-/-) mice, osteoclast activity causes bone resorption to outpace bone formation, leading to the development of severe osteoporosis.
TNFRSF11B	25148458	These same genes also displayed SNP-dependent variation in E2 induction that paralleled the SNP-dependent induction of known osteoporosis genes, such as osteoprotegerin.
TNFRSF11B	19158438	CONCLUSION: The OPG level provides a good predictor of osteoporosis as well as NTx in elderly women; additionally, the findings suggest that OPG might protect elderly women from bone loss or fractures.
TNFRSF11B	12181640	Overexpression of OPG in mice has been reported to result in osteopetrosis, whereas targeted disruption of OPG in mice has been associated with osteoporosis.
TNFRSF11B	15869920	The combination of PTH with OPG has been proposed as a potential therapy in patients with severe osteoporosis.
TNFRSF11B	26202809	OBJECTIVES: The aim of the study was to evaluate the frequency of gene polymorphisms OPG -163A/G, -950T/C and 1181G/C, assessing their relations with the clinical parameters of osseous turnover and the degree of postmenopausal osteoporosis.
TNFRSF11B	23643930	The risk of osteoporosis is reduced as TGF-β1 increases and increases as OPG was raised.
TNFRSF11B	19352306	Osteoprotegerin and RANKL in the pathogenesis of osteoporosis in patients with thalassaemia major.
TNFRSF11B	19352306	In this study, the possible role of the OPG-RANKL system in the pathogenesis of osteoporosis in thalassemia major is assessed, as well as any correlations between the serum levels of OPG and RANKL and bone mineral density (BMD), 17 beta-estradiol and free testosterone and the relationship between T-score of BMD and OPG/RANKL ratio.
TNFRSF11B	23329761	The osteoprotegerin (OPG) is an important candidate gene in the pathogenesis of osteoporosis.
TNFRSF11B	23327689	Gingival crevicular fluid, serum levels of receptor activator of nuclear factor-κB ligand, osteoprotegerin, and interleukin-17 in patients with rheumatoid arthritis and osteoporosis and with periodontal disease.
TNFRSF11B	21182499	CONCLUSION: Psoriasis patients with or without arthritis may suffer from osteoporosis as evidenced by significantly increased serum OPG.
TNFRSF11B	25580430	This study aimed to detect the potential association of OPG gene polymorphisms with osteoporosis in postmenopausal women.
TNFRSF11B	11375772	OPG also inhibits bone resorption in a variety of animal disease models, including ovariectomy-induced osteoporosis, humoral hypercalcemia of malignancy, and experimental bone metastasis.
TNFRSF11B	19574937	Effects of alendronate treatment on serum levels of osteoprotegerin and total receptor activator of nuclear factor kappaB in women with postmenopausal osteoporosis.
TNFRSF11B	15003790	Expression of osteoclast differentiation factor and osteoclastogenesis inhibitory factor in rat osteoporosis induced by immunosuppressant FK506.
TNFRSF11B	24424018	Recently we have shown that the adipose-tissue derived OPG relates to BMD in patients with chronic obstructive pulmonary disease (COPD), a condition associated with increased risk of osteoporosis.
TNFRSF11B	24424018	Area under receiver operator curve for OPG as a discriminator of osteoporosis was 0.787 (95% CI, 0.653-0.921) (p = 0.005).
TNFRSF11B	23271131	Also, VDR and OPG genes are important candidates for osteoporosis in RA patients.
TNFRSF11B	23856613	These findings provide more evidence that the SNPs in OPG gene could affect BMD and osteoporosis, and the allele-A of g.19190C>A and allele-G of g.25602A>G genetic variants are associated with increased risk for osteoporosis in Chinese postmenopausal women.
TNFRSF11B	12720535	Moreover, low dose corticosteroid-associated osteoporosis is probably not mediated by inhibition of OPG.
TNFRSF11B	15526523	Thus, one of the aims of our study was to investigate the relationships between OPG levels and biochemical markers of bone turnover and bone density in women with and without osteoporosis.
TNFRSF11B	24737508	The purpose of this study was to investigate the association of the g.27667T>A genetic variant in the osteoprotegerin (OPG) gene with bone mineral density (BMD) and osteoporosis.
TNFRSF11B	21411255	As variations in the TNFRSF11B gene could alter the susceptibility to osteoporosis, the aim of study was to investigate association of two TNFRSF11B gene polymorphisms with BMD and serum OPG concentration in postmenopausal women.
TNFRSF11B	12793029	In women with osteoporosis, however, there was a strong relationship between serum OPG and markers of bone turnover (serum c-terminal crosslinked telopeptides of thpe I collagen (sCTX): r = +0.82, p < 0.0001; osteocalcin (OC): r = +0.69, p < 0.0001), with patients who had higher levels of bone-turnover markers showing higher serum levels of OPG.
TNFRSF11B	19574937	The aims of the study were to evaluate the effects of alendronate treatment (70 mg once/wk) on serum concentrations of OPG, total RANKL, and biochemical markers of bone turnover in untreated women with postmenopausal osteoporosis and to determine the correlation between changes in bone mineral density and changes in serum OPG, total RANKL, and bone turnover markers.
TNFRSF11B	24886734	RESULTS: OPG (per kilogram fat mass) was increased in women with osteoporosis (p<0.001) compared to groups classified with normal BMD and osteopenia.
TNFRSF11B	10952716	Osteoprotegerin reverses osteoporosis by inhibiting endosteal osteoclasts and prevents vascular calcification by blocking a process resembling osteoclastogenesis.
TNFRSF11B	11237676	Adenoviral delivery of osteoprotegerin ameliorates bone resorption in a mouse ovariectomy model of osteoporosis.
TNFRSF11B	11358418	In animal models, osteoprotegerin-a decoy receptor of osteoprotegerin ligand-blocks osteoporosis and erosions without affecting inflammation.
TNFRSF11B	19158438	We conducted a cross-sectional study of the role of sRANKL and OPG levels as they relate to bone metabolism in elderly postmenopausal women with and without osteoporosis.
TNFRSF11B	26426211	OBJECTIVE: The aim of the study was to explore the association between OPG, RANKL, and RANK gene variations and the bone mineral density (BMD) response to alendronate therapy in postmenopausal Chinese women with osteoporosis or osteopenia.
TNFRSF11B	15803021	BACKGROUND: There is a potential interface between osteoporosis and the chronic inflammation of inflammatory bowel disease (IBD), and the osteoprotegerin (OPG)/receptor for activated nuclear factor-kappaB (RANK)/RANK ligand (RANKL) signaling pathway may be an important mediator, although data are limited.
TNFRSF11B	11239019	Glucocorticoid decreases circulating osteoprotegerin (OPG): possible mechanism for glucocorticoid induced osteoporosis.
TNFRSF11B	22957004	OPG may be a predictor of BMD and an alternative to DEXA for identifying at risk HF patients for osteoporosis.
TNFRSF11B	22377704	The objective of the present study was to investigate the association(s) among MTHFR C677T, MTHFR A1298C, and OPG A163G polymorphisms in Mexican patients with rheumatoid arthritis and osteoporosis.
TNFRSF11B	19346738	The high OPG levels may reflect a preventive mechanism against bone loss; namely, OPG might protect the FMF patients from excessive osteoporosis.
TNFRSF11B	15180028	Osteoprotegerin-receptor activator of nuclear factor-kappaB ligand ratio: a new approach to osteoporosis treatment?
TNFRSF11B	19812402	Autoantibodies against osteoprotegerin, which block the inhibitory effect of osteoprotegerin on signaling by the receptor activator of nuclear factor (NF)-kappaB (RANK), were identified in a man with celiac disease who presented with severe osteoporosis and high bone turnover.
TNFRSF11B	12584041	We hypothesize that OPG plays a major role in the development of transplantation osteoporosis.
TNFRSF11B	16512834	OPG levels probably do not predict BMD in Gaucher disease and hence are not indicative of osteoporosis in Gaucher disease.
TNFRSF11B	21627558	CONCLUSION: The present study showed that using risedronate in treatment of postmenopausal osteoporosis causes no specific changes in OPG levels; therefore, in contrast to some of the studies in the literature OPG may not be useful marker in monitoring of bisphosphonate.
TNFRSF11B	18455228	Three SNPs near the TNFRSF11B gene were associated with decreased bone mineral density (top SNP, rs4355801: p=7.6x10(-10) for lumbar spine and p=3.3x10(-8) for femoral neck) and increased risk of osteoporosis (OR 1.2, 95% CI 1.01-1.42, p=0.038).
TNFRSF11B	12629078	The present study demonstrates age-related changes in cortical bone contents of IGFBPs, calcium, and OPG, possibly related to the pathophysiology of postmenopausal osteoporosis.
TNFRSF11B	20718662	Furthermore, OPG may become a therapeutic option in treatment of osteoporosis of various etiologies including thalassemia.
TNFRSF11B	24867796	The relationship between the g.27450A>T genetic variant of OPG gene and osteoporosis in Chinese postmenopausal women.
TNFRSF11B	12096838	We examined the promoter and the five exons with surrounding intron sequences of the OPG gene for polymorphisms in 50 normal patients and 50 patients with osteoporosis.
TNFRSF11B	21659972	CONCLUSION: Our results showed that using risedronate to treat postmenopausal osteoporosis causes no specific changes in OPG levels; thus, measurement of OPG levels as a marker may not be useful in the monitoring of bisphosphonate treatment.
TNFRSF11B	15240611	Changes in serum receptor activator of nuclear factor-kappaB ligand, osteoprotegerin, and interleukin-6 levels in patients with glucocorticoid-induced osteoporosis treated with human parathyroid hormone (1-34).
TNFRSF11B	24867796	Results from this study support that the g.27450A>T genetic variant of OPG gene has potential relationship with BMD and osteoporosis in Chinese postmenopausal women.
TNFRSF11B	19062016	Osteoprotegerin (OPG) appears to represent the molecular link between bone resorption and vascular calcification, and may help to explain the high prevalence of atherosclerosis and osteoporosis in postmenopausal women.
TNFRSF11B	22057136	Osteoprotegerin (OPG) and receptor activator of nuclear factor-kappa B ligand (RANKL) have been revealed in the pathogenesis of primary osteoporosis and other metabolic bone diseases.
TNFRSF11B	15292302	Recently, OPG gene polymorphisms have been associated with osteoporosis and early predictors of cardiovascular disease.
TNFRSF11B	21376149	Relationship between osteoporosis and adipose tissue leptin and osteoprotegerin in patients with chronic obstructive pulmonary disease.
TNFRSF11B	24424018	CONCLUSIONS: Present results suggest that osteoporosis of the hip is associated with increased circulatory levels of OPG in patients with COPD.
TNFRSF11B	20101412	A comprehensive review of these developments revealed that, to date, at least 15 genes (VDR, ESR1, ESR2, LRP5, LRP4, SOST, GRP177, OPG, RANK, RANKL, COLIA1, SPP1, ITGA1, SP7, and SOX6) can be reasonably assigned as confirmed osteoporosis susceptibility genes, whereas, another >30 genes are promising candidate genes.
TNFRSF11B	11498208	Osteoprotegerin: a link between osteoporosis and arterial calcification?
TNFRSF11B	23391500	Multiparameter analysis of serum levels of C-telopeptide crosslaps, bone-specific alkaline phosphatase, cathepsin K, osteoprotegerin and receptor activator of nuclear factor κB ligand in the diagnosis of osteoporosis.
TNFRSF11B	24283361	In summary, this meta-analysis indicated that the G allele of the OPG A163G polymorphism might increase osteoporosis risk in Caucasians, whereas individuals with the C allele of the G1181C polymorphism had a decreased risk of osteoporosis, especially in Asians.
TNFRSF11B	11204435	This study, for the first time, indicates that a single s.c. injection of OPG is effective in rapidly and profoundly reducing bone turnover for a sustained period and that OPG therefore may be effective in treatment of bone diseases characterized by increased bone resorption such as osteoporosis.
TNFRSF11B	19653807	Since the content of cytokines such as adiponectin, leptin, osteoprogeterin (OPG), soluble receptor activator of nuclear factor kappaB ligand (s-RANKL), tumor necrosis factor alpha, and interleukin 6 (IL-6) may elicit conditions promoting or sustaining osteoporosis, in this work we compared the concentrations of the above-mentioned cytokines and also the level of the soluble receptors for both IL…
TNFRSF11B	17215793	Parameters namely RANKL e OPG may become an important index for the evaluation of the activity of drugs against osteoporosis, old and new like AMG 162 (anti-RANKL action).
TNFRSF11B	16712673	OPG has been proposed as a link molecule between osteoporosis and arterial calcification, but the relationship between the OPG gene and the cardiovascular system in human populations is unclear.
TNFRSF11B	19301089	In conclusion risedronate could improve osteoporosis by increasing osteoprotegerin and reducing RANKL and IL-1beta.
TNFRSF11B	16627581	Deficiency of osteoprotegerin (OPG), a soluble decoy receptor for receptor activator of nuclear factor-kappaB ligand (RANKL), in mice induces osteoporosis caused by enhanced bone resorption.
TNFRSF11B	15068494	Osteoprotegerin and RANKL in the pathogenesis of thalassemia-induced osteoporosis: new pieces of the puzzle.
TNFRSF11B	16464170	OPG is a potent inhibitor of osteoclastic bone resorption and has been investigated as a potential therapeutic for the treatment of both osteoporosis and tumour-induced bone disease.
TNFRSF11B	24683212	OBJECTIVE: The aim of this study was to investigate the relationship between SR treatment and serum osteoprotegerin concentration in women with post-menopausal osteoporosis (PMO).
TNFRSF11B	21711256	RESULTS: MS and osteoporosis share aetiological risk factors such as smoking and hypovitaminosis D, as well as pathogenetic players such as osteopontin and osteoprotegerin.
TNFRSF11B	23619553	These findings will be useful to analyze the role of OPG gene in osteoporosis in the further studies.
TNFRSF11B	12181640	Here, we analyzed whether OPG is involved in the etiology of osteoporosis using both linkage and association analyses.
TNFRSF11B	10499489	Stimulation of osteoprotegerin ligand and inhibition of osteoprotegerin production by glucocorticoids in human osteoblastic lineage cells: potential paracrine mechanisms of glucocorticoid-induced osteoporosis.
TNFRSF11B	20727694	The aim of this study was to investigate the association of OPG with bone mineral density (BMD) and vascular plaques, in order to contribute to a better understanding of the link between atherosclerosis and osteoporosis.
TNFRSF11B	19812402	Such autoantibodies may be associated with the development of high-turnover osteoporosis, but whether autoantibodies against osteoprotegerin commonly contribute to the pathogenesis of osteoporosis in patients with celiac disease remains to be determined.
TNFRSF11B	15562379	Recently, OPG has been proposed as a link molecule between osteoporosis and arterial calcification, but the relationship between circulating OPG levels and cardiovascular disease in human populations is unclear.
TNFRSF11B	26426211	No evidence of an association between any SNP or haplotype of the OPG, RANKL, and RANK genes and the response of BMD to alendronate therapy was found in postmenopausal Chinese women with osteoporosis or osteopenia.
TNFRSF11B	19083628	In the pathogenesis of Charcot neuroarthropathy, recent advances in our understanding of the mechanisms underlying the development of osteopenia and osteoporosis include the central role of the RANK-L OPG signalling system.
TNFRSF11B	12663228	Since osteoporosis is common in primary biliary cirrhosis (PBC), we investigated osteoprotegerin, RANKL and markers of bone turnover in PBC.
TNFRSF11B	24065669	The osteoprotegerin (OPG) gene is considered to play an important role in the pathogenesis of osteoporosis.
TNFRSF11B	17103447	Bone and cartilage and their disorders are addressed under the following headings: functions of bone; normal and abnormal bone remodeling; osteopetrosis and osteoporosis; epithelial-mesenchymal interaction, condensation and differentiation; osteoblasts, markers of bone formation, osteoclasts, components of bone, and pathology of bone; chondroblasts, markers of cartilage formation, secondary carti…
TNFRSF11B	14523602	Modulation of the RANKL/RANK/OPG system in animals results in a skeletal and vascular phenotype, and administration of OPG may prevent osteoporosis and vascular calcification.
TNFRSF11B	21678294	The AC carriers had osteoporosis more frequently (57%) than AA carriers (12%) of the OPG gene (p = 0.0382).
TNFRSF11B	23041523	PM crude extract (PME) significantly down-regulated the expression of RANKL mRNA with no change in the OPG level whereas MR elevated the expression of OPG mRNA with lowering level of RANKL mRNA, resulting in the increased OPG/RANKL ratio, and consequently lead to lowering progression of osteoporosis at molecular level.
TNFRSF11B	15240611	In this experiment, we investigated the changes in serum levels of soluble RANKL (sRANKL), OPG, IL-6, and IL-6sR in patients with glucocorticoid-induced osteoporosis treated with hPTH (1-34).
TNFRSF11B	15812577	In parallel, the possible role of the osteoprotegerin (OPG)/RANKL system in disuse osteoporosis was investigated.
TNFRSF11B	23542786	Pharmacological activation of PPARβ/δ in a mouse model of postmenopausal osteoporosis led to normalization of the altered ratio of tumor necrosis factor superfamily, member 11 (RANKL, also called TNFSF11) to OPG, a rebalancing of bone turnover and the restoration of normal bone density.
TNFRSF11B	23643930	However, the relationships between TGF-β1, OPG and risk of osteoporosis in native Chinese women are unknown.
TNFRSF11B	21050847	Osteoprotegerin protein secretion in hOB cultures was higher in patients with osteoporosis than osteoarthritis.
TNFRSF11B	25694761	After informed consent, all subjects underwent dual energy X-ray absorptiometry (DXA) of the hip and the lumbar spine (L1 to L4) in order to establish a gold standard diagnosis of osteoporosis and an orthopantomogram (OPG).
TNFRSF11B	24283361	Association between seven common OPG genetic polymorphisms and osteoporosis risk: a meta-analysis.
TNFRSF11B	21994215	Polymorphisms within the TNFRSF11B gene have been studied and associated with osteoporosis and fracture risk.
TNFRSF11B	23271131	We tested the effects of polymorphisms in the vitamin D receptor gene (VDR), and OPG gene in rheumatoid arthritis (RA) patients and healthy controls and their relationship to bone mineral density (BMD) and development of osteoporosis.
TNFRSF11B	26635910	In the attempt to address this issue, we sought to determine if OxS, as assessed by 8-hydroxy-2-deoxyguanosine (8-OHdG), may influence the level of receptor activator of nuclear factor-κb ligand (RANKL)/osteoprotegerin (OPG) ratio (a central regulator of bone metabolism) in a sample (n = 124), including postmenopausal women with osteoporosis, osteopenia and normal bone mass density (BMD).
TNFRSF11B	16277162	Recently, two new cytokines, osteoprotegerin (OPG) and the receptor activator of nuclear factor-kB ligand (RANKL), have been implicated in the pathogenesis of postmenopausal osteoporosis and other metabolic bone diseases.
TNFRSF11B	22698865	Several protein factors, such as receptor activator of nuclear factor kappa-B (RANK), receptor activator of nuclear factor kappa-B ligand (RANKL), osteoprotegerin (OPG), have been identified that are important in the pathogenesis of osteoporosis.
TNFRSF11B	12602117	The aim of this cross sectional study was to evaluate the prevalence of osteoporosis, vertebral fracture status and possible risk factors of bone loss including serum osteoprotegerin, a novel key regulator of osteoclast proliferation and activity in the posttransplantation period.
TNFRSF11B	10965921	We previously reported that OPG-deficient mice exhibited severe osteoporosis caused by enhanced osteoclastic bone resorption.
TNFRSF11B	12629078	Age-related changes in cortical bone content of insulin-like growth factor binding protein (IGFBP)-3, IGFBP-5, osteoprotegerin, and calcium in postmenopausal osteoporosis: a cross-sectional study.
TNFRSF11B	23391500	MAIN OUTCOME MEASURES: Based on WHO criteria, women were stratified in four groups (premenopausal: healthy; postmenopausal: healthy, osteopenia, osteoporosis), and their levels of CatK, OPG, RANKL, CTX and BAP were analyzed.
TNFRSF11B	14756238	Previous studies have reported enhanced osteoclastogenesis, increased bone resorption and osteoporosis in osteoprotegerin (OPG)-deficient mice.
TNFRSF11B	12213850	OPG knockout mice develop severe osteoporosis, whereas administration of OPG can prevent ovariectomy-induced bone loss.
TNFRSF11B	15711777	OPG was found to be independently associated with osteoporosis (OR: 2.9, 1.4-5.9) and prevalent vertebral fractures (OR: 2.5, 1.2-5.4).
TNFRSF11B	19812402	Osteoporosis associated with neutralizing autoantibodies against osteoprotegerin.
TNFRSF11B	25877354	A total of 350 patients with postmenopausal osteoporosis and 150 age-matched healthy controls were enrolled, and the serum levels of Dkk-1, β-catenin, sclerostin, OPG, and RANKL were detected by ELISA, and bone turnover markers [CTX, PINP, N-MID-OT and 25(OH)D] were measured by Roche electrochemiluminescence system in two groups.
TNFRSF11B	11561176	Some of these, including oxidized lipids, osteoprotegerin, and bisphosphonates, appear to regulate mineralization in both bone and vasculature and may account for the co-existence of osteoporosis and atherosclerotic calcification that is independent of age.
TNFRSF11B	18299476	The aim of this prospective study was to evaluate the acute effect (up to 1 month) of teriparatide (TPTD; human recombinant PTH 1-34) on serum levels of osteoprotegerin (OPG) and receptor activator for nuclear factor-kappaB ligand (RANKL) in women with established osteoporosis.
TNFRSF11B	26202809	CONCLUSIONS: Evaluation of the polymorphism -950T/C of the OPG gene showed that the CC genotype may appear as an increased risk factor for the faster loss of bone mass and the onset of osteoporosis in Polish postmenopausal women.
TNFRSF11B	18297084	In contrast, loss of all Notch signaling in osteoblasts, generated by deletion of the genes encoding presenilin-1 and presenilin-2 in bone, is associated with late-onset, age-related osteoporosis, which in turn results from increased osteoblast-dependent osteoclastic activity due to decreased osteoprotegerin mRNA expression in these cells.
TNFRSF11B	16567356	These results suggest that the imbalance between RANKL and OPG might be involved in the pathogenesis and clinical courses of osteoporosis in AS.
TNFRSF11B	24410296	For the OPG A163G polymorphism, the combined results showed that the G allele of the A163G polymorphism may be associated with an increased risk of osteoporosis.
TNFRSF11B	23731710	Screening of osteoprotegerin-related feature genes in osteoporosis and functional analysis with DNA microarray.
TNFRSF11B	23643930	CONCLUSIONS: The risk of osteoporosis in native Chinese women increased as circulating TGF-β1 was reduced and OPG was raised.
TNFRSF11B	11578019	The most significant elevations of OPG and HGF were found in patients with RA, the rheumatic disease most frequently associated with the development of secondary osteoporosis.
TNFRSF11B	15526523	There was a significant positive association between serum OPG levels and age (r=0.27; p<0.001), both in the postmenopausal women as a whole and in the cohort with osteoporosis.
TNFRSF11B	17676381	We investigated whether augmentation index (AIx), a measure of pulse wave reflections and arterial stiffness, is increased and related to the osteoprotegerin (OPG)/receptor activator of nuclear factor-kappa B ligand (RANKL) system in postmenopausal osteoporosis.
TNFRSF11B	21411255	OBJECTIVES: Osteoprotegerin (OPG) inhibits osteoclast function by acting as a decoy receptor for receptor activator of nuclear factor-κB ligand (RANKL), thus being an important candidate gene for osteoporosis.
TNFRSF11B	19590040	Unopposed RANKL activity in osteoprotegerin-deficient mice resulted in osteoporosis and vascular calcification.
TNFRSF11B	21627558	The effect of risedronate treatment on serum osteoprotegerin and bone marker levels in postmenopausal women with osteoporosis.
TNFRSF11B	15542046	RANK-L promotes focal and systemic osteoporosis, whereas osteoprotegerin (OPG) inhibits bone resorption.
TNFRSF11B	17403189	No differences were found in OPG levels between patients with and without osteoporosis by densitometric criteria or fractures.
TNFRSF11B	23643930	We investigated correlations of BMD T-scores with circulating TGF-β1 and BMD T-scores with circulating OPG in healthy native Chinese women, and to study the effects of changes in TGF-β1 and OPG on osteoporosis.
TNFRSF11B	24975835	Previous studies suggest that the osteoprotegerin gene (OPG) plays an important role in the development of osteoporosis.
TNFRSF11B	16343827	OBJECTIVE: In this study, three single nucleotide polymorphisms (SNPs) within the TNFRSF11B gene were studied for association with an increased risk of osteoporosis in postmenopausal Maltese women (n=126).
TNFRSF11B	19653867	Recombinant Fc-OPG was evaluated in women with osteoporosis and malignant bone disease.
TNFRSF11B	19062016	We investigated a possible association between serum OPG levels and arterial stiffness in postmenopausal women with osteoporosis.
TNFRSF11B	23607938	Mutations and variations in the OPG gene cause many human diseases that are characterized by not only skeletal abnormalities but also poorly understood hearing loss: Paget's disease, osteoporosis, and celiac disease.
TNFRSF11B	15781001	OPG knock-out animals develop severe osteoporosis.
TNFRSF11B	23271131	We found a significant association between lower hip (BMD-h) and genotype variants of VDR (BsmI) and OPG A163G in RA patients with osteoporosis.
TNFRSF11B	11485016	Abnormalities of the RANKL/OPG system have been implicated in the pathogenesis of postmenopausal osteoporosis, rheumatoid arthritis, Paget's disease, periodontal disease, benign and malignant bone tumors, bone metastases, and hypercalcemia of malignancy, while administration of OPG has been demonstrated to prevent or mitigate these disorders in animal models.
TNFRSF11B	23837846	OBJECTIVE: The aim of this study was to detect the influence of g.19124G>A genetic polymorphism in the osteoprotegerin (OPG) gene on bone mineral density (BMD) and osteoporosis in Chinese postmenopausal women.
TNFRSF11B	22162676	Several cytokines such as IL-1, IL-6, RANKL, OPG, and M-CSF were implicated in the pathogenesis of osteoporosis.
TNFRSF11B	24424018	RESULTS: From patients with normal hip BMD (n = 32, T-score 0.1 ± 0.8) to those with osteopenia (n = 14, T-score -1.6 ± 0.4) and osteoporosis (n = 10, T-score -3.4 ± 0.7) serum OPG levels significantly increased (6.6 ± 1.8 versus 7.2 ± 2.9 and versus 8.6 ± 1.5 pmol/l, p = 0.036).
TNFRSF11B	24737508	Results from this study suggest that the g.27667T>A genetic variant in the OPG gene is potentially related to BMD and osteoporosis in Chinese postmenopausal women.
TNFRSF11B	15517638	Osteoporosis occurs frequently in patients with AS and OPG represents a soluble decoy receptor that neutralizes receptor activator of nuclear factor-kB ligand (RANKL), an essential cytokine for osteoclast function.
TNFRSF11B	21376149	Our aim was to investigate expressions of leptin and osteoprotegerin (OPG) in the adipose tissue, and their relationships to osteoporosis in patients with COPD.
TNFRSF11B	15777350	Osteoprotegerin to soluble receptor activator of nuclear factor kappa-B ligand ratio is reduced in patients with thalassaemia-related osteoporosis who receive vitamin D3.
TNFRSF11B	16787719	CONCLUSIONS: These in vivo data demonstrate that RAL could improve osteoporosis, also through an increase of OPG production by osteoblasts.
TNFRSF11B	10465311	OPG prevents bone loss when administered to ovariectomized rats, induces osteoporosis when ablated in knock-out mice, and induces osteopetrosis when overexpressed in transgenic mice.
TNFRSF11B	20678025	AREAS COVERED IN THIS REVIEW: The discovery of the receptor activator of NF-kappaB ligand (RANKL) and its two receptors, RANK and osteoprotegerin (OPG), has not only established a crucial role for the RANKL/RANK/OPG axis in osteoclast biology but also created a great opportunity to develop new drugs targeting this system for osteoporosis therapy.
TNFRSF11B	12629078	To evaluate whether changes in these proteins may to some extent explain the decrease in bone mass in postmenopausal or senile osteoporosis, we measured bone contents of IGF-I, IGF-II, IGF binding protein (IGFBP)-3, IGFBP-5, and OPG in combined extracts obtained after EDTA and guanidine hydrochloride extraction in 60 postmenopausal women aged 47-74 (mean, 63) yr with a previous distal forearm fra…
TNFRSF11B	24457406	The osteoprotegerin gene (OPG) is considered to play an important role in the pathogenesis of osteoporosis.
TNFRSF11B	17202317	Consequently, T-cell-deficient nude mice, CD40 KO mice, and CD40L KO mice display osteoporosis and diminished BM OPG production.
TNFRSF11B	19724159	The osteoprotegerin (OPG)/receptor activator of nuclear factor-kB (RANK)/RANK ligand (RANKL) system has been identified as a possible mediator of arterial calcification suggesting common links between osteoporosis and vascular diseases.
TNFRSF11B	12793029	We hypothesise that low OPG levels in preset conditions of bone turnover may indicate a higher risk of fracture in patients with osteoporosis.
TNFRSF11B	25177945	Our results indicated that the A allele was an increased risk factor for primary osteoporosis and the g.19074G>A genetic variant of the OPG gene was associated with BMD and primary osteoporosis in Chinese postmenopausal women.
TNFRSF11B	16424941	Using osteoprotegerin-deficient mice, which exhibit severe osteoporosis due to excessive receptor activator of NF-kappaB ligand/receptor activator of NF-kappaB (RANKL/RANK) stimulation, we show herein that oral treatment of these mice with 1alpha,25-dihydroxyvitamin D3 [1alpha,25(OH)2D3] inhibited bone resorption and prevented bone loss, suggesting that VDR counters RANKL/RANK signaling.
TNFRSF11B	21182499	METHODS: We evaluated 50 patients with psoriasis, with or without psoriatic arthritis (PsA), for the presence and degree of osteoporosis by performing dual energy x-ray absorptiometry (DEXA) and obtaining serum osteoprotegrin (OPG) levels.
TNFRSF11B	24067544	The objective of this study was to evaluate the association of single nucleotide polymorphisms (SNPs) of osteoprotegerin gene (OPG) with bone mineral density (BMD) and osteoporosis.
TNFRSF11B	12181640	Accordingly, OPG could be a strong candidate gene for susceptibility to human osteoporosis.
TNFRSF11B	26092508	Raised titres of antibodies to OPG were found in 7/71 (9.8 %) patients with coeliac disease, compared with 1/72 (1.4 %) non-coeliac osteoporosis clinic control patients (p < 0.05).
TNFRSF11B	26426211	OPG, RANKL, and RANK gene polymorphisms and the bone mineral density response to alendronate therapy in postmenopausal Chinese women with osteoporosis or osteopenia.
TNFRSF11B	15068494	These data are extremely important for the possible therapeutic use of RANKL antagonists such as OPG in thalassemia-induced osteoporosis.
TNFRSF11B	24410296	OBJECTIVE: Whereas some studies have reported that the osteoprotegerin (OPG) gene is associated with osteoporosis risk in some studies, their results have proved inconclusive.
TNFRSF11B	26426211	MATERIALS AND METHODS: In the present study, 40 single-nucleotide polymorphisms (SNPs) in the OPG, RANKL, and RANK genes were genotyped in 501 postmenopausal Chinese women with osteoporosis or osteopenia who were given alendronate (70 mg weekly) orally for 1 year.
TNFRSF11B	9573043	osteoprotegerin-deficient mice develop early onset osteoporosis and arterial calcification.
TNFRSF11B	21307155	CONCLUSIONS: This study indicates that the circulating levels of OPG and RANKL are inversely related to BMD and contribute to the development of osteoporosis in postmenopausal women.
TNFRSF11B	26094891	Thus, osteoprotegerin and Denosumab prevent RANKL/RANK interaction to stimulate β-cell replication, highlighting the potential for repurposing an osteoporosis drug to treat diabetes.
TNFRSF11B	22377704	MTHFR C677T, MTHFR A1298C, and OPG A163G polymorphisms in Mexican patients with rheumatoid arthritis and osteoporosis.
TNFRSF11B	19301089	The objective of this study was to determine the effects of risedronate treatment on the level of serum cytokines including receptor activator of nuclear factor-kappaB ligand (RANKL) and osteoprotegerin among postmenopausal women with osteoporosis.
TNFRSF11B	23856613	Previous evidence supports that the osteoprotegerin (OPG) gene is one of the most important candidate genes for influencing the pathogenesis of osteoporosis.
TNFRSF11B	22057136	These data suggest that, in Chinese RA patients, an altered modulation of the OPG/RANKL system resulting in increased RANKL and decreased OPG in peripheral blood, could contribute to the bone loss characteristic and the generation of osteoporosis in these patients.
TNFRSF11B	21307155	BACKGROUND: Osteoprotegerin (OPG) and receptor activator of nuclear factor κ B ligand (RANKL) play a critical role in the regulation of bone turnover, but the relative importance of these two cytokines in the pathogenesis of postmenopausal osteoporosis is controversial.
TNFRSF11B	20554715	BACKGROUND: In Europeans and populations of European origin, several osteoporosis susceptibility genes, including ZBTB40, RANK, RANKL, OPG, MHC, and ESR1, were recently identified.
TNFRSF11B	9108485	These data show that OPG can act as a soluble factor in the regulation of bone mass and imply a utility for OPG in the treatment of osteoporosis associated with increased osteoclast activity.
TNFRSF11B	18612580	Relationship of calcification of atherosclerotic plaque and arterial stiffness to bone mineral density and osteoprotegerin in postmenopausal women referred for osteoporosis screening.
TNFRSF11B	16949901	No associations between OPG gene polymorphisms or serum levels and measures of osteoporosis in elderly Australian women.
TNFRSF11B	25708645	Our data identify osteoprotegerin as a novel protector of muscle integrity, and it potentially represents a new therapeutic avenue for both muscular diseases and osteoporosis.
TNFRSF11B	16999948	RESULTS: The use of the genotyping in single tube through allele-specific PCR and melting curves has led us to the accurate genotype of three polymorphisms of vdr (cdx-2), osteoprotegerin (A-163G) and ppar-gamma (C-681G) genes in 225 postmenopausal women to be associated to osteoporosis.
TNFRSF11B	24410296	Significant associations between the A163G and G1181C polymorphisms of the osteoprotegerin gene and risk of osteoporosis, especially in postmenopausal women: a meta-analysis.
TNFRSF11B	17911175	EVIDENCE ACQUISITION: A literature search of the MEDLINE database was performed to find articles in English using the search terms "allogeneic stem cell transplant" or "bone marrow transplant," in combination with "bone loss," "osteoporosis treatment," "osteoblast," "cytokines," or "osteoprotegerin.""
TNFRSF11B	18560259	The aim of this study was to determine the effects of raloxifene treatment on serum concentrations of OPG, receptor RANKL and its relationship with biochemical markers of bone turnover and bone mineral density (BMD) in previously untreated women with post-menopausal osteoporosis.
TNFRSF11B	21678294	Experimental studies have shown that osteoprotegerin (OPG) gene knockout mice have aortic calcification and osteoporosis at the same time.
TNFRSF11B	26131575	The effect of A163G polymorphism in the osteoprotegerin gene on osteoporosis related traits in Slovak postmenopausal women.
TNFRSF11B	16823725	Osteoprotegerin (OPG), a member of the tumor necrosis factor receptor family, and ligand of receptor activator of NFkB (RANKL) are involved in the process of bone turnover and have been implicated in the pathogenesis of osteoporosis and other metabolic bone diseases.
TNFRSF11B	17895323	Subsequently, the further understanding of this pathway led to the development of new therapeutic modalities including the human monoclonal antibody to RANKL and recombinant OPG as a target for treatment of postmenopausal osteoporosis and multiple myeloma.
TNFRSF11B	11121682	Moreover, OPG expression is induced by estrogen which provides a molecular explanation of postmenopausal osteoporosis in women.
TNFRSF11B	26202809	OPG 1181G/C and OPG -163A/G polymorphisms have been associated not only with body weight and birth weight, but also with reduced bone density and an increased risk of postmenopausal osteoporosis.
TNFRSF11B	12879416	OPG deficiency causes severe osteoporosis.
TNFRSF11B	26065000	We aim to evaluate the association between SNPs C950T (rs2073617), C209T (rs3134069), T245G (rs3134070) in the TNFRSF11B (OPG) gene, and osteoporosis in RA.
TNFRSF11B	23643930	When TGF-β1 and OPG concentrations were grouped according to quartile intervals, T-score and the prevalence and risk of osteoporosis varied with changes in the cytokines.
TNFRSF11B	15978970	The aim of our work was to find polymorphisms in the OPG gene and to investigate their possible contribution to the genetic susceptibility to osteoporosis by testing for their association with bone mineral density (BMD).
TNFRSF11B	14500574	Deficiency of osteoprotegerin (OPG), a soluble decoy receptor for receptor activator of nuclear factor-kappaB ligand (RANKL), in mice induces osteoporosis caused by enhanced bone resorption, but also accelerates bone formation.
TNFRSF11B	15526523	The relationship between circulating OPG levels and osteoporosis in postmenopausal women is controversial.
TNFRSF11B	14697750	The aim of this study was to determine if osteoprotegerin (OPG), an inhibitor of the RANKL-RANK interaction and possibly a new drug against osteoporosis, would adversely affect immunity.
TNFRSF11B	18067789	The concentrations of serum OPG and MMP-2 increase possibly as a concomitant event in the high bone turnover state, such as postmenopausal osteoporosis.
TNFRSF11B	19747396	This review provides an overview of the potential innovative therapeutic strategies of OPG in metastatic breast and prostate carcinoma, multiple myeloma, postmenopausal osteoporosis, glucocorticoid-induced osteoporosis and rheumatoid arthritis.
TNFRSF11B	12793029	Serum OPG levels were measured in 177 healthy women (aged 17-85 years) and in 48 untreated patients (mean age 71 +/- 5) with established osteoporosis, and related to age, bone mass, markers of bone turnover and, in the case of patients with osteoporosis, to pre-existing vertebral fractures.
TNFRSF11B	11485016	Transgenic and knock-out mice with excessive or defective production of RANKL, RANK, and OPG display the extremes of skeletal phenotypes, osteoporosis and osteopetrosis.
TNFRSF11B	11237676	This study demonstrates that a single adenoviral gene transfer can produce persistent high-level OPG expression and shows that gene therapy to provide sustained delivery of OPG may prove useful in treating osteoporosis.
TNFRSF11B	16115489	OBJECTIVE: Osteoprotegerin (OPG), a member of the tumor necrosis factor receptor family, is involved in the process of bone turnover and also in the pathogenesis of osteoporosis and premature calcification of the vascular system.
TNFRSF11B	12568404	Expression of RANKL and OPG correlates with age-related bone loss in male C57BL/6 mice.
TNFRSF11B	16704959	Osteoporosis patients had mild renal impairment and their BMD correlated with osteoprotegerin, and bone resorption markers.
TNFRSF11B	20731767	Plasma 25OHD was significantly lower (p < 0.001) and RANKL and OPG significantly higher in the women with osteoporosis than in control subjects (p < 0.0001).
TNFRSF11B	24424018	Circulatory osteoprotegerin is related to osteoporosis of the hip in patients with COPD.
TNFRSF11B	18228207	Mice lacking OPG gene present osteoporosis and arterial calcification, while overexpression of OPG gene leads to osteopetrosis.
TNFRSF11B	23271131	Our results suggested that OPG A163G polymorphism was associated with RA susceptibility and with the development of osteoporosis in these patients.
TNFRSF11B	14680982	Given that osteoprotegerin plays an important role in bone remodeling, the osteoprotegerin gene may be a candidate locus for susceptibility to osteoporosis.
TNFRSF11B	24067544	Association between osteoprotegerin genetic variants and osteoporosis in Chinese postmenopausal women.
TNFRSF11B	20210559	Relatively high serum levels of OPG have been observed in postmenopausal women with osteoporosis compared with age-matched controls.
TNFRSF11B	24457406	DISCUSSION: These findings indicate that the OPG gene is related to BMD and osteoporosis in Chinese postmenopausal women.
TNFRSF11B	20731767	CONCLUSION: Periodontal disease is more common in women with osteoporosis and is associated with lower vitamin D and higher concentrations of RANKL and OPG.
TNFRSF11B	22967165	Eurycoma longifolia upregulates osteoprotegerin gene expression in androgen- deficient osteoporosis rat model.
TNFRSF11B	16105967	Search terms osteoprotegerin, OPG, RANK, RANKL, and RANK ligand were used alone and in combination with bone, osteoporosis, and disease.
TNFRSF11B	12181640	Linkage and association analyses of the osteoprotegerin gene locus with human osteoporosis.
TNFRSF11B	22057136	Osteoprotegerin and RANKL in the pathogenesis of rheumatoid arthritis-induced osteoporosis.
TNFRSF11B	12498383	OPG has an important function as a protector of bone, demonstrated by the fact that OPG(-/-) mice have severe osteoporosis.
TNFRSF11B	20718662	Osteoprotegerin (OPG) and receptor activator of NF-kappa-B ligand (RANKL) have been recently implicated in the pathogenesis of various types of osteoporosis.
TNFRSF11B	18299476	CONCLUSIONS: TPTD therapy in women with postmenopausal osteoporosis results in acute increase in serum RANKL levels but does not affect serum OPG.
TNFRSF11B	22391059	Moreover, the relationship between OPG, osteoporosis, and vertebral fractures in T2DM remains to be elucidated.
TNFRSF11B	12793029	In patients with osteoporosis, however, OPG correlated strongly with markers of bone turnover; this may point toward a higher level of RANKL/OPG expression in these patients.
TNFRSF11B	12707582	Inhibition of RANKL function via the natural decoy receptor osteoprotegerin (OPG, TNFRSF11B) prevents bone loss in postmenopausal osteoporosis and cancer metastases.
TNFRSF11B	11121682	Osteoprotegerin ligand (OPGL, TNFS11) and its receptor RANK (TNFRS11A) are essential for the development and activation of osteoclasts and critical regulators of physiological bone remodeling and osteoporosis.
TNFRSF11B	19062016	70 postmenopausal women with osteoporosis and cardiovascular risk factors but without coronary artery disease were evaluated for metabolic, inflammatory parameters and serum OPG levels.
TNFRSF11B	26568375	This analysis revealed evidence of parallel differentiation in genes relevant to appearance and production traits exemplified with the candidate gene OPG, implicated in Osteoporosis, a disorder related to overconsumption of calcium in egg-laying hens.
TNFRSF11B	18301800	Alterations in the RANKL/ OPG ratio are central in the pathogenesis of bone loss, from osteoporosis in all its forms to malignancy-induced bone loss.
TNFRSF11B	18612580	We examined relationships between calcification of subclinical atherosclerotic plaque and arterial stiffness with bone mineral density (BMD) and OPG in a group of 54 postmenopausal women referred for routine osteoporosis screening by dual-energy X-ray absorptiometric scanning of the lumbar spine and hip.
TNFRSF11B	12213849	Osteoprotegerin gene polymorphism and the risk of osteoporosis and vascular disease.
TNFRSF11B	18560259	Effects of raloxifene therapy on circulating osteoprotegerin and RANK ligand levels in post-menopausal osteoporosis.
TNFRSF11B	19352306	Two cytokines, osteoprotegerin (OPG) and receptor activator of nuclear factor kappa B ligand (RANKL), have recently been identified as important mediators in the pathogenesis of osteoporosis.
[truncated: 11,275 more rows]

## Sheet: MicroRNA
MicroRNA	Pubmed ID	Sentence
[truncated: 134 more rows]
